# Supplementary material for: The azidosulfonylation of terminal alkynes leading to β-azidovinyl sulfones
Source: Royal Society of Chemistry journal article supplement (doi:10.1039/d1cc04268h), 2021-01-01
Supplement: d1cc04268h1.pdf [file d1cc04268h1.pdf]

*Supporting Information*

**The Azidosulfonylation of Terminal Alkynes Leading to  $\beta$ -  
azidovinyl Sulfones**

Long Zheng, Zhanjing Wang, Chen Li, Yong Wu\*, Zhaohong Liu\* and Yongquan Ning\*

**Table of Contents**

|                                                                                |     |
|--------------------------------------------------------------------------------|-----|
| <b>I.</b> General information .....                                            | S2  |
| <b>II.</b> General procedures for the preparation of <b>3</b> & <b>4</b> ..... | S2  |
| <b>III.</b> Analytical data for <b>3</b> , <b>4</b> and <b>5</b> .....         | S2  |
| <b>IV.</b> X-ray crystallography of <b>3h</b> .....                            | S12 |
| <b>V.</b> References .....                                                     | S12 |
| <b>VI.</b> NMR spectra for <b>3</b> , <b>4</b> & <b>5</b> .....                | S14 |
| <b>VII.</b> Mechanistic study using DFT computations .....                     | S49 |

## I. General information

All reagents were purchased from commercial sources and used without treatment, unless otherwise indicated. Solvents were purified by standard procedure. Zhdankin reagents were synthesized according to the literature.<sup>[1]</sup> The products were purified by column chromatography over silica gel (300-400 size). NMR spectra were recorded on a Bruker Advance 600 (<sup>1</sup>H: 600 MHz, <sup>13</sup>C: 150 MHz, <sup>19</sup>F: 565 MHz) at ambient temperature. Data were reported as chemical shifts in ppm relative to TMS (0 ppm) for <sup>1</sup>H and CDCl<sub>3</sub> (77.0 ppm) for <sup>13</sup>C. The following abbreviations were used to explain the multiplicities: s = singlet, d = doublet, t = triplet, q = quartet, m = multiplet, br = broad. Mass spectra were recorded on TSQ 8000 Evo by using EI method. Elemental Analysis were recorded on euro Vector EA 3000.

## II. General procedures for the $\beta$ -azidovinyl Sulfones

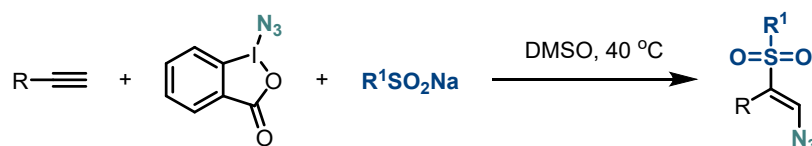

Under nitrogen, to a solution of alkynes (0.3 mmol, 1 equiv) in DMSO (2 ml) was added sodium sulfinate **2** (0.9 mmol, 3 equiv) and the hypervalent iodine reagent **I** (0.9 mmol, 3 equiv) subsequently. The mixture was stirred at 40 °C. After completion indicated by TLC, the resulting mixture was extracted by dichloromethane (3 x 20 mL). The combined organic layer was washed with brine (3 x 10 mL) and dried over MgSO<sub>4</sub>, which is then concentrated under reduced pressure. The residue is purified by column chromatography on silica gel with petroleum ether as eluent to provide **3** & **4**.

**Note:** Product can't be analyzed by HRMS, probably due to the decomposition.

## III. Analytical data for **3** & **4** and **5**.

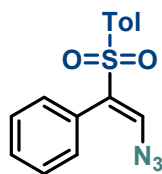

**(3a)**. White solid (85% yield); <sup>1</sup>H NMR (600 MHz, CDCl<sub>3</sub>)  $\delta$  7.80 (s, 1H), 7.48 (d,  $J$  = 8.4 Hz, 2H), 7.35-7.32 (m, 1H), 7.30-7.27 (m, 2H), 7.19 (d,  $J$  = 8.4 Hz, 2H), 7.12 (d,  $J$  = 7.2 Hz, 2H), 2.38 (s, 3H). <sup>13</sup>C NMR (150 MHz, CDCl<sub>3</sub>)  $\delta$  144.3, 137.9, 136.2, 131.5, 130.6, 129.5, 129.4, 128.3, 128.2, 128.1, 21.6. IR (KBr, cm<sup>-1</sup>) 2179 (N<sub>3</sub>).

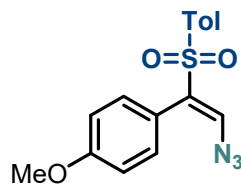

**(3b)**. Colorless oil (78% yield);  $^1\text{H NMR}$  (600 MHz,  $\text{CDCl}_3$ )  $\delta$  7.75 (s, 1H), 7.49 (d,  $J = 8.4$  Hz, 2H), 7.19 (d,  $J = 7.8$  Hz, 2H), 7.06 (d,  $J = 9$  Hz, 2H), 6.81 (d,  $J = 9$  Hz, 2H), 3.79 (s, 3H), 2.38 (s, 3H).  $^{13}\text{C NMR}$  (150 MHz,  $\text{CDCl}_3$ )  $\delta$  160.3, 144.2, 137.6, 136.3, 132.0, 131.3, 129.5, 128.1, 120.2, 113.8, 55.2, 21.6. **IR** (KBr,  $\text{cm}^{-1}$ ) 2140 ( $\text{N}_3$ ).

---

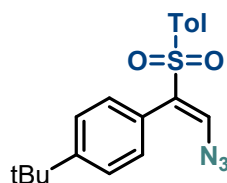

**(3c)**. Colorless oil (82% yield);  $^1\text{H NMR}$  (600 MHz,  $\text{CDCl}_3$ )  $\delta$  7.78 (s, 1H), 7.50 (d,  $J = 7.8$  Hz, 2H), 7.30 (d,  $J = 8.4$  Hz, 2H), 7.19 (d,  $J = 7.8$  Hz, 2H), 7.05 (d,  $J = 8.4$  Hz, 2H), 2.39 (s, 3H), 1.29 (s, 9H).  $^{13}\text{C NMR}$  (150 MHz,  $\text{CDCl}_3$ )  $\delta$  152.5, 144.1, 137.8, 136.4, 131.5, 130.1, 129.5, 128.1, 125.3, 125.2, 34.7, 31.1, 21.6. **IR** (KBr,  $\text{cm}^{-1}$ ) 2138 ( $\text{N}_3$ ).

---

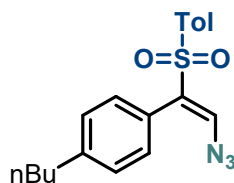

**(3d)**. Colorless oil (75% yield);  $^1\text{H NMR}$  (600 MHz,  $\text{CDCl}_3$ )  $\delta$  7.76 (s, 1H), 7.48 (d,  $J = 7.8$  Hz, 2H), 7.18 (d,  $J = 7.8$  Hz, 2H), 7.10 (d,  $J = 7.8$  Hz, 2H), 7.02 (d,  $J = 7.8$  Hz, 2H), 2.59 (t,  $J = 7.8$  Hz, 2H), 2.38 (s, 3H), 1.59 – 1.54 (m, 2H), 1.35 – 1.29 (m, 2H), 0.91 (t,  $J = 7.2$  Hz, 3H).  $^{13}\text{C NMR}$  (150 MHz,  $\text{CDCl}_3$ )  $\delta$  144.3, 144.1, 137.6, 136.3, 131.5, 130.3, 129.4, 128.3, 128.1, 125.3, 35.4, 33.1, 22.2, 21.5, 13.9. **IR** (KBr,  $\text{cm}^{-1}$ ) 2158 ( $\text{N}_3$ ).

---

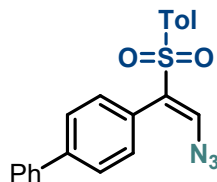

**(3e)**. Colorless oil (80% yield);  $^1\text{H NMR}$  (600 MHz,  $\text{CDCl}_3$ )  $\delta$  7.85 (s, 1H), 7.57 (d,  $J = 6.8$  Hz, 2H), 7.53 (d,  $J = 8.4$  Hz, 4H), 7.43 (t,  $J = 7.8$  Hz, 2H), 7.37 – 7.34 (m, 1H), 7.22 – 7.20 (m, 4H), 2.38 (s, 3H).  $^{13}\text{C NMR}$  (150 MHz,  $\text{CDCl}_3$ )  $\delta$  144.3, 142.0, 140.1, 138.1, 136.3, 131.1, 130.9, 129.6, 128.8, 128.2, 127.7, 127.2, 127.1, 127.0, 21.6. **IR** (KBr,  $\text{cm}^{-1}$ ) 2136 ( $\text{N}_3$ ).

---

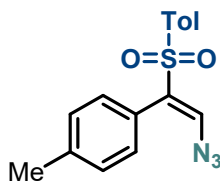

**(3f).** Colorless oil (80% yield);  $^1\text{H NMR}$  (600 MHz,  $\text{CDCl}_3$ )  $\delta$  7.76 (d,  $J = 7.8$  Hz, 1H), 7.49 (d,  $J = 7.8$  Hz, 2H), 7.20 (d,  $J = 7.8$  Hz, 2H), 7.10 (d,  $J = 7.8$  Hz, 2H), 7.00 (d,  $J = 8.4$  Hz, 2H), 2.38 (s, 3H), 2.32 (s, 3H).  $^{13}\text{C NMR}$  (150 MHz,  $\text{CDCl}_3$ )  $\delta$  144.2, 139.5, 137.8, 136.3, 131.6, 130.4, 129.5, 129.1, 128.2, 125.2, 21.6, 21.3. **IR** (KBr,  $\text{cm}^{-1}$ ) 2133 ( $\text{N}_3$ ). **Elemental Analysis:** N(%): 13.281, C(%): 60.895, H(%): 5.240, S(%): 10.532, O(%): 10.052.

---

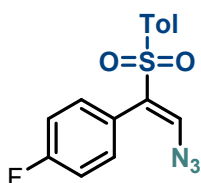

**(3g).** White solid (86% yield);  $^1\text{H NMR}$  (600 MHz,  $\text{CDCl}_3$ )  $\delta$  7.82 (s, 1H), 7.48 (d,  $J = 8.4$  Hz, 2H), 7.20 (d,  $J = 8.4$  Hz, 2H), 7.12 (m, 2H), 6.98 (m, 2H), 2.39 (s, 3H)  $^{13}\text{C NMR}$  (150 MHz,  $\text{CDCl}_3$ )  $\delta$  163.2 (d,  $J_{\text{C-F}} = 250.3$  Hz), 144.4, 138.3, 136.0, 132.5 (d,  $J_{\text{C-F}} = 8.7$  Hz), 130.4, 129.6, 128.1, 124.2 (d,  $J_{\text{C-F}} = 3.7$  Hz), 115.5 (d,  $J_{\text{C-F}} = 22.4$  Hz), 21.6;  $^{19}\text{F NMR}$  (564 MHz,  $\text{CDCl}_3$ ):  $\delta$  -111.8. **IR** (KBr,  $\text{cm}^{-1}$ ) 2129 ( $\text{N}_3$ ).

---

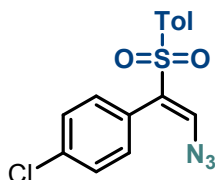

**(3h).** White solid (67% yield);  $^1\text{H NMR}$  (600 MHz,  $\text{CDCl}_3$ )  $\delta$  7.83 (s, 1H), 7.48 (d,  $J = 8.4$  Hz, 2H), 7.27 (d,  $J = 8.4$  Hz, 2H), 7.21 (d,  $J = 8.4$  Hz, 2H), 7.08 (d,  $J = 9$  Hz, 2H), 2.39 (s, 3H)  $^{13}\text{C NMR}$  (150 MHz,  $\text{CDCl}_3$ )  $\delta$  144.5, 138.4, 136.0, 135.6, 131.8, 130.2, 129.6, 128.7, 128.1, 126.8, 21.6 **IR** (KBr,  $\text{cm}^{-1}$ ) 2152 ( $\text{N}_3$ ).

---

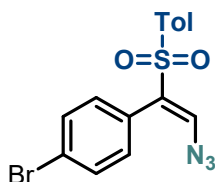

**(3i).** Colorless oil (75% yield);  $^1\text{H NMR}$  (600 MHz,  $\text{CDCl}_3$ )  $\delta$  7.84 (s, 1H), 7.49 (d,  $J = 8.4$  Hz, 2H), 7.43 (d,  $J = 8.4$  Hz, 2H), 7.21 (d,  $J = 8.4$  Hz, 2H), 7.02 (d,  $J = 8.4$  Hz, 2H), 2.39 (s, 3H).  $^{13}\text{C NMR}$

**NMR** (150 MHz, CDCl<sub>3</sub>)  $\delta$  144.5, 138.5, 136.0, 132.1, 131.7, 130.2, 129.7, 128.1, 127.3, 123.9, 21.6. **IR** (KBr, cm<sup>-1</sup>) 2159 (N<sub>3</sub>).

---

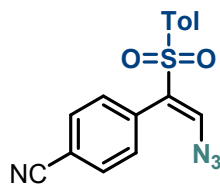

**(3j)**. Colorless oil (70% yield); **<sup>1</sup>H NMR** (600 MHz, CDCl<sub>3</sub>)  $\delta$  7.93 (s, 1H), 7.58 (d, *J* = 8.4 Hz, 2H), 7.48 (d, *J* = 7.8 Hz, 2H), 7.31 (d, *J* = 8.4 Hz, 2H), 7.22 (d, *J* = 8.4 Hz, 2H), 2.39 (s, 3H). **<sup>13</sup>C NMR** (150 MHz, CDCl<sub>3</sub>)  $\delta$  144.8, 139.4, 135.8, 133.4, 132.0, 131.2, 129.8, 129.3, 128.0, 118.2, 113.0, 21.6. **IR** (KBr, cm<sup>-1</sup>) 2161 (N<sub>3</sub>).

---

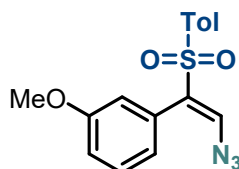

**(3k)**. Colorless oil (73% yield); **<sup>1</sup>H NMR** (600 MHz, CDCl<sub>3</sub>)  $\delta$  7.78 (s, 2H), 7.52 (d, *J* = 7.8 Hz, 2H), 7.21-7.18 (m, 3H), 6.88-6.87 (m, 1H), 6.68-6.66 (m, 2H), 3.73 (s, 3H), 2.39 (s, 3H). **<sup>13</sup>C NMR** (150 MHz, CDCl<sub>3</sub>)  $\delta$  159.3, 138.0, 136.2, 131.3, 129.5, 129.3, 128.3, 122.9, 115.7, 115.4, 55.2, 21.6. **IR** (KBr, cm<sup>-1</sup>) 2134 (N<sub>3</sub>).

---

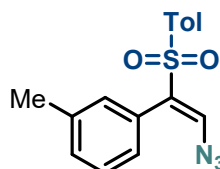

**(3l)**. Colorless oil (yield); **<sup>1</sup>H NMR** (600 MHz, CDCl<sub>3</sub>)  $\delta$  7.77 (s, 1H), 7.49 (d, *J* = 8.4 Hz, 2H), 7.20 (d, *J* = 7.8 Hz, 2H), 7.17-7.13 (m, 2H), 6.96 (s, 1H), 6.82 (d, *J* = 7.2 Hz, 1H), 2.39 (s, 3H), 2.29 (s, 3H). **<sup>13</sup>C NMR** (150 MHz, CDCl<sub>3</sub>)  $\delta$  144.3, 138.1, 137.8, 136.2, 131.7, 131.1, 130.2, 129.5, 128.3, 128.2, 127.6, 21.6, 21.4. **IR** (KBr, cm<sup>-1</sup>) 2132 (N<sub>3</sub>).

---

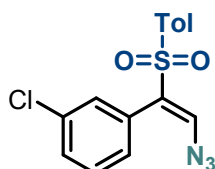

**(3m)**. Colorless oil (76% yield); **<sup>1</sup>H NMR** (600 MHz, CDCl<sub>3</sub>)  $\delta$  7.85 (s, 1H), 7.50 (d, *J* = 8.4 Hz, 2H), 7.32-7.30 (m, 1H), 7.24-7.21 (m, 3H), 7.13 (s, 1H), 7.04 (d, *J* = 7.8 Hz, 1H), 2.39 (s, 3H).

$^{13}\text{C}$  NMR (150 MHz,  $\text{CDCl}_3$ )  $\delta$  144.5, 138.7, 136.0, 134.2, 130.5, 130.1, 129.9, 129.7, 129.6, 129.5, 128.7, 128.2, 21.6. IR (KBr,  $\text{cm}^{-1}$ ) 2141 ( $\text{N}_3$ ).

---

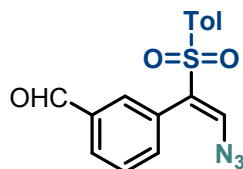

**(3n).** Colorless oil (65% yield);  $^1\text{H}$  NMR (600 MHz,  $\text{CDCl}_3$ )  $\delta$  9.94 (s, 1H), 7.92 (s, 1H), 7.86 (d,  $J$  = 6.6 Hz, 1H), 7.60 (s, 1H), 7.51 – 7.45 (m, 4H), 7.20 (d,  $J$  = 8.1 Hz, 2H), 2.38 (s, 3H).  $^{13}\text{C}$  NMR (150 MHz,  $\text{CDCl}_3$ )  $\delta$  191.6, 144.7, 139.0, 136.4, 136.3, 135.9, 132.2, 130.0, 129.9, 129.7, 129.6, 129.1, 128.1, 21.6. IR (KBr,  $\text{cm}^{-1}$ ) 2174 ( $\text{N}_3$ ).

---

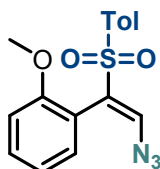

**(3o).** Colorless oil (65% yield);  $^1\text{H}$  NMR (600 MHz,  $\text{CDCl}_3$ )  $\delta$  7.68 (s, 1H), 7.48 (d,  $J$  = 8.4 Hz, 2H), 7.33 (t,  $J$  = 7.8 Hz, 1H), 7.33 (t,  $J$  = 7.8 Hz, 3H), 6.94 (t,  $J$  = 7.8 Hz, 1H), 6.71 (d,  $J$  = 8.4 Hz, 1H), 3.35 (s, 3H), 2.38 (s, 3H).  $^{13}\text{C}$  NMR (150 MHz,  $\text{CDCl}_3$ )  $\delta$  157.3, 143.8, 138.7, 136.6, 132.5, 131.4, 129.0, 128.5, 127.9, 120.4, 116.6, 110.5, 55.1, 21.5. IR (KBr,  $\text{cm}^{-1}$ ) 2134 ( $\text{N}_3$ ).

---

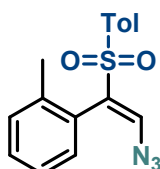

**(3p).** Colorless oil (60% yield);  $^1\text{H}$  NMR (600 MHz,  $\text{CDCl}_3$ )  $\delta$  7.75 (s, 1H), 7.46 (d,  $J$  = 7.8 Hz, 2H), 7.26-7.24 (m, 1H), 7.21 (d,  $J$  = 8.4 Hz, 2H), 7.13-7.10 (m, 2H), 6.93 (d,  $J$  = 7.2 Hz, 1H), 2.41 (s, 3H), 1.85 (s, 3H).  $^{13}\text{C}$  NMR (150 MHz,  $\text{CDCl}_3$ )  $\delta$  144.4, 138.6, 138.2, 136.0, 131.2, 130.7, 129.9, 129.7, 129.5, 128.5, 127.3, 125.5, 21.6, 19.1. IR (KBr,  $\text{cm}^{-1}$ ) 2132 ( $\text{N}_3$ ).

---

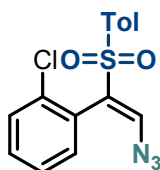

**(3q).** Colorless oil (75% yield);  $^1\text{H}$  NMR (600 MHz,  $\text{CDCl}_3$ )  $\delta$  7.80 (s, 1H), 7.47 (d,  $J$  = 7.8 Hz, 2H), 7.34-7.26 (m, 4H), 7.20 (d,  $J$  = 7.8 Hz, 2H), 2.40 (s, 3H).  $^{13}\text{C}$  NMR (150 MHz,  $\text{CDCl}_3$ )  $\delta$

144.5, 139.7, 135.9, 135.2, 133.0, 131.0, 129.5, 129.4, 128.5, 128.1, 127.1, 126.6, 21.6. **IR** (KBr,  $\text{cm}^{-1}$ ) 2174 ( $\text{N}_3$ ).

---

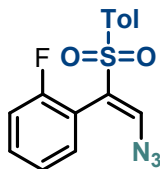

**(3r)**. Colorless oil (70% yield);  **$^1\text{H}$  NMR** (600 MHz,  $\text{CDCl}_3$ )  $\delta$  7.81 (s, 1H), 7.43 (d,  $J = 8.4$  Hz, 2H), 7.28-7.24 (m, 2H), 7.12 (d,  $J = 7.8$  Hz, 2H), 7.08-7.06 (m, 1H), 6.86 (t,  $J = 9.0$  Hz, 1H), 2.32 (s, 3H).  **$^{13}\text{C}$  NMR** (150 MHz,  $\text{CDCl}_3$ )  $\delta$  159.9 (d,  $J = 249.5$  Hz), 144.4, 140.1, 136.1, 132.5 (d,  $J = 1.8$  Hz), 131.7 (d,  $J = 8.3$  Hz), 129.5, 128.1, 124.8, 124.1 (d,  $J = 3.6$  Hz), 116.0 (d,  $J = 15.8$  Hz), 115.4 (d,  $J = 21.5$  Hz), 21.6.  **$^{19}\text{F}$  NMR** (564 MHz,  $\text{CDCl}_3$ )  $\delta$  -112.9. **IR** (KBr,  $\text{cm}^{-1}$ ) 2164 ( $\text{N}_3$ ).

---

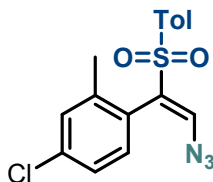

**(3s)**. Colorless oil (62% yield);  **$^1\text{H}$  NMR** (600 MHz,  $\text{CDCl}_3$ )  $\delta$  7.80 (s, 1H), 7.46 (d,  $J = 7.8$  Hz, 2H), 7.23 (d,  $J = 8.4$  Hz, 2H), 7.13-7.10 (m, 2H), 6.87 (d,  $J = 7.8$  Hz, 1H), 2.41 (s, 3H), 1.82 (s, 3H).  **$^{13}\text{C}$  NMR** (150 MHz,  $\text{CDCl}_3$ )  $\delta$  144.7, 140.5, 138.8, 135.8, 135.6, 132.4, 130.0, 129.6, 129.4, 128.4, 125.9, 125.8, 21.7, 19.0. **IR** (KBr,  $\text{cm}^{-1}$ ) 2147 ( $\text{N}_3$ ).

---

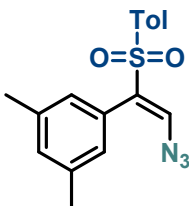

**(3t)**. Colorless oil (70% yield);  **$^1\text{H}$  NMR** (600 MHz,  $\text{CDCl}_3$ )  $\delta$  7.73 (s, 1H), 7.47 (d,  $J = 8.4$  Hz, 2H), 7.21 (d,  $J = 7.8$  Hz, 2H), 6.95 (s, 1H), 6.93 (d,  $J = 7.8$  Hz, 1H), 6.80 (d,  $J = 7.8$  Hz, 1H), 2.41 (s, 3H), 2.30 (m, 3H), 1.81 (m, 3H).  **$^{13}\text{C}$  NMR** (150 MHz,  $\text{CDCl}_3$ )  $\delta$  144.3, 139.8, 138.3, 138.2, 136.1, 131.0, 130.8, 129.5, 128.5, 126.4, 124.3, 21.6, 21.3, 19.0. **IR** (KBr,  $\text{cm}^{-1}$ ) 2181 ( $\text{N}_3$ ).

---

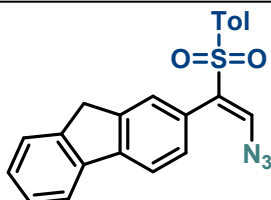

**(3u).** Colorless oil (92% yield);  $^1\text{H NMR}$  (600 MHz,  $\text{CDCl}_3$ )  $\delta$  7.83 (s, 1H), 7.75 (d,  $J = 7.8$  Hz, 1H), 7.67 (d,  $J = 7.8$  Hz, 1H), 7.54 (d,  $J = 7.2$  Hz, 1H), 7.50 (d,  $J = 7.8$  Hz, 1H), 7.40 (s, 1H), 7.37 (t,  $J = 7.2$  Hz, 1H), 7.34-7.31(m, 1H), 7.17(d,  $J = 7.8$  Hz, 1H), 7.06(d,  $J = 7.8$  Hz, 1H), 3.86(s, 2H), 2.36(s, 3H).  $^{13}\text{C NMR}$  (150 MHz,  $\text{CDCl}_3$ )  $\delta$  144.2, 143.6, 143.2, 142.9, 140.8, 137.8, 136.2, 131.9, 129.5, 129.3, 128.2, 127.4, 127.1, 126.9, 126.3, 125.1, 120.2, 119.6, 36.9, 21.6. **IR** (KBr,  $\text{cm}^{-1}$ ) 2179 ( $\text{N}_3$ ).

---

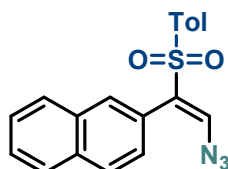

**(3v).** Colorless oil (75% yield);  $^1\text{H NMR}$  (600 MHz,  $\text{CDCl}_3$ )  $\delta$  7.90 (s, 1H), 7.80 (d,  $J = 7.8$  Hz, 1H), 7.77-7.74 (m, 2H), 7.69 (s, 1H), 7.52-7.47 (m, 4H), 7.19 (d,  $J = 8.4$  Hz, 1H), 7.15 (d,  $J = 8.4$  Hz, 2H), 2.35(s, 3H).  $^{13}\text{C NMR}$  (150 MHz,  $\text{CDCl}_3$ )  $\delta$  144.3, 138.3, 136.3, 133.3, 132.8, 131.4, 130.5, 129.6, 128.5, 128.2, 128.0, 127.7, 127.4, 127.0, 126.4, 125.7, 21.6. **IR** (KBr,  $\text{cm}^{-1}$ ) 2157 ( $\text{N}_3$ ).

---

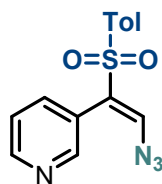

**(3w).** Colorless oil (65% yield);  $^1\text{H NMR}$  (600 MHz,  $\text{CDCl}_3$ )  $\delta$  8.56 (d,  $J = 4.2$  Hz, 1H), 8.19 (s, 1H), 7.95 (s, 1H), 7.66 (d,  $J = 7.8$  Hz, 1H), 7.49 (d,  $J = 7.8$  Hz, 2H), 7.30-7.27 (m, 1H), 7.21 (d,  $J = 7.8$  Hz, 2H), 2.38 (s, 3H).  $^{13}\text{C NMR}$  (150 MHz,  $\text{CDCl}_3$ )  $\delta$  150.7, 150.1, 144.7, 139.5, 138.0, 135.7, 129.8, 128.0, 127.9, 125.0, 123.2, 21.6. **IR** (KBr,  $\text{cm}^{-1}$ ) 2171 ( $\text{N}_3$ ).

---

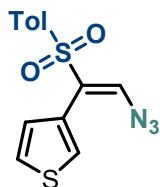

**(3x).** Colorless oil (62% yield);  $^1\text{H NMR}$  (600 MHz,  $\text{CDCl}_3$ )  $\delta$  7.81 (s, 1H), 7.56 (d,  $J = 7.8$  Hz, 2H), 7.47 (d,  $J = 3$  Hz, 1H), 7.26-7.24 (m, 1H), 7.21 (d,  $J = 7.8$  Hz, 2H), 7.11 (d,  $J = 4.8$  Hz, 1H), 2.37 (s, 3H).  $^{13}\text{C NMR}$  (150 MHz,  $\text{CDCl}_3$ )  $\delta$  144.2, 137.4, 136.5, 129.6, 128.6, 127.8, 127.6, 127.4, 126.4, 125.3, 21.6. **IR** (KBr,  $\text{cm}^{-1}$ ) 2137 ( $\text{N}_3$ ).

---



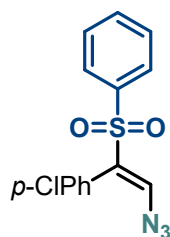

**(4a)**. Colorless oil (65% yield);  $^1\text{H NMR}$  (600 MHz,  $\text{CDCl}_3$ )  $\delta$  7.86 (s, 1H), 7.61(d,  $J = 7.8$  Hz, 2H), 7.55 (t,  $J = 7.8$  Hz, 1H), 7.42 (d,  $J = 7.8$  Hz, 2H), 7.27 (d,  $J = 8.4$  Hz, 2H), 7.07 (d,  $J = 8.4$  Hz, 2H).  $^{13}\text{C NMR}$  (150 MHz,  $\text{CDCl}_3$ )  $\delta$  139.9, 138.9, 135.7, 133.4, 131.8, 129.9, 129.0, 128.7, 128.1, 126.6. **IR** (KBr,  $\text{cm}^{-1}$ ) 2180 ( $\text{N}_3$ ).

---

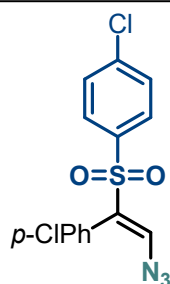

**(4b)**. Colorless oil (68% yield);  $^1\text{H NMR}$  (600 MHz,  $\text{CDCl}_3$ )  $\delta$  7.87 (s, 1H), 7.54 (d,  $J = 8.4$  Hz, 2H), 7.39 (d,  $J = 8.4$  Hz, 2H), 7.29 (d,  $J = 8.4$  Hz, 2H), 7.10 (d,  $J = 7.8$  Hz, 2H).  $^{13}\text{C NMR}$  (150 MHz,  $\text{CDCl}_3$ )  $\delta$  140.2, 139.4, 137.5, 135.8, 131.8, 129.5, 129.4, 129.3, 128.8, 126.3. **IR** (KBr,  $\text{cm}^{-1}$ ) 2158 ( $\text{N}_3$ ).

---

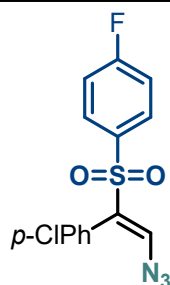

**(4c)**. Colorless oil (72% yield);  $^1\text{H NMR}$  (600 MHz,  $\text{CDCl}_3$ )  $\delta$  7.86 (s, 1H), 7.63–7.61 (m, 2H), 7.29 (d,  $J = 8.4$  Hz, 2H), 7.09 (t,  $J = 7.8$  Hz, 4H).  $^{13}\text{C NMR}$  (150 MHz,  $\text{CDCl}_3$ )  $\delta$  165.6 (d,  $J = 255$  Hz), 139.0, 135.8, 134.9 (d,  $J = 3.6$  Hz), 131.8, 131.0 (d,  $J = 9.6$  Hz), 129.7, 128.8, 126.5, 116.4(d,  $J = 22.7$  Hz). **IR** (KBr,  $\text{cm}^{-1}$ ) 2163 ( $\text{N}_3$ ).

---

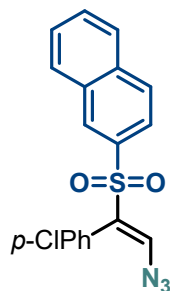

**(4d).** Colorless oil (72% yield);  $^1\text{H NMR}$  (600 MHz,  $\text{CDCl}_3$ )  $\delta$  8.59 (d,  $J = 8.4$  Hz, 1H), 8.03 (d,  $J = 6.6$  Hz, 2H), 7.98 (d,  $J = 7.2$  Hz, 1H), 7.92 (d,  $J = 7.8$  Hz, 1H), 7.67 (t,  $J = 7.8$  Hz, 1H), 7.61 (t,  $J = 7.8$  Hz, 1H), 7.40 (t,  $J = 7.2$  Hz, 1H), 7.11 (d,  $J = 8.4$  Hz, 2H), 6.85 (t,  $J = 8.4$  Hz, 2H).  $^{13}\text{C NMR}$  (150 MHz,  $\text{CDCl}_3$ )  $\delta$  138.8, 135.6, 135.3, 133.9, 132.8, 131.7, 131.5, 131.2, 130.5, 129.2, 128.5, 128.3, 126.9, 126.6, 124.2, 123.8. **IR** (KBr,  $\text{cm}^{-1}$ ) 2144 ( $\text{N}_3$ ).

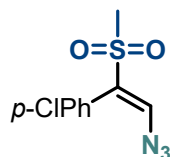

**(4e).** Colorless oil (83% yield);  $^1\text{H NMR}$  (600 MHz,  $\text{CDCl}_3$ )  $\delta$  7.75, 7.46-7.42 (dd,  $J = 8.5, 16.2$ , 4H), 2.80 (s, 3H).  $^{13}\text{C NMR}$  (150 MHz,  $\text{CDCl}_3$ )  $\delta$  139.3, 136.1, 131.5, 129.2, 128.6, 126.7, 41.3. **IR** (KBr,  $\text{cm}^{-1}$ ) 2131 ( $\text{N}_3$ ).

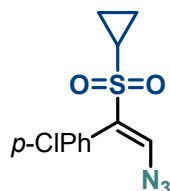

**(4f).** Colorless oil (77% yield);  $^1\text{H NMR}$  (600 MHz,  $\text{CDCl}_3$ )  $\delta$  7.86 (s, 1H), 7.63-7.61 (dd,  $J = 5.0, 9.5$ , 2H), 7.29 (d,  $J = 7.7$  Hz, 2H), 7.09 (m, 4H).  $^{13}\text{C NMR}$  (150 MHz,  $\text{CDCl}_3$ )  $\delta$  138.6, 135.8, 131.8, 128.9, 128.8, 127.2, 30.4, 5.5. **IR** (KBr,  $\text{cm}^{-1}$ ) 2159 ( $\text{N}_3$ ).

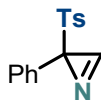

**(5a).** **General procedures for Synthesis of 5a:** **3a** (0.3 mmol) was dissolved in toluene (2.0 mL) in a Schlenk tube, and the solution was irradiated with a high-pressure mercury lamp (100 W). After 3 hours, the mixture was concentrated under vacuum and purified by column chromatography on silica gel with petroleum ether and ethyl acetate to afford **5a** (74%) as a colorless crystal;  $^1\text{H NMR}$  (600 MHz,  $\text{CDCl}_3$ )  $\delta$ . 7.60 (d,  $J = 7.9$  Hz, 2H), 7.45 (t,  $J = 7.5$  Hz, 1 H),

7.38 (t,  $J = 7.8$  Hz, 2H), 7.32-7.29 (m, 4H), 5.10 (s, 1H), 2.46 (s, 3H).  $^{13}\text{C}$  NMR (150 MHz,  $\text{CDCl}_3$ )  $\delta$ . 146.7, 130.5, 130.1, 129.8, 129.8, 129.0, 125.6, 113.5, 63.1, 21.8. HRMS (ESI)  $m/z$  calcd. for  $\text{C}_{15}\text{H}_{13}\text{NO}_2\text{SNa}$   $[\text{M}+\text{Na}]^+$  294.3238, found 294.3230.

---

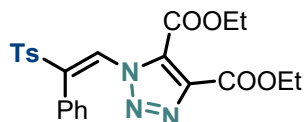

**(5b). General procedures for Synthesis of 5b:** **3a** (0.3 mmol), Dimethyl acetylenedicarboxylate (0.36 mmol) in water (5 mL) at 70 °C. After work-up, the crude residue was purified by flash column chromatography on silica gel (PE : EA = 5 : 1) to give **5b** (85%) as a colorless crystal;  $^1\text{H}$  NMR (600 MHz,  $\text{CDCl}_3$ )  $\delta$  8.56 (s, 1H), 7.53 (d,  $J = 8.1$  Hz, 2H), 7.31 (t,  $J = 7.3$  Hz, 1H), 7.24-7.20 (m, 4H), 7.0 (d,  $J = 7.5$  Hz, 2 H), 4.48 (q,  $J = 6.9$ , 13.8, 2H), 4.39 (q,  $J = 6.9$  Hz, 13.8 Hz, 2H), 2.40 (s, 3H), 1.45 (t,  $J = 7.2$  Hz, 3H), 1.36 (t,  $J = 7.2$  Hz, 3H).  $^{13}\text{C}$  NMR (150 MHz,  $\text{CDCl}_3$ )  $\delta$  159.3, 157.3, 145.3, 142.9, 139.7, 134.2, 131.0, 130.0, 129.8, 129.7, 128.9, 128.3, 128.1, 127.7, 63.5, 62.0, 21.7, 14.0, 13.9. HRMS (ESI)  $m/z$  calcd. for  $\text{C}_{19}\text{H}_{18}\text{F}_2\text{N}_4\text{ONa}$   $[\text{M}+\text{Na}]^+$   $\text{C}_{23}\text{H}_{23}\text{N}_3\text{O}_6\text{SNa}$ , 469.5120, found 469.5124.

---

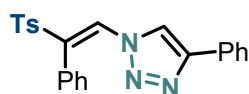

**(5c). General procedures for Synthesis of 5c:** **3a** (0.3 mmol), CuTc (30% mmol), phenylacetylene (0.6 mmol) in toluene (3 ml) at 25 °C. After work-up, the crude residue was purified by flash column chromatography on silica gel (PE : EA = 9 : 1) to give **5c** (70%) as a colorless crystal;  $^1\text{H}$  NMR (600 MHz,  $\text{CDCl}_3$ )  $\delta$  8.79 (s, 1H), 7.56-7.51 (m, 5H), 7.43 (t,  $J = 7.6$  Hz, 2H), 7.35-7.30 (m, 3H), 7.25 (d,  $J = 7.8$  Hz, 2H), 7.09 (d,  $J = 7.8$  Hz, 2H), 6.86 (s, 1H), 2.42 (s, 3H).  $^{13}\text{C}$  NMR (150 MHz,  $\text{CDCl}_3$ )  $\delta$  148.2, 145.1, 134.8, 133.0, 131.2, 130.5, 130.3, 129.7, 129.6, 129.5, 129.1, 128.9, 128.9, 128.5, 125.9, 117.4, 21.7. HRMS (ESI)  $m/z$  calcd. for :  $\text{C}_{23}\text{H}_{19}\text{N}_3\text{O}_2\text{SNa}$   $[\text{M}+\text{Na}]^+$  424.4738, found 424.4732.

---

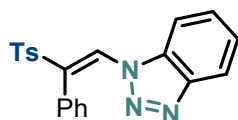

**(5d). General procedures for synthesis of 5d:** **3a** (0.3 mmol), (trimethylsilyl)phenyl triflate (1.2 equiv), CsF (0.6 mmol) in MeCN (2 ml) at r.t for 24 h. After work-up, the crude residue was purified by flash column chromatography on silica gel (PE : EA = 9 : 1) to give **5d** (63%) as a

colorless crystal; **<sup>1</sup>H NMR** (600 MHz, CDCl<sub>3</sub>) δ. 8.80 (s, 1H), 8.01 (d, *J* = 8.0 Hz, 1H), 7.56 (d, *J* = 8.3 Hz, 2H), 7.42 – 7.34 (m, 3H), 7.26 (t, *J* = 7.7 Hz, 2H), 7.21 (d, *J* = 8.0 Hz, 2H), 7.16 – 7.14 (m, 3H), 2.39 (s, 3H); **<sup>13</sup>C NMR** (150 MHz, CDCl<sub>3</sub>) δ. 145.7, 144.8, 135.2, 133.9, 132.6, 130.8, 129.7, 129.6, 129.5, 128.9, 128.7, 128.5, 125.2, 120.4, 110.3, 21.6. **HRMS** (ESI) *m/z* calcd. for C<sub>21</sub>H<sub>17</sub>N<sub>3</sub>O<sub>2</sub>SNa [M+Na]<sup>+</sup> 389.4358, found 389.4353.

#### IV. X-ray crystallography of 3h

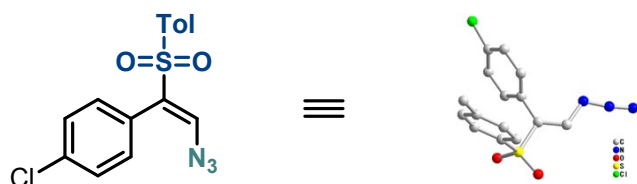

The structure of **3h**

|                                   |                                                                                                           |
|-----------------------------------|-----------------------------------------------------------------------------------------------------------|
| Empirical formula                 | C <sub>15</sub> H <sub>12</sub> ClN <sub>3</sub> O <sub>2</sub> S                                         |
| Temperature                       | 298.15 K                                                                                                  |
| Wavelength                        | 0.71073 Å                                                                                                 |
| Unit cell dimension               | a = 16.0974(10) Å    alpha = 90°.<br>b = 11.1555(8) Å    beta = 90°.<br>c = 17.8712(11) Å    gamma = 90°. |
| Volume                            | 3209.2(4) Å <sup>3</sup>                                                                                  |
| Z                                 | 8                                                                                                         |
| Calculated density                | 1.382 g/cm <sup>3</sup>                                                                                   |
| Absorption coefficient            | 0.377 mm <sup>-1</sup>                                                                                    |
| F(000)                            | 1376.0                                                                                                    |
| Crystal size                      | 0.31 × 0.21 × 0.15 mm <sup>3</sup>                                                                        |
| Theta range for data collection   | 7.306 to 58.538°                                                                                          |
| Reflection collected/unique       | 12699                                                                                                     |
| Data / restraints / parameters    | 3856/0/200                                                                                                |
| Goodness-of-fit on F <sup>2</sup> | 1.048                                                                                                     |
| Final R indices [I >= 2sigma(I)]  | R <sub>1</sub> = 0.0592, wR <sub>2</sub> = 0.1310                                                         |
| Final R indices (all data)        | R <sub>1</sub> = 0.1260, wR <sub>2</sub> = 0.1603                                                         |

#### V. Reference

- [1]. (a) V. V. Zhdankin, C. J. Kuehl, A. P. Krasutsky, M. S. Formanek, J. T. Bolz, *Tetrahedron Lett.* **1994**, *35*, 9677–9680. (b) A. P. Krasutsky, C. J. Kuehl, V. V. Zhdankin, *Synlett* **1995**, 1081–1082. (c) V. V. Zhdankin, A. P. Krasutsky, C. J. Kuehl, A. J. Simonsen, J. K. Woodward, B. Mismash, J. T. Bolz, *J. Am. Chem. Soc.* **1996**, *118*, 5192–5197.

- [2]. Gaussian 16 Revision C.01, M. J. Frisch, G. W. Trucks, H. B. Schlegel, G. E. Scuseria, M. A. Robb, J. R. Cheeseman, G. Scalmani, V. Barone, G. A. Petersson, H. Nakatsuji, X. Li, M. Caricato, A. V. Marenich, J. Bloino, B. G. Janesko, R. Gomperts, B. Mennucci, H. P. Hratchian, J. V. Ortiz, A. F. Izmaylov, J. L. Sonnenberg, D. Williams-Young, F. Ding, F. Lipparini, F. Egidi, J. Goings, B. Peng, A. Petrone, T. Henderson, D. Ranasinghe, V. G. Zakrzewski, J. Gao, N. Rega, G. Zheng, W. Liang, M. Hada, M. Ehara, K. Toyota, R. Fukuda, J. Hasegawa, M. Ishida, T. Nakajima, Y. Honda, O. Kitao, H. Nakai, T. Vreven, K. Throssell, J. A. Montgomery, Jr., J. E. Peralta, F. Ogliaro, M. J. Bearpark, J. J. Heyd, E. N. Brothers, K. N. Kudin, V. N. Staroverov, T. A. Keith, R. Kobayashi, J. Normand, K. Raghavachari, A. P. Rendell, J. C. Burant, S. S. Iyengar, J. Tomasi, M. Cossi, J. M. Millam, M. Klene, C. Adamo, R. Cammi, J. W. Ochterski, R. L. Martin, K. Morokuma, O. Farkas, J. B. Foresman, and D. J. Fox, Gaussian, Inc., Wallingford CT, **2019**.
- [3]. A. D. Becke, *J. Chem. Phys.*, **1993**, *98*, 5648–5652.
- [4]. J. P. Perdew, Y. Wang, *Phys. Rev. B*, **1992**, *45*, 13244–13249.
- [5]. W. Küchle, M. Dolg, H. Stoll, H. Preuss, *J. Chem. Phys.*, **1994**, *100*, 7535–7542.
- [6]. X. Cao, M. Dolg, H. Stoll, *J. Chem. Phys.*, **2003**, *118*, 487–496.
- [7]. A. D. McLean, G. S. Chandler, *J. Chem. Phys.*, 1980, *72*, 5639–5648.
- [8]. W. J. Hehre, R. Ditchfield, J. A. Pople, *J. Chem. Phys.*, 1972, *56*, 2257–2261.
- [9]. C. Gonzalez, H. B. Schlegel, *J. Chem. Phys.*, **1989**, *90*, 2154–2161.
- [10]. C. Gonzalez, H. B. Schlegel, *J. Chem. Phys.*, **1990**, *94*, 5523–5527.
- [11]. A. V. Marenich, C. J. Cramer, D. G. Truhlar, *J. Phys. Chem. B*, **2009**, *113*, 6378–6396.
- [12]. R. A. Marcus, *J. Chem. Phys.*, **1965**, *43*, 679–701.
- [13]. R. A. Marcus, *Faraday Discuss. Chem. Soc.*, **1982**, *74*, 7–15.
- [14]. Y. Li, Y. Liang, J. Dong, Y. Deng, C. Zhao, Z. Su, W. Guan, X. Bi, Q. Liu, J. Fu, *J. Am. Chem. Soc.*, **2019**, *141*, 18475–18485.
- [15]. T. Lu, F. Chen, *J. Comput. Chem.* **2012**, *33*, 580–592. Available at: <http://sobereva.com/multiwfn> (accessed August, 2020).
- [16]. S. Dapprich, G. Frenking, *J. Phys. Chem.* **1995**, *99*, 9352–9362.
- [17]. M. Xiao, T. Lu, *J. Adv. Phys. Chem.* **2015**, *4*, 111–124.
- [18]. C. Y. Legault, CYLview, 1.0b; Université de Sherbrooke: Canada, **2009**. Available at: <http://www.cylview.org> (accessed September, 2014).



## VI. NMR spectra for 3, 4 & 5.

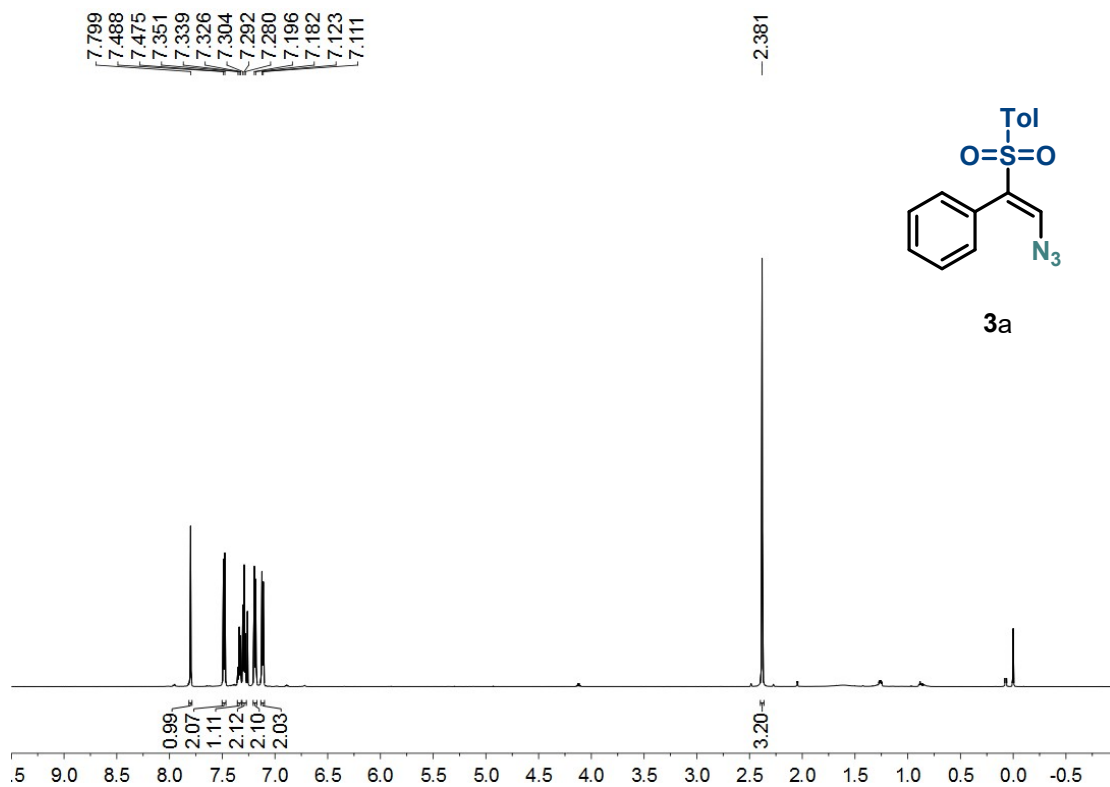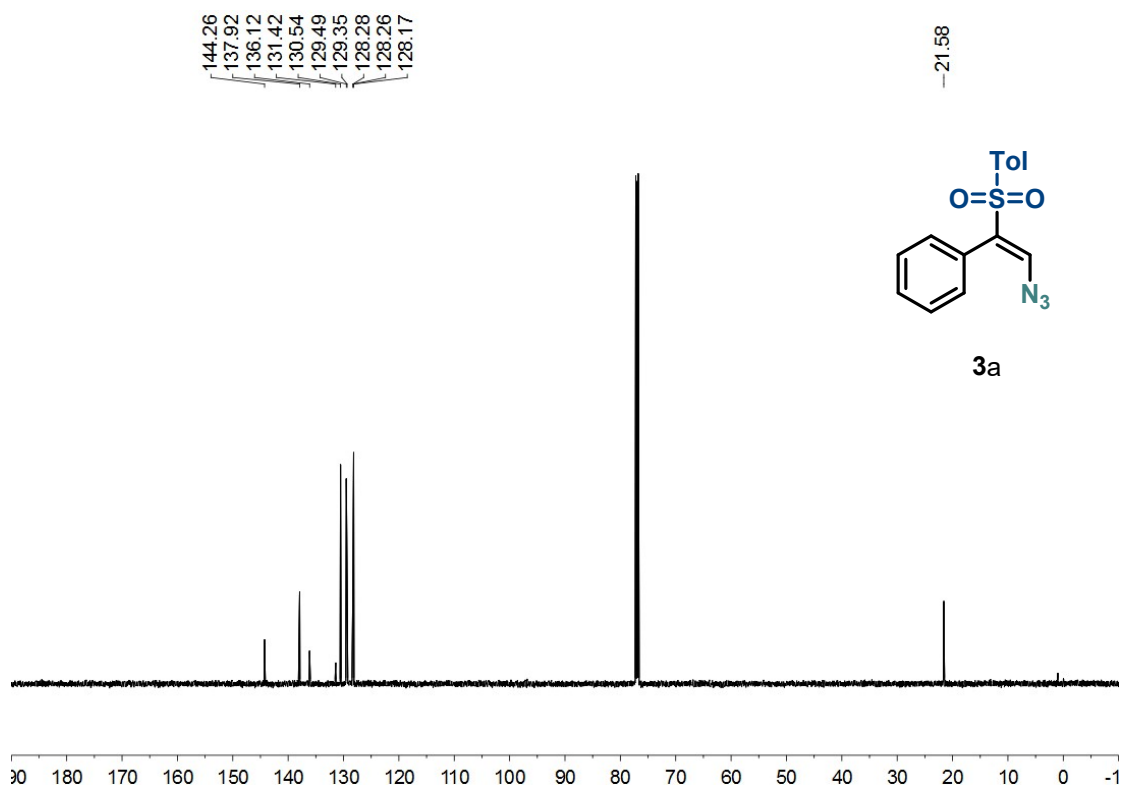



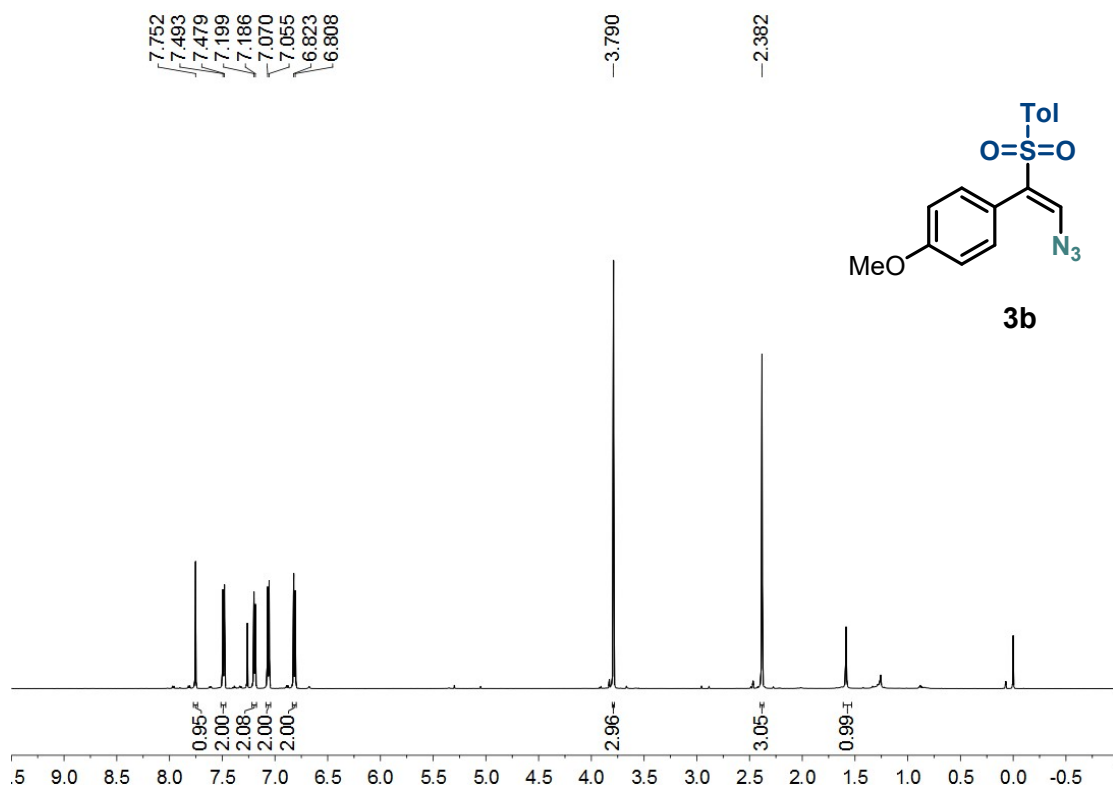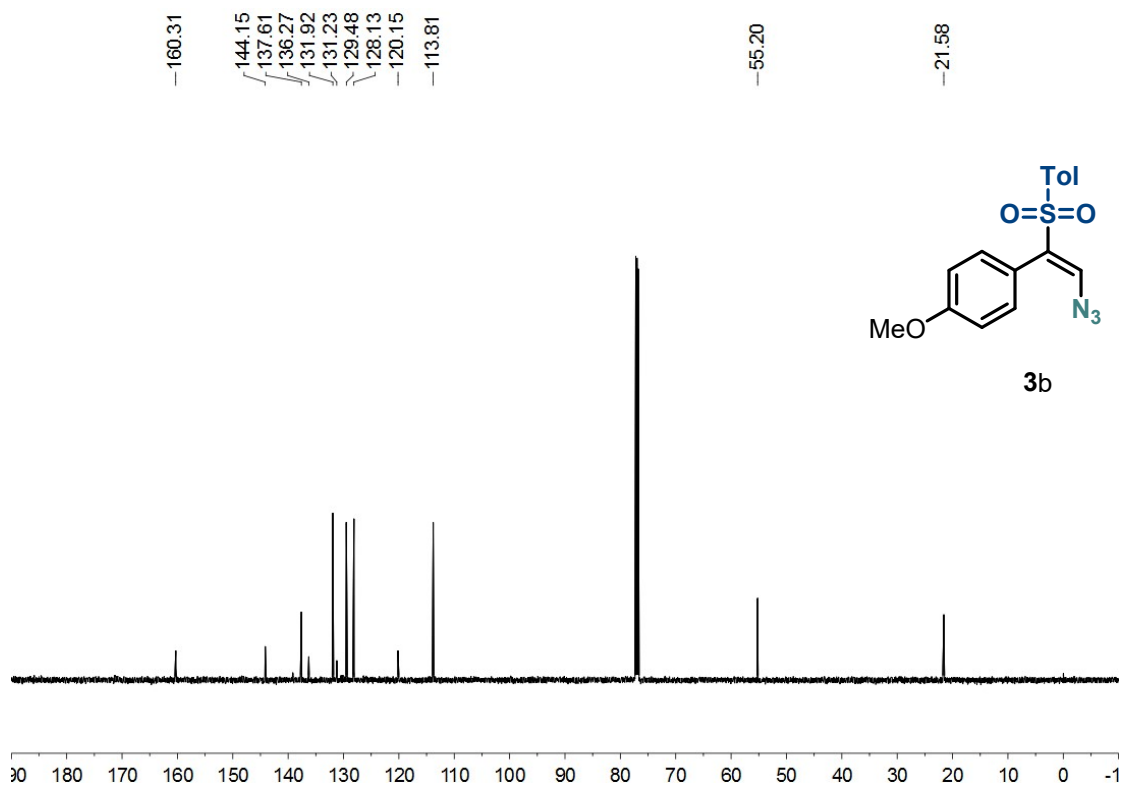

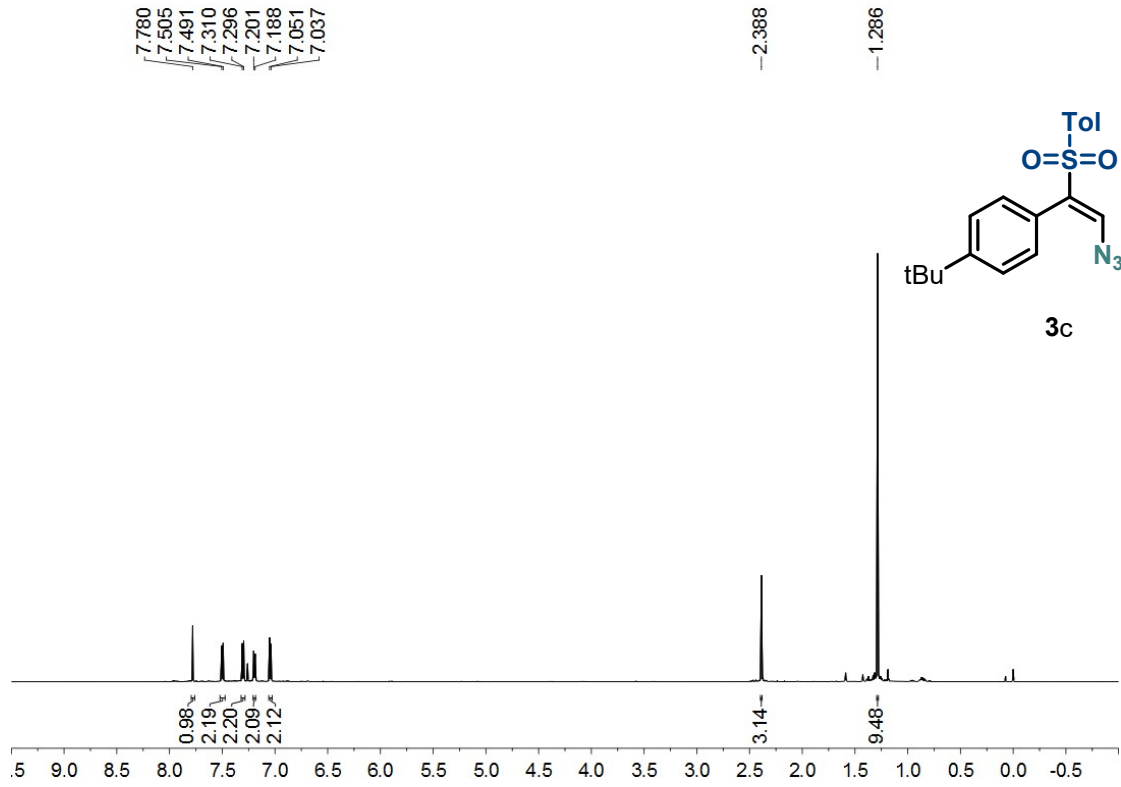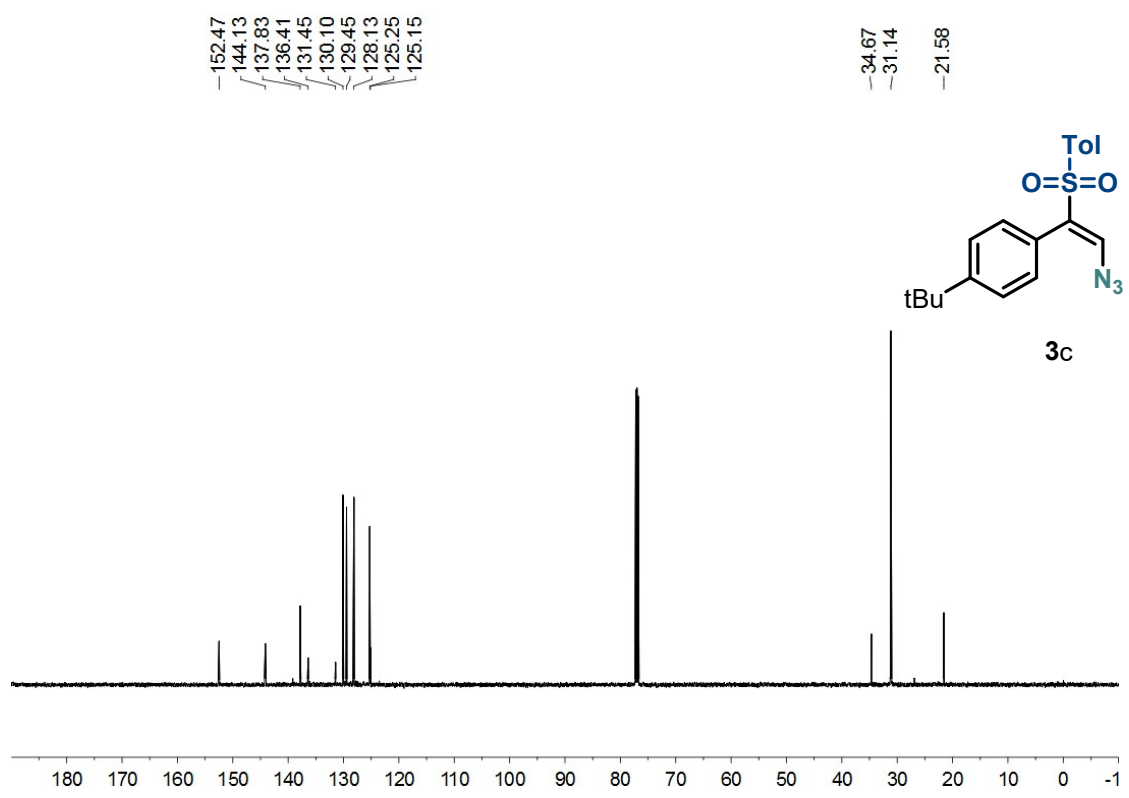

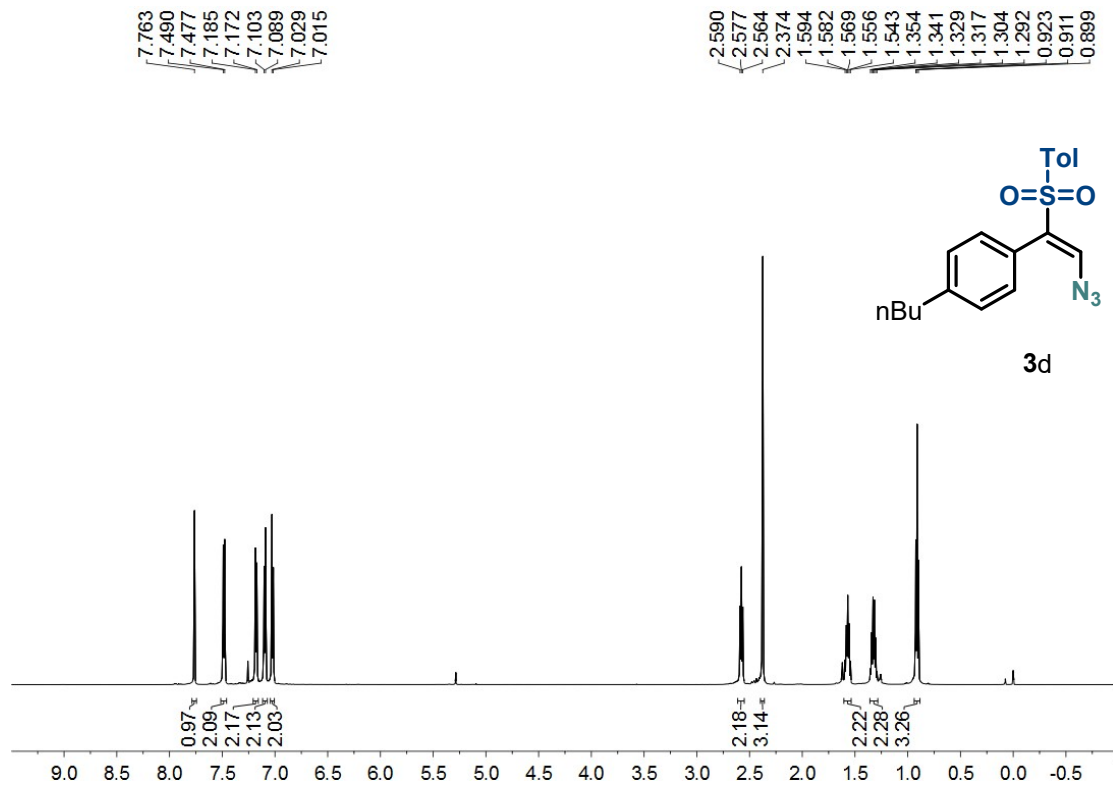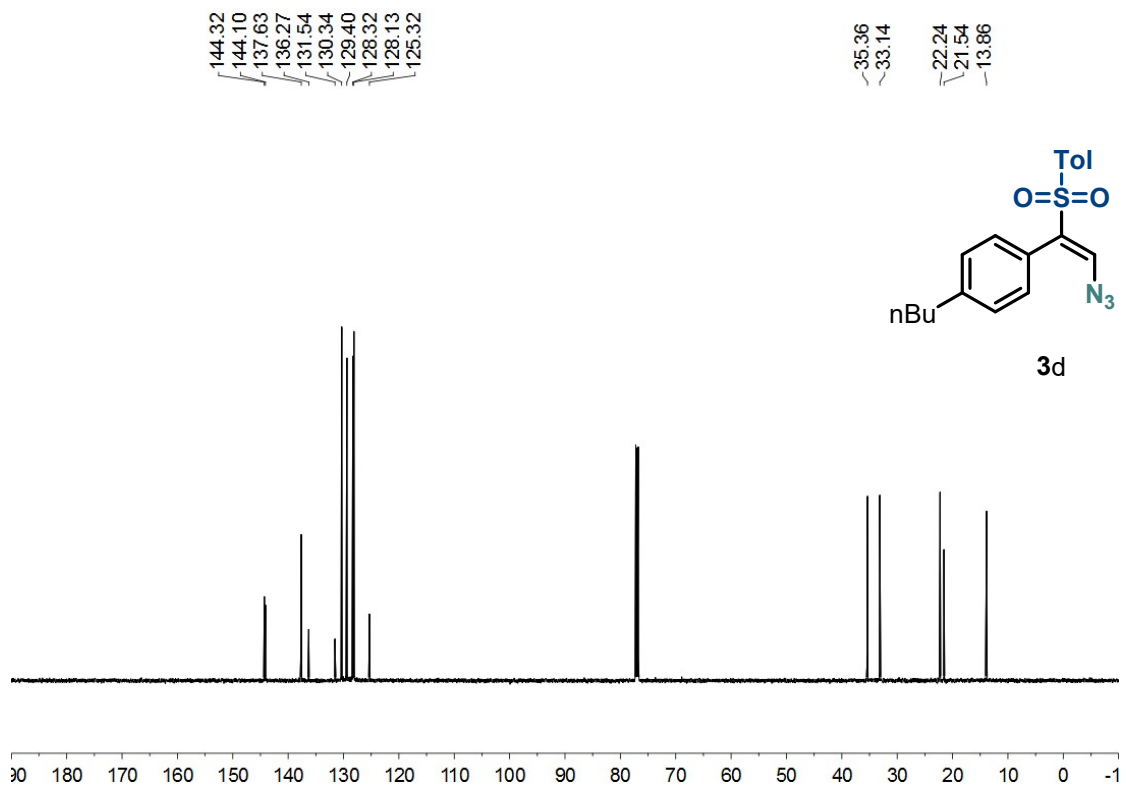

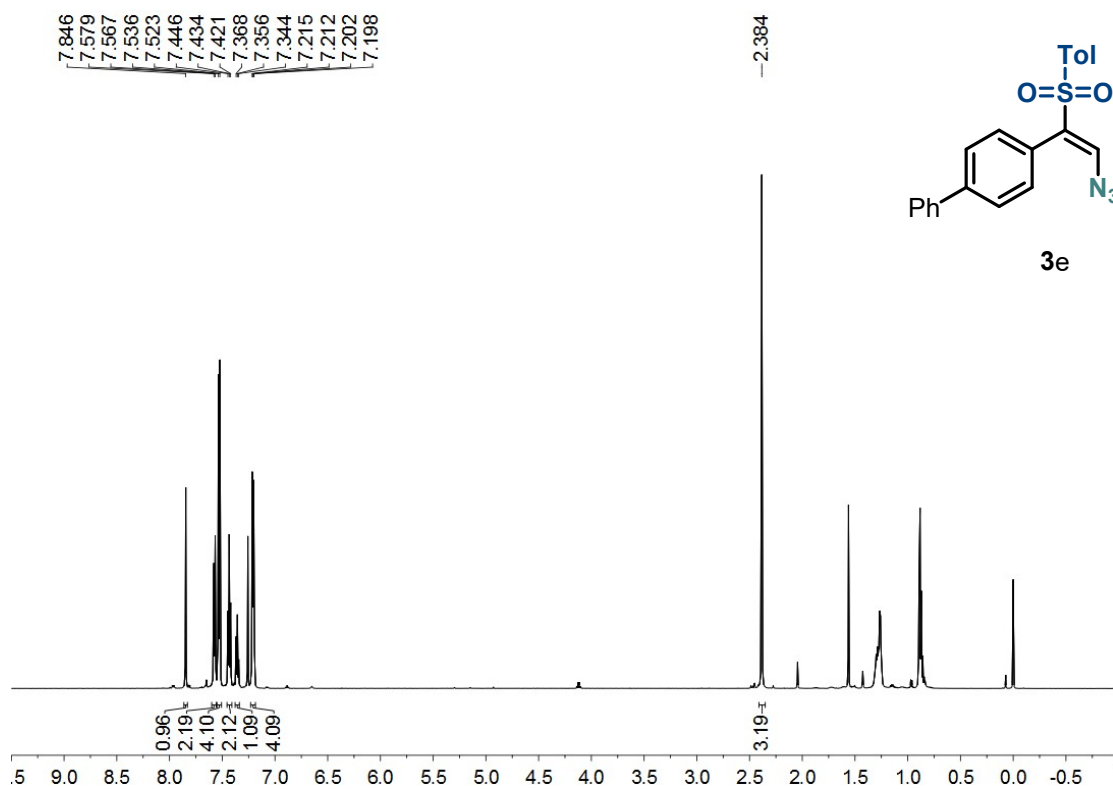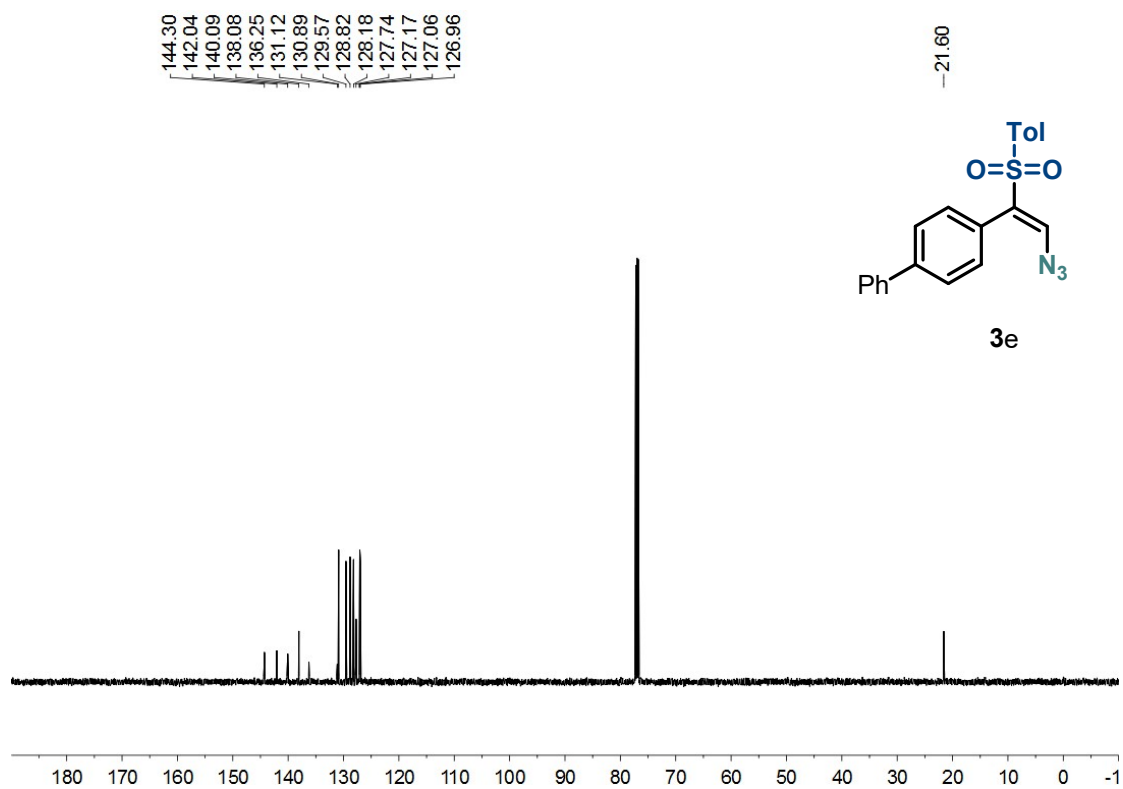

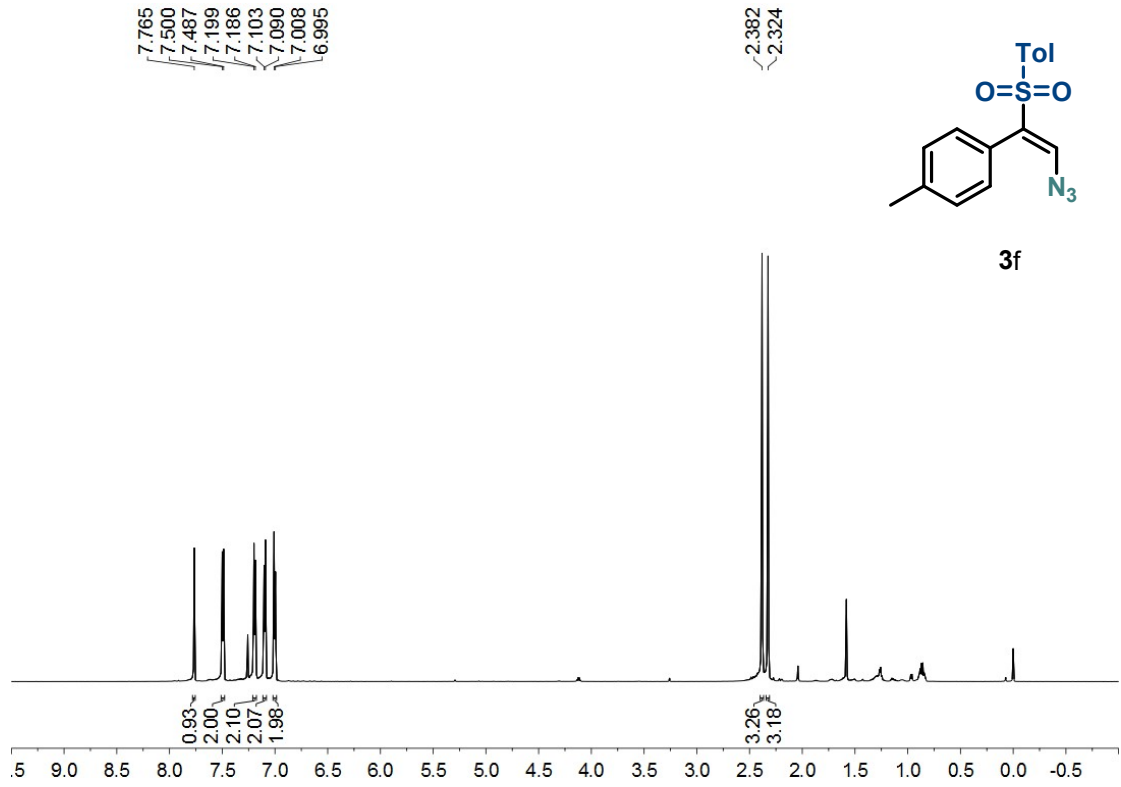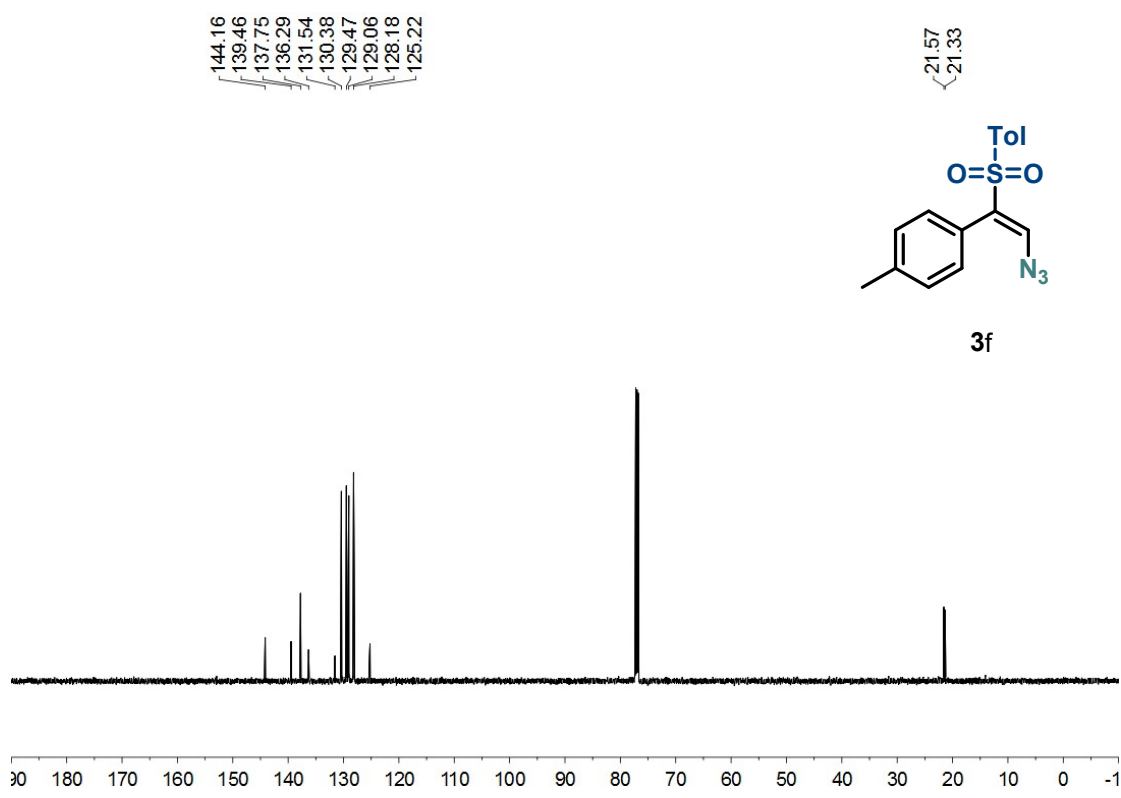

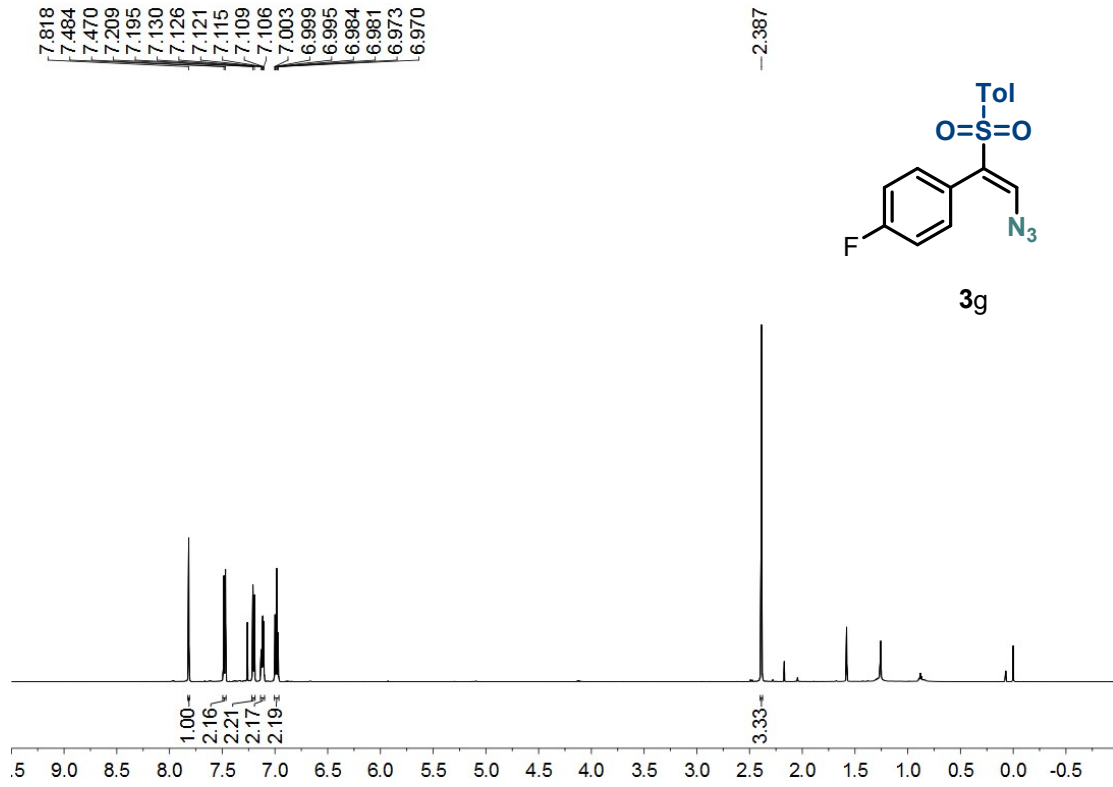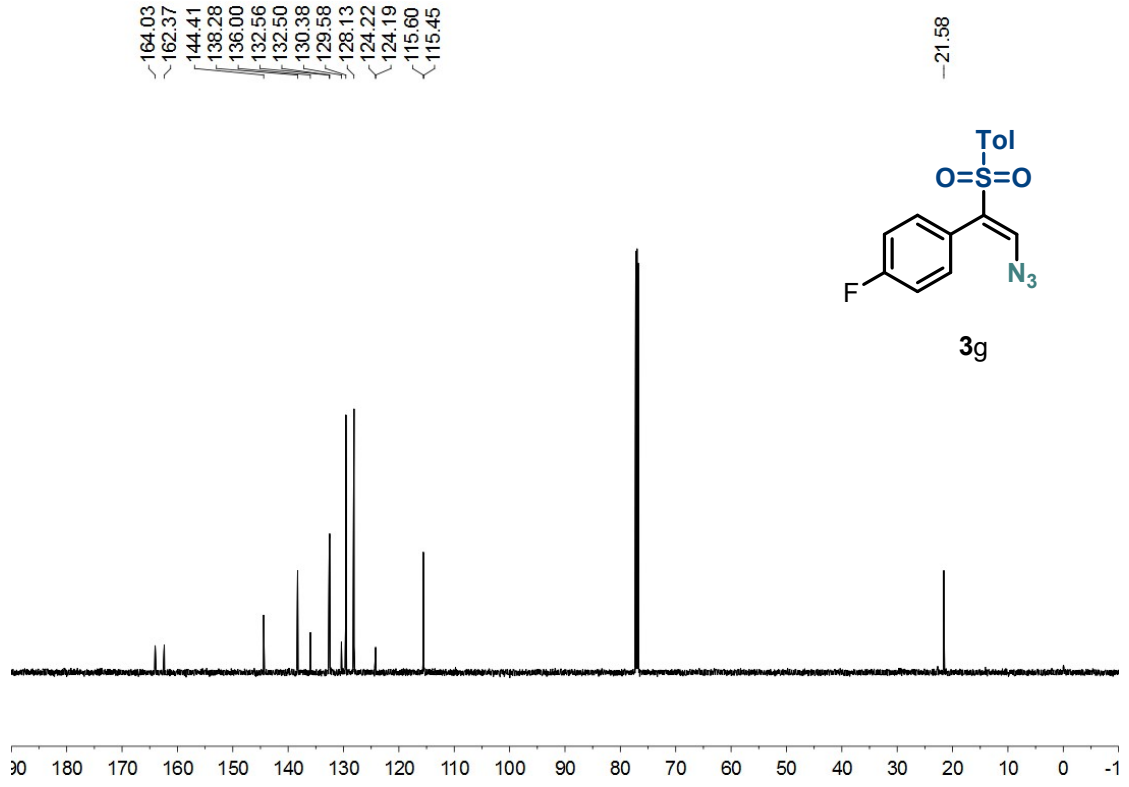

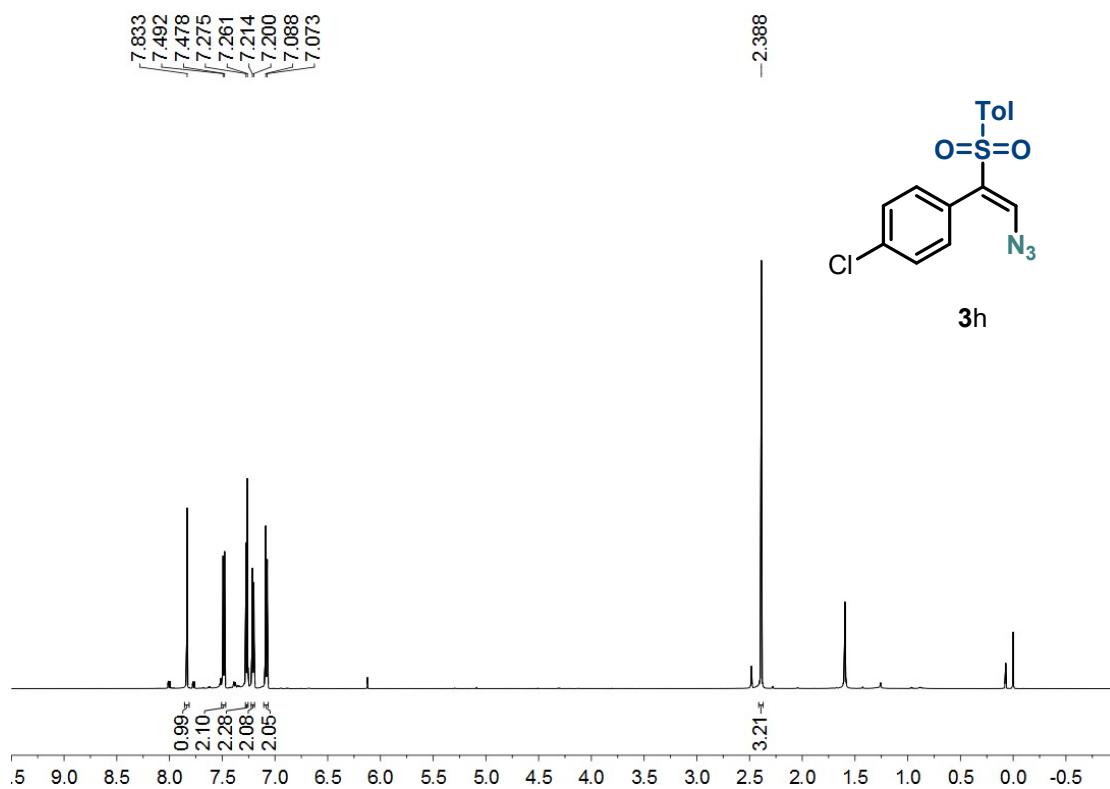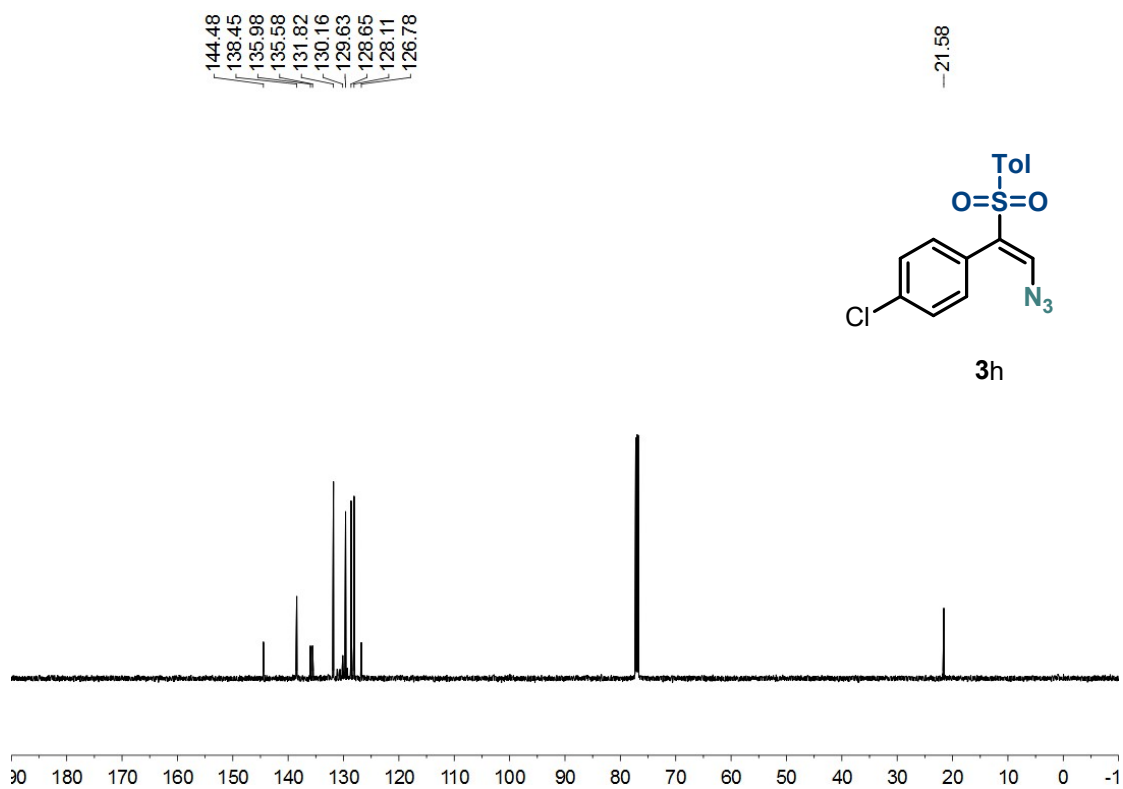

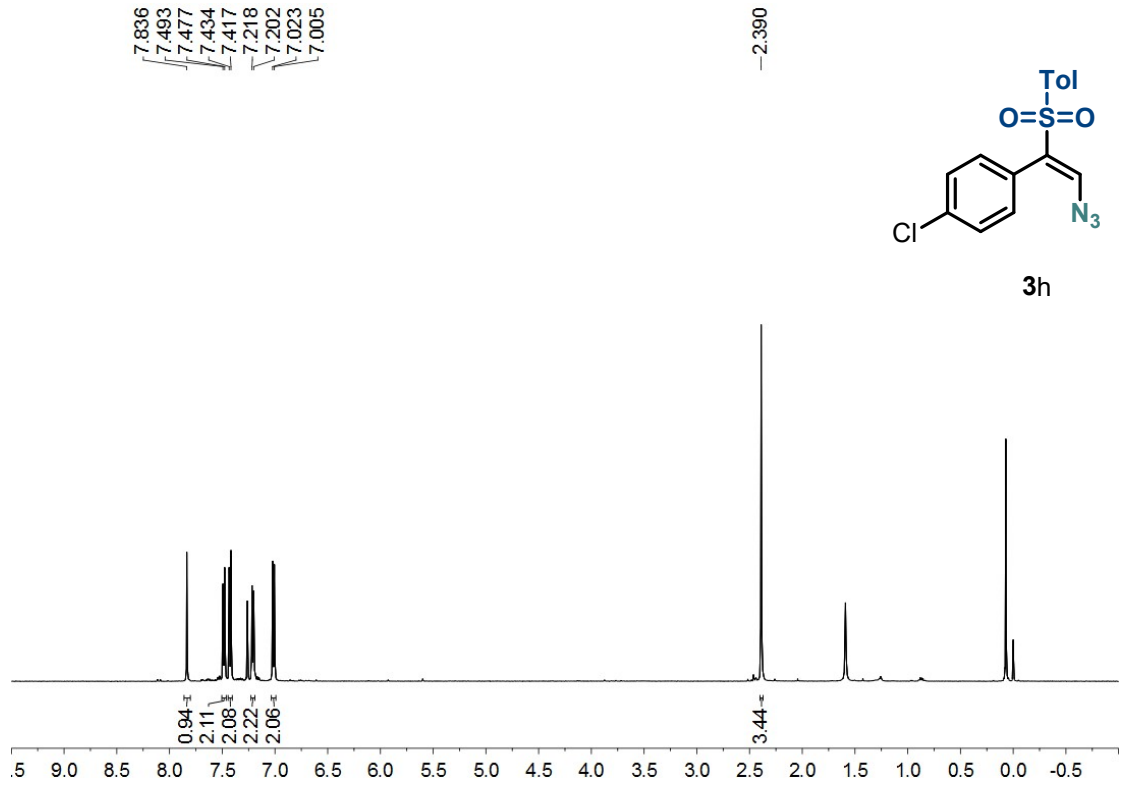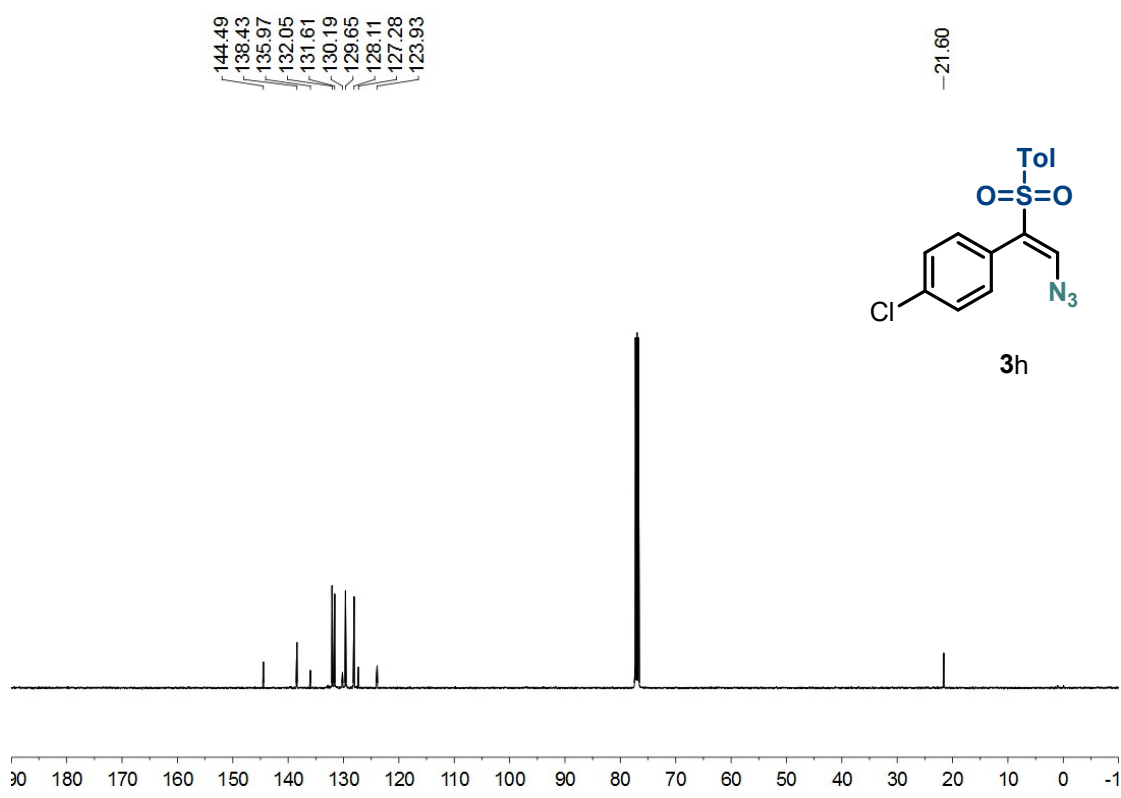



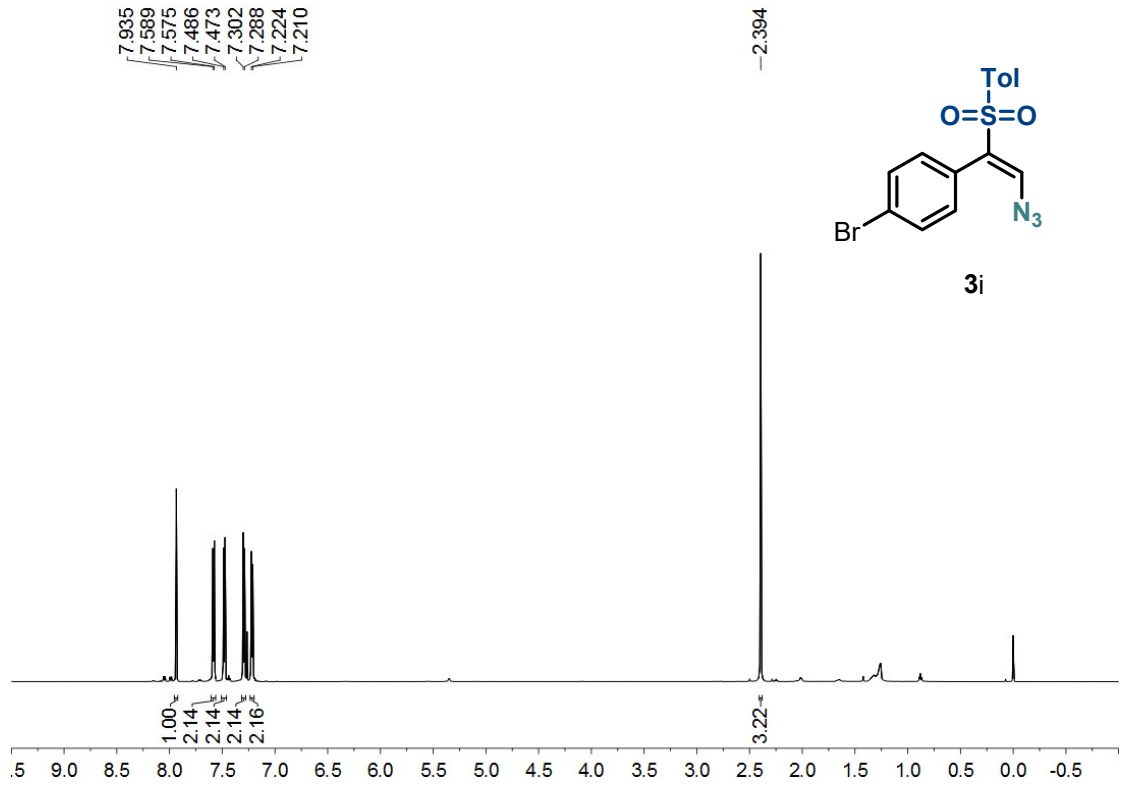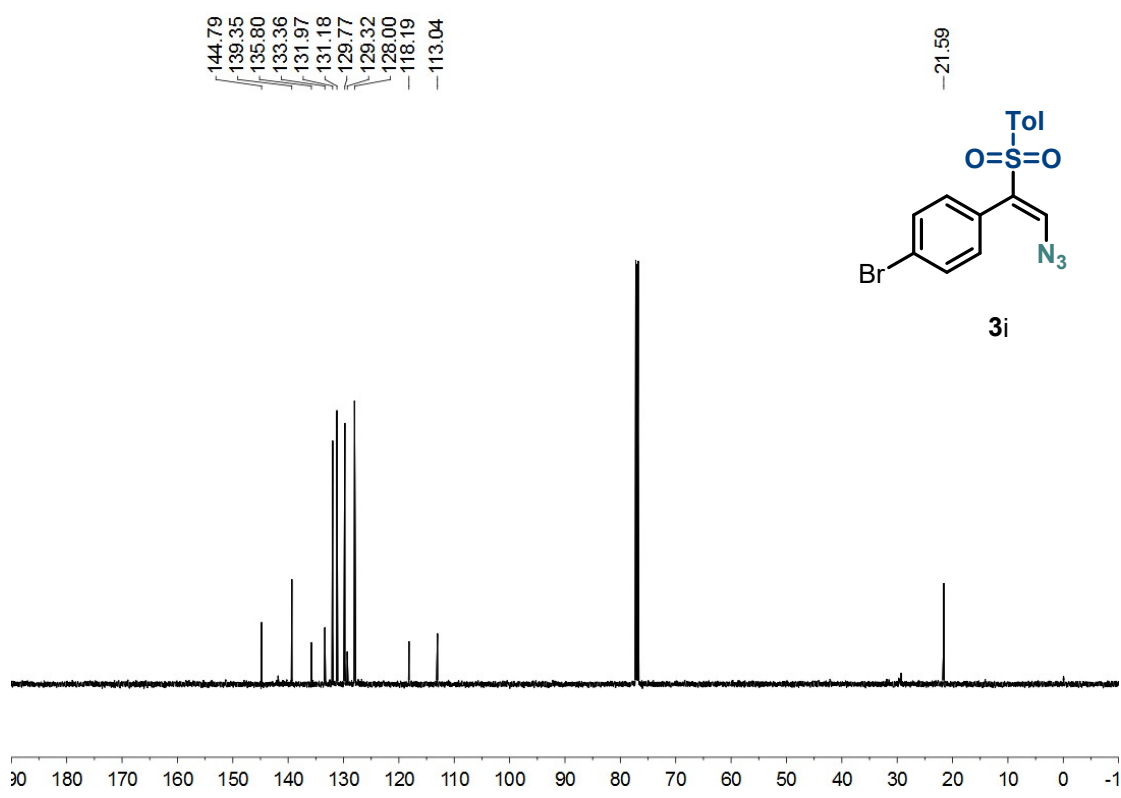

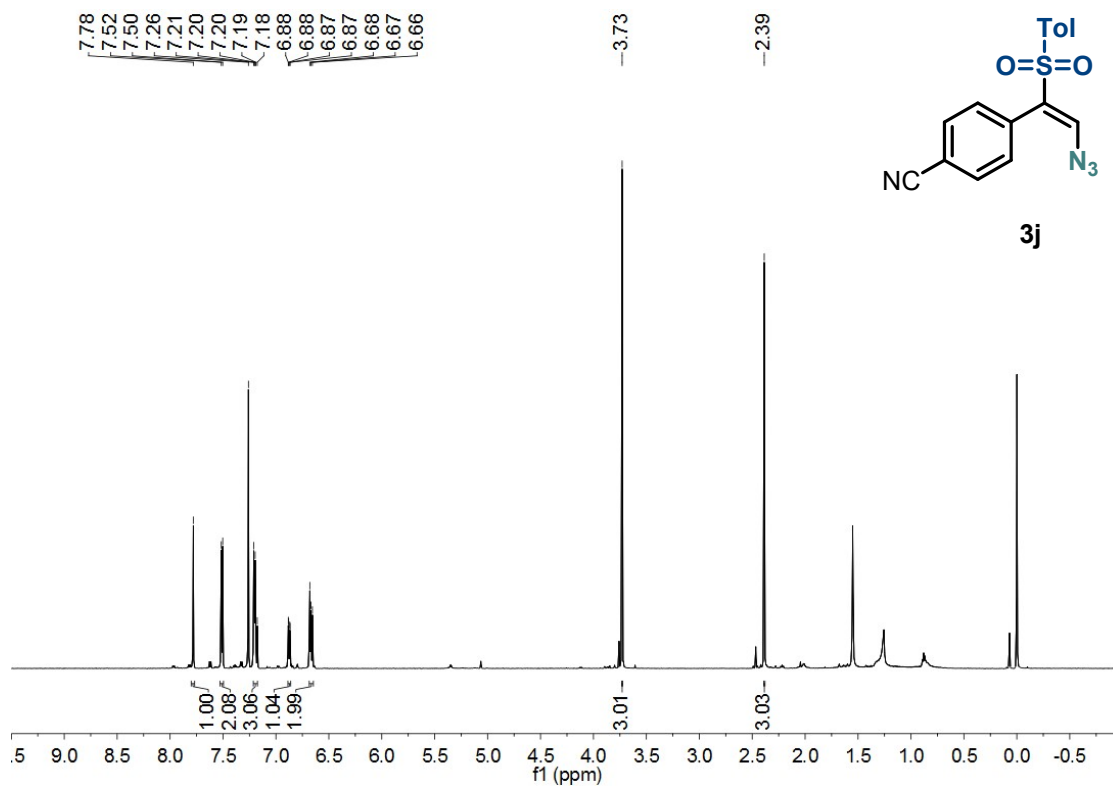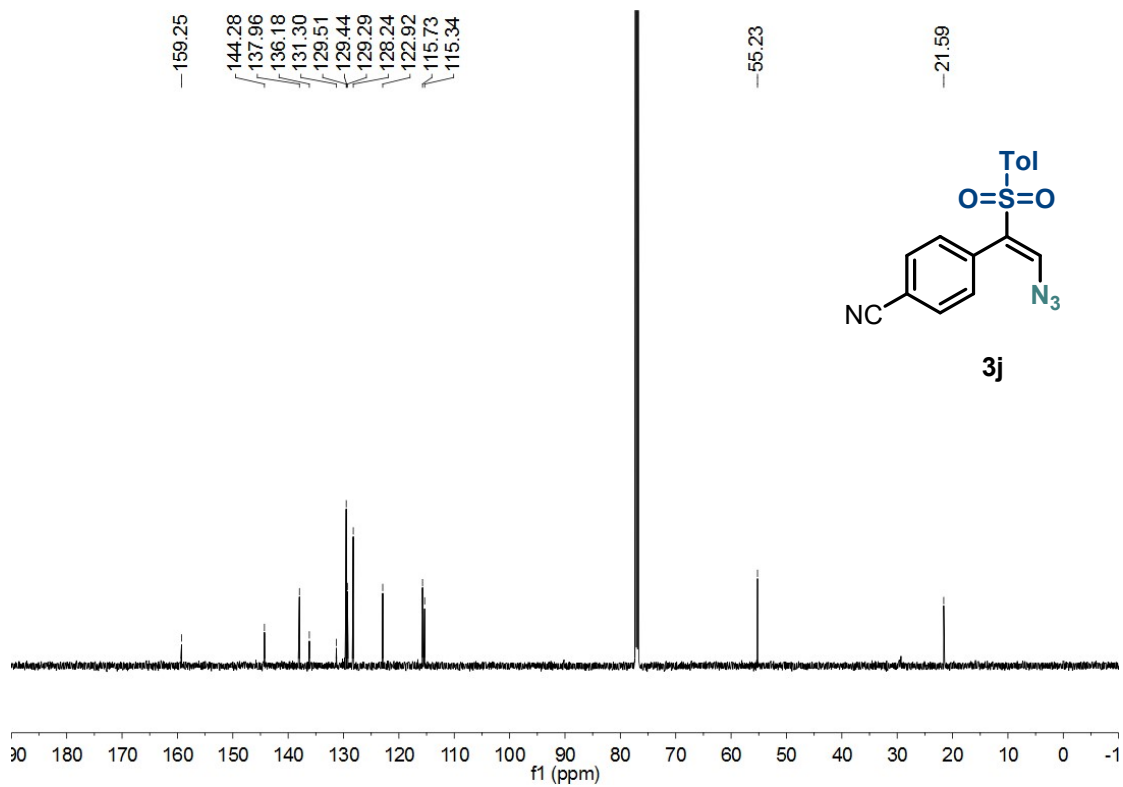

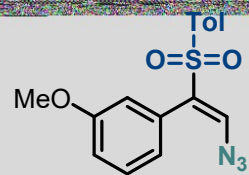

**3k**

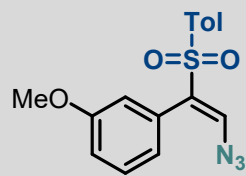

**3k**

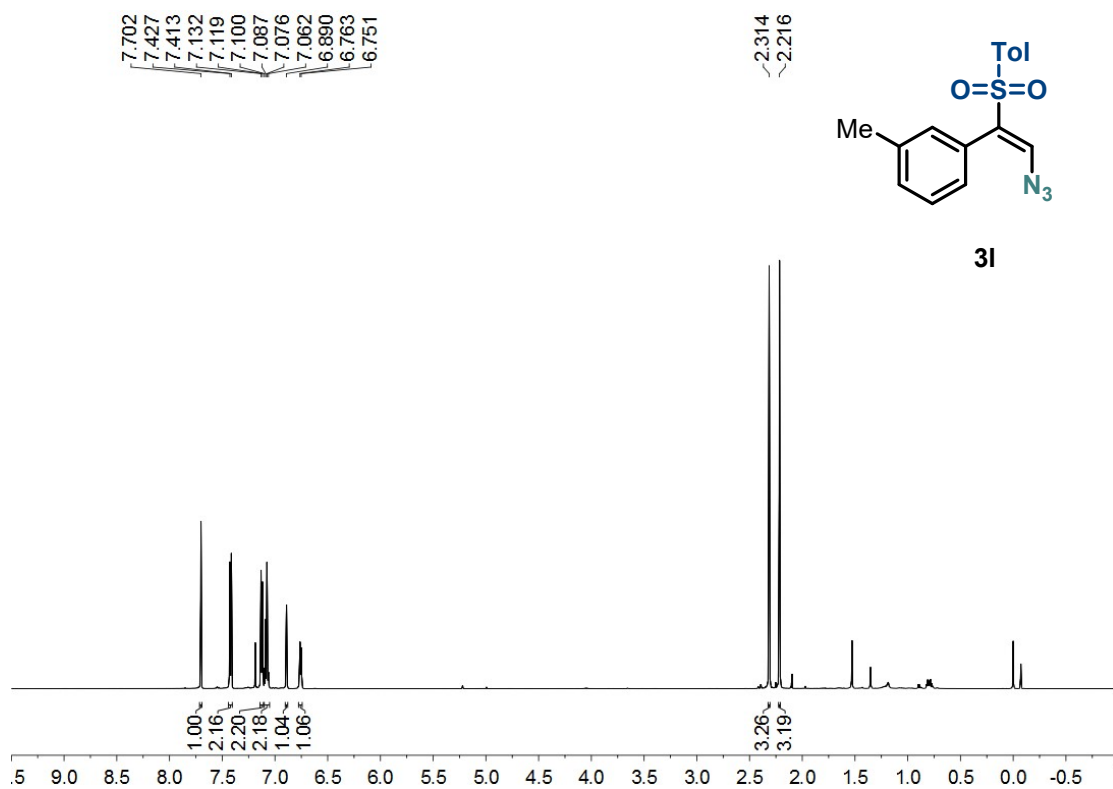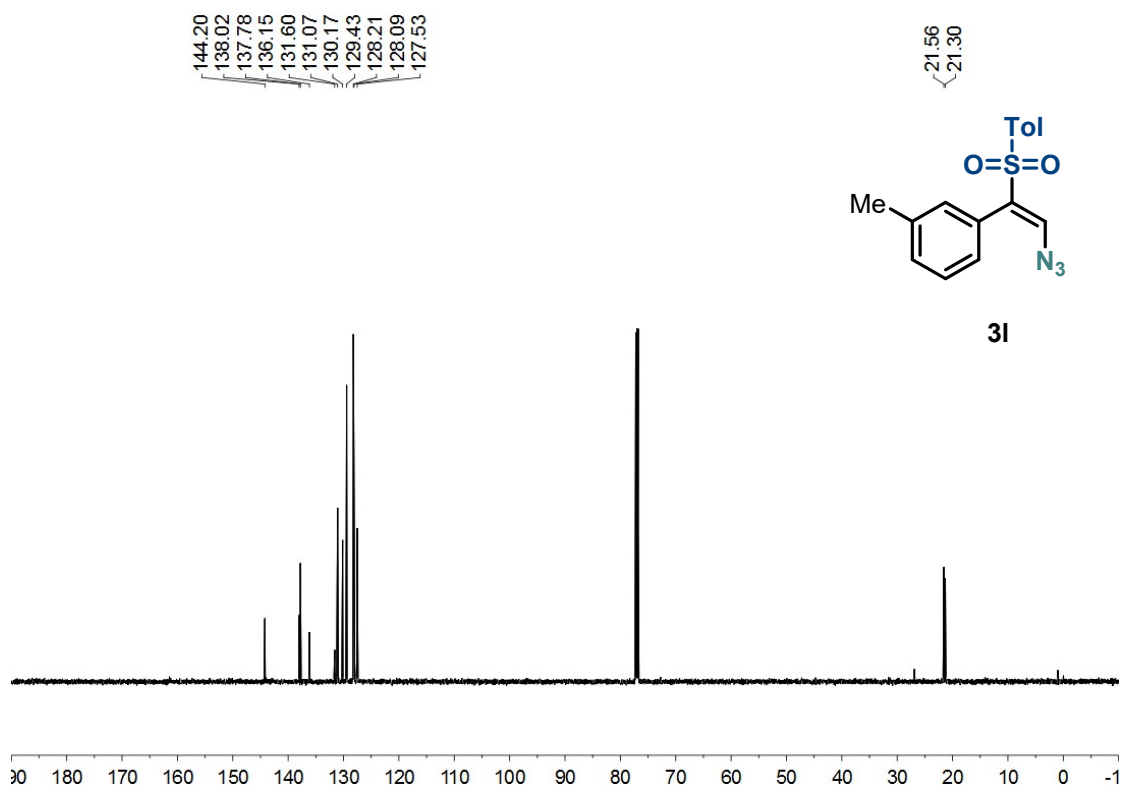

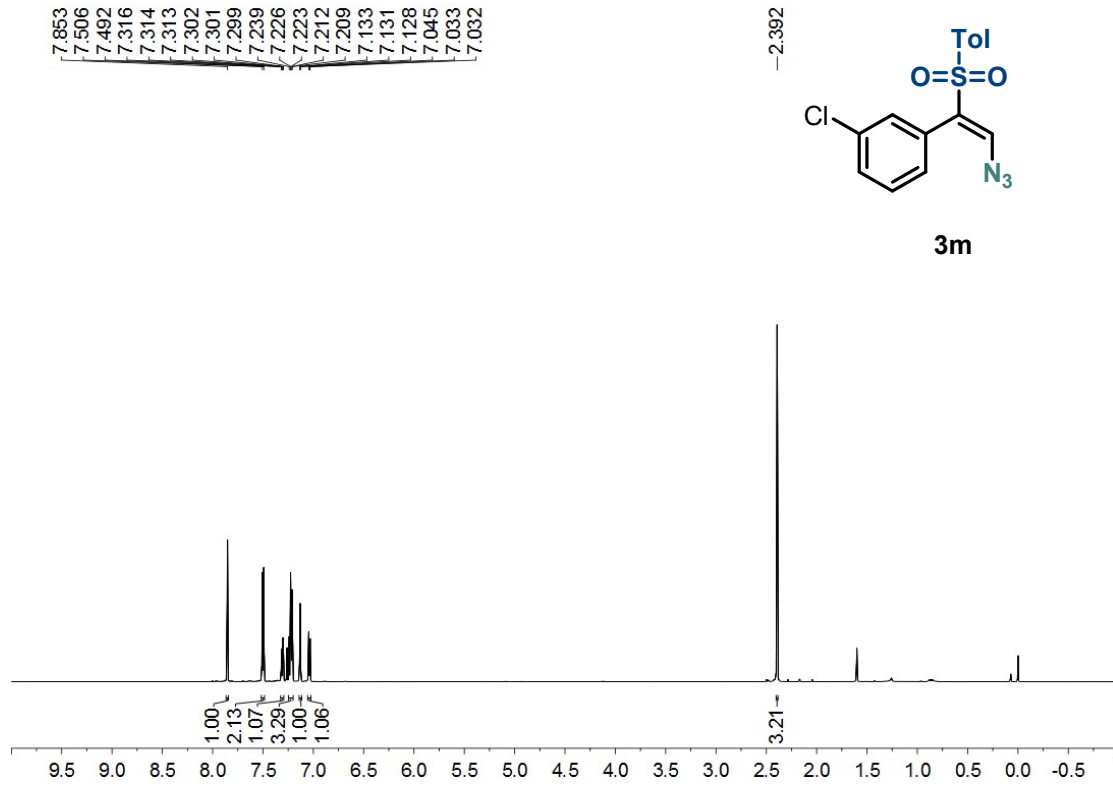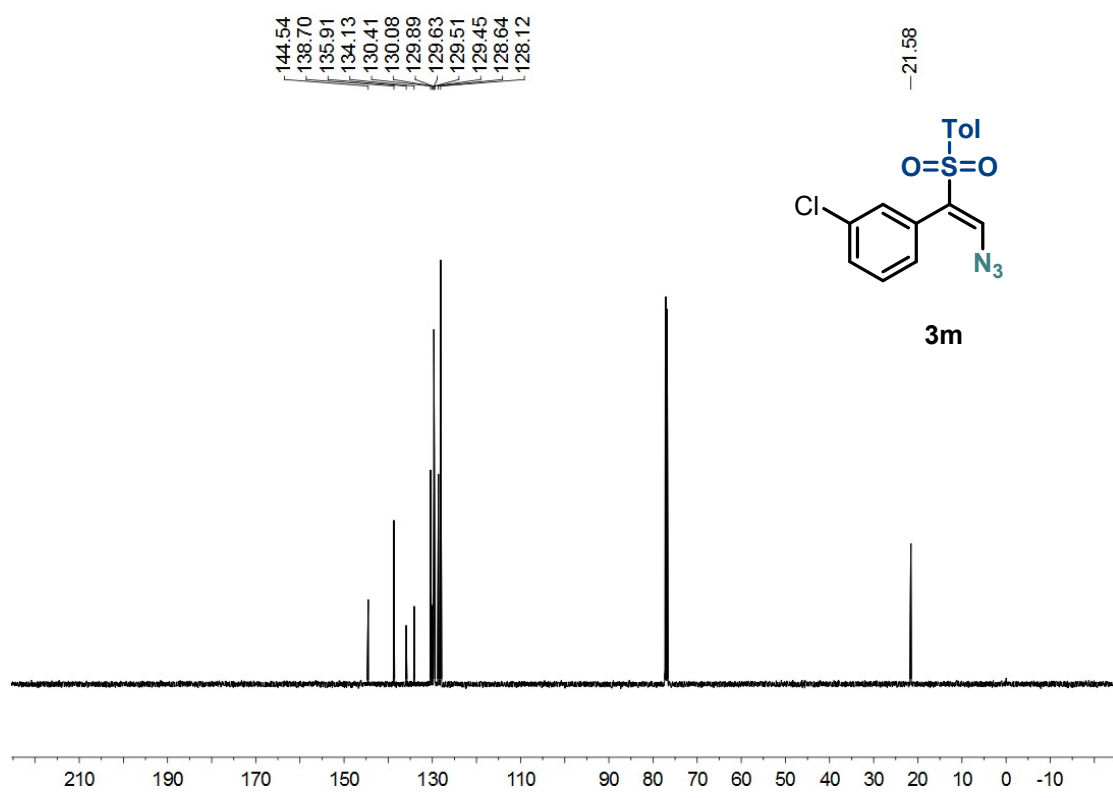

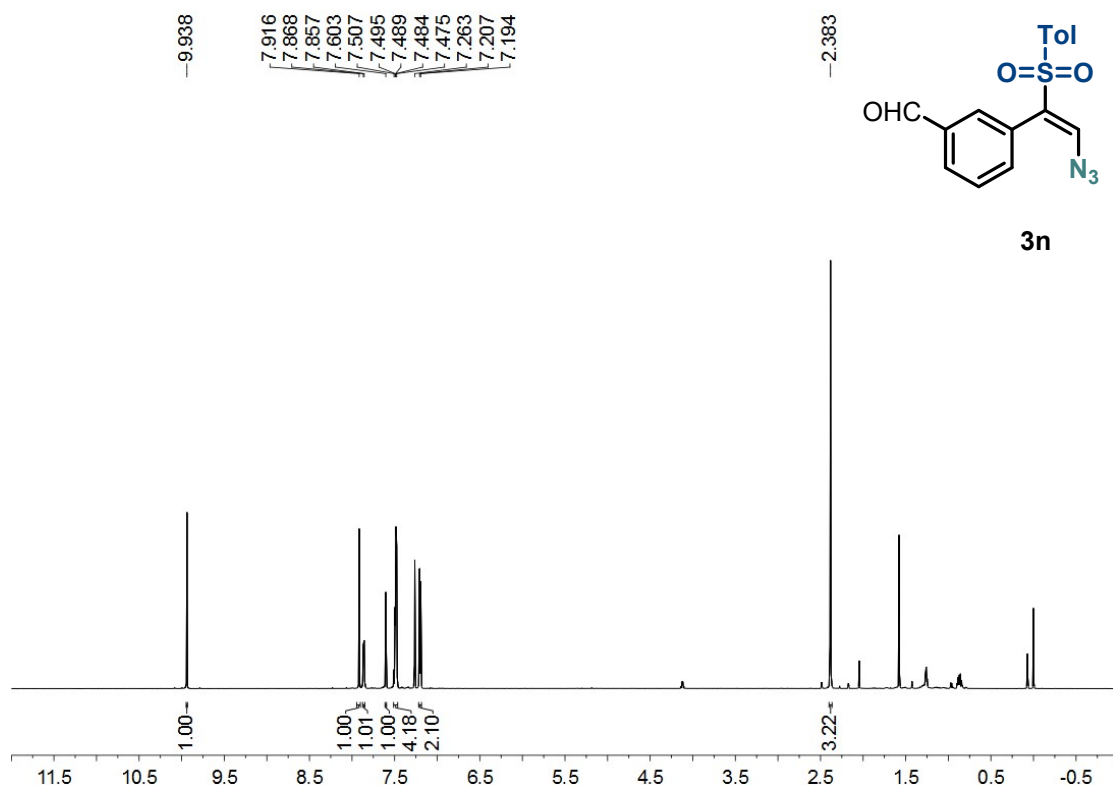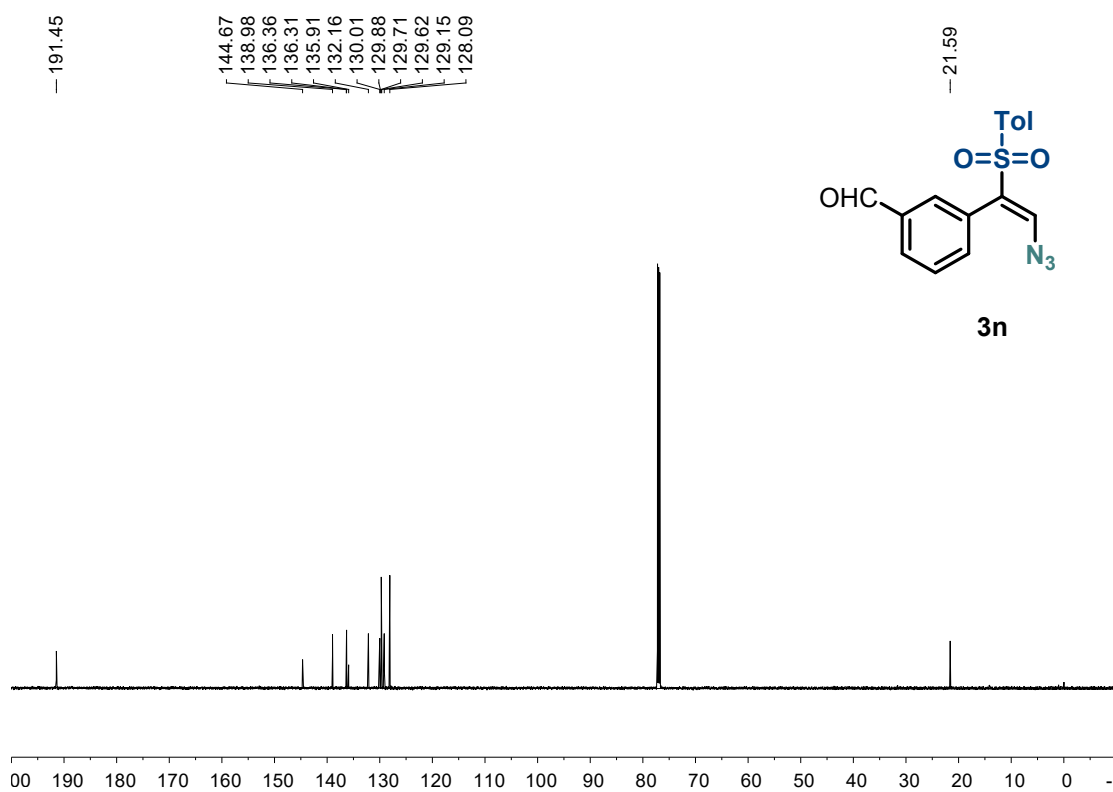

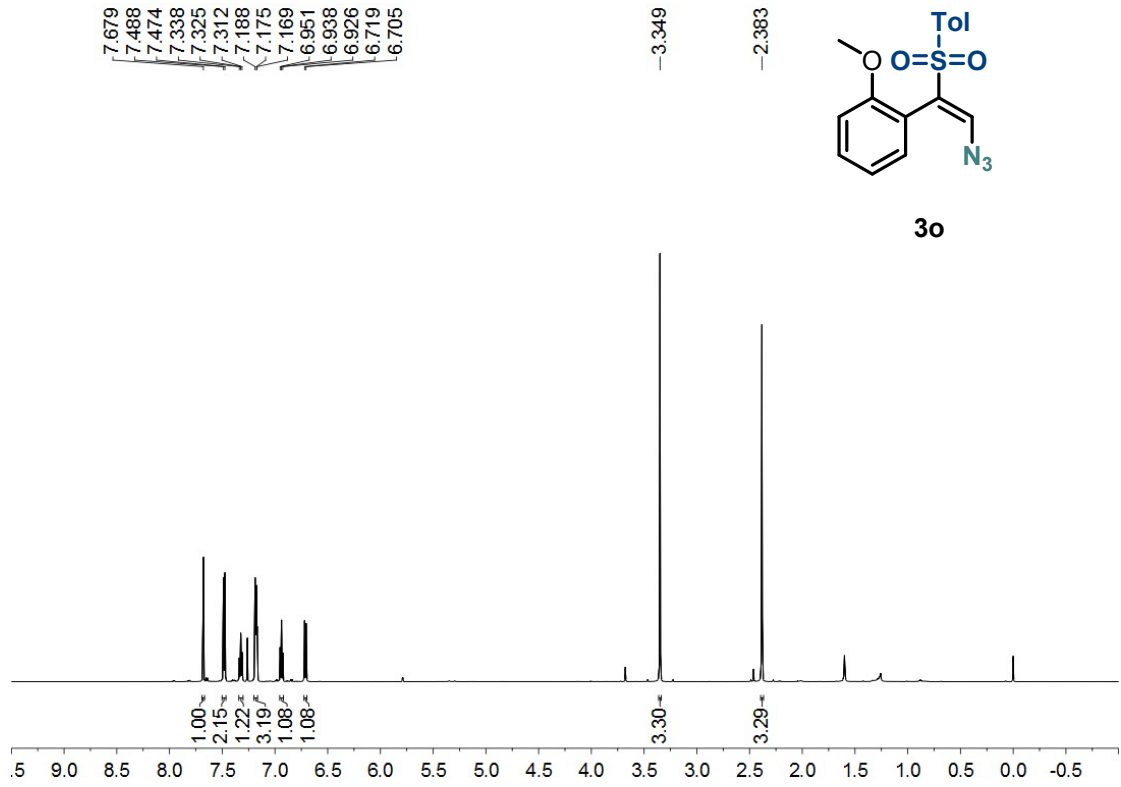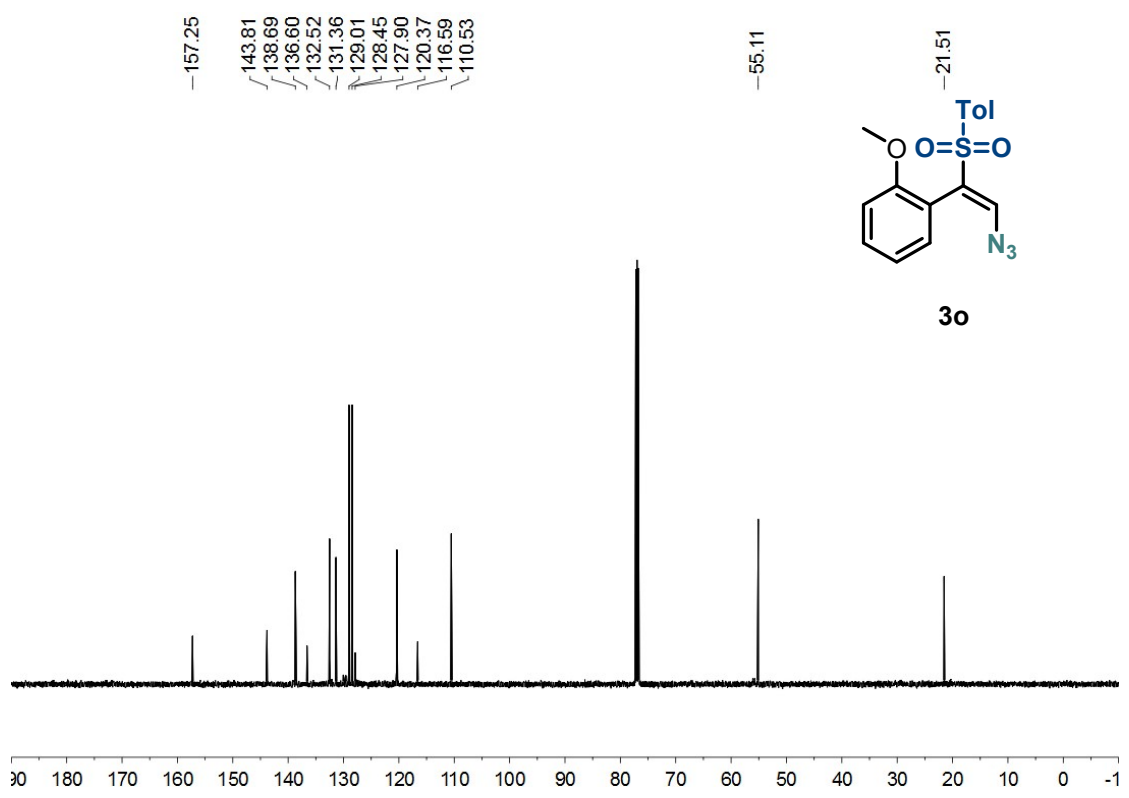

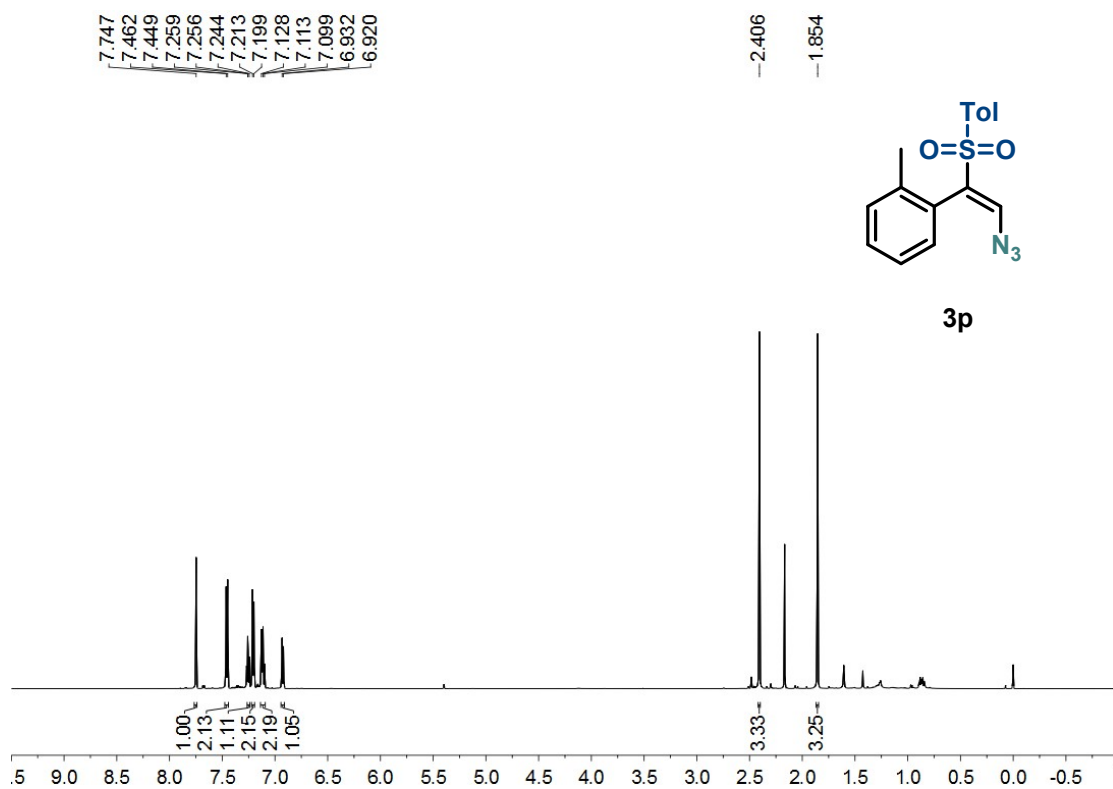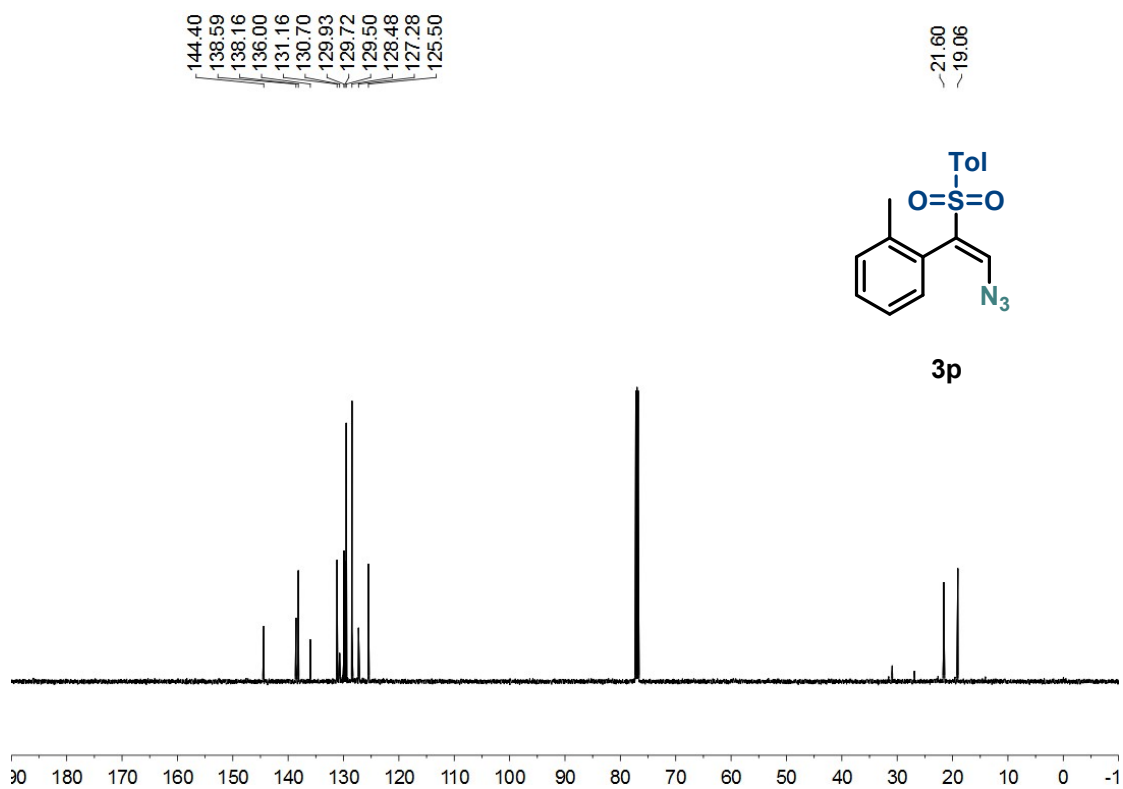



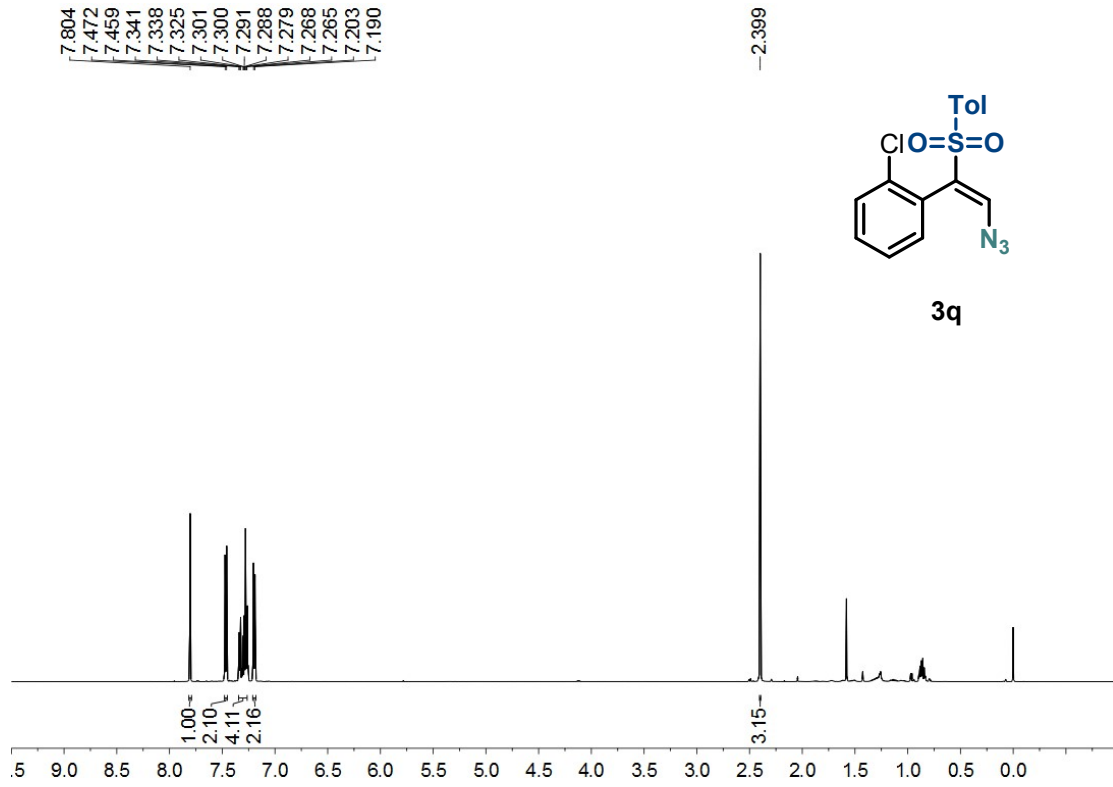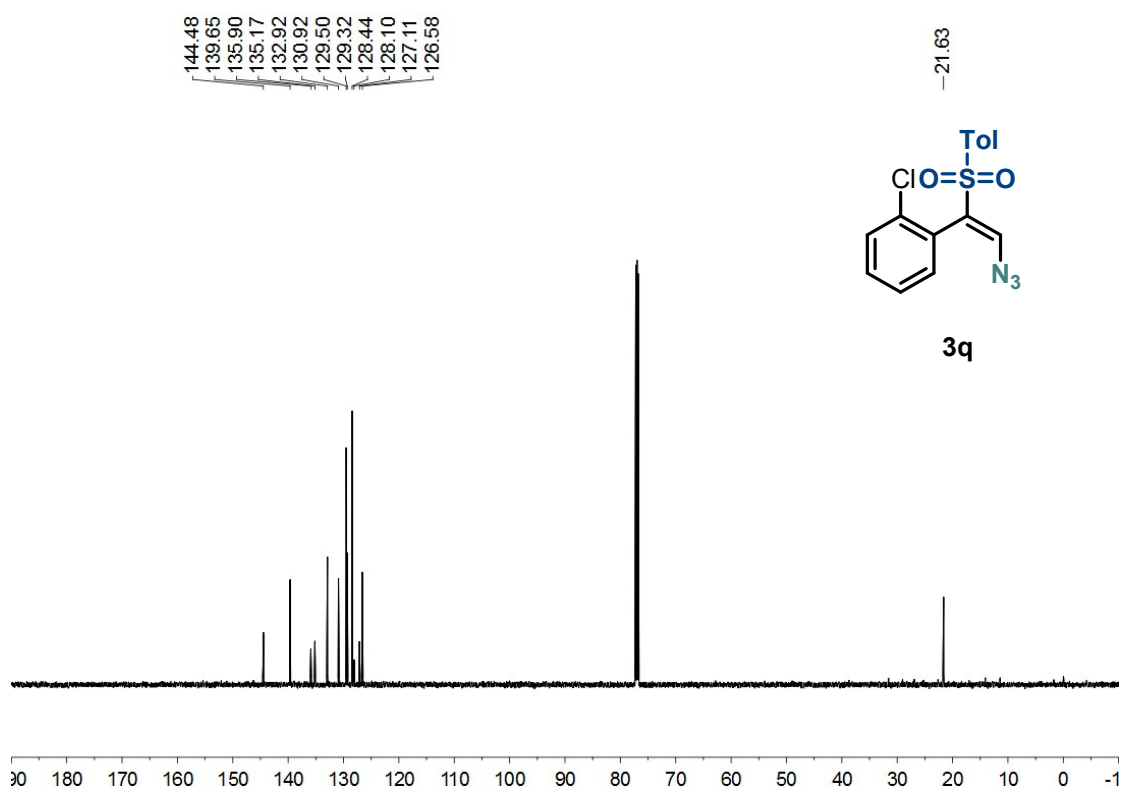

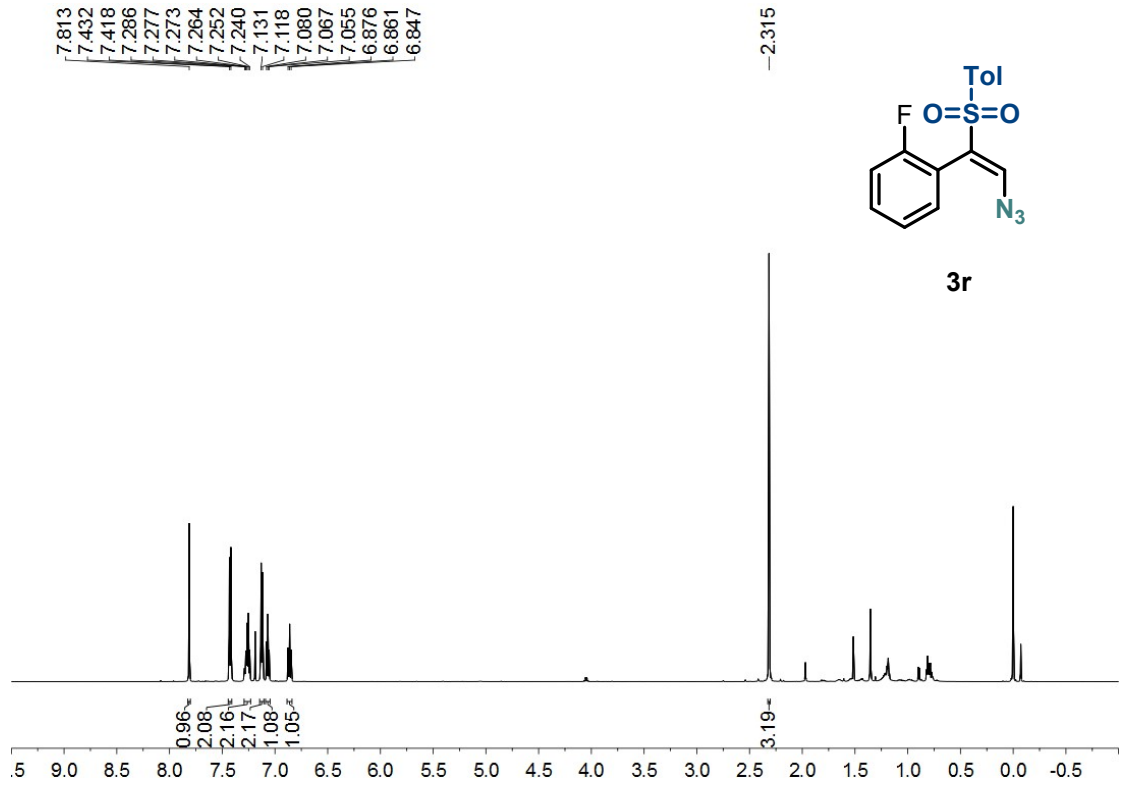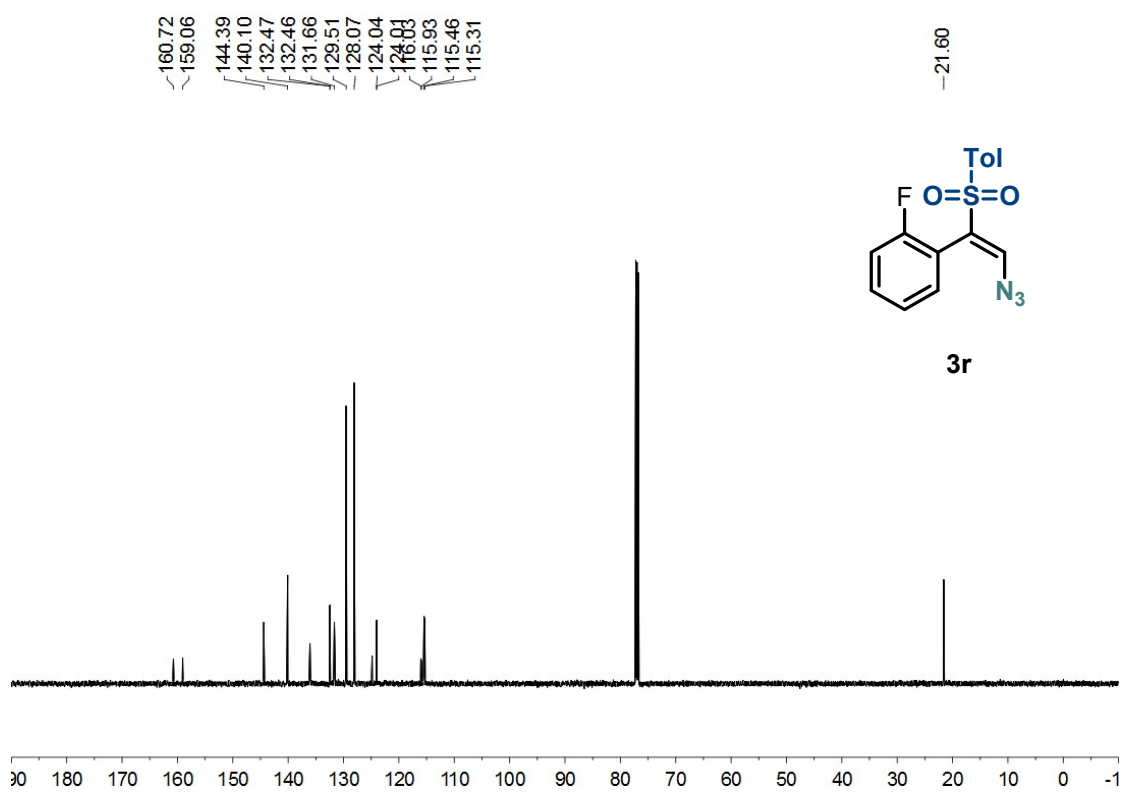

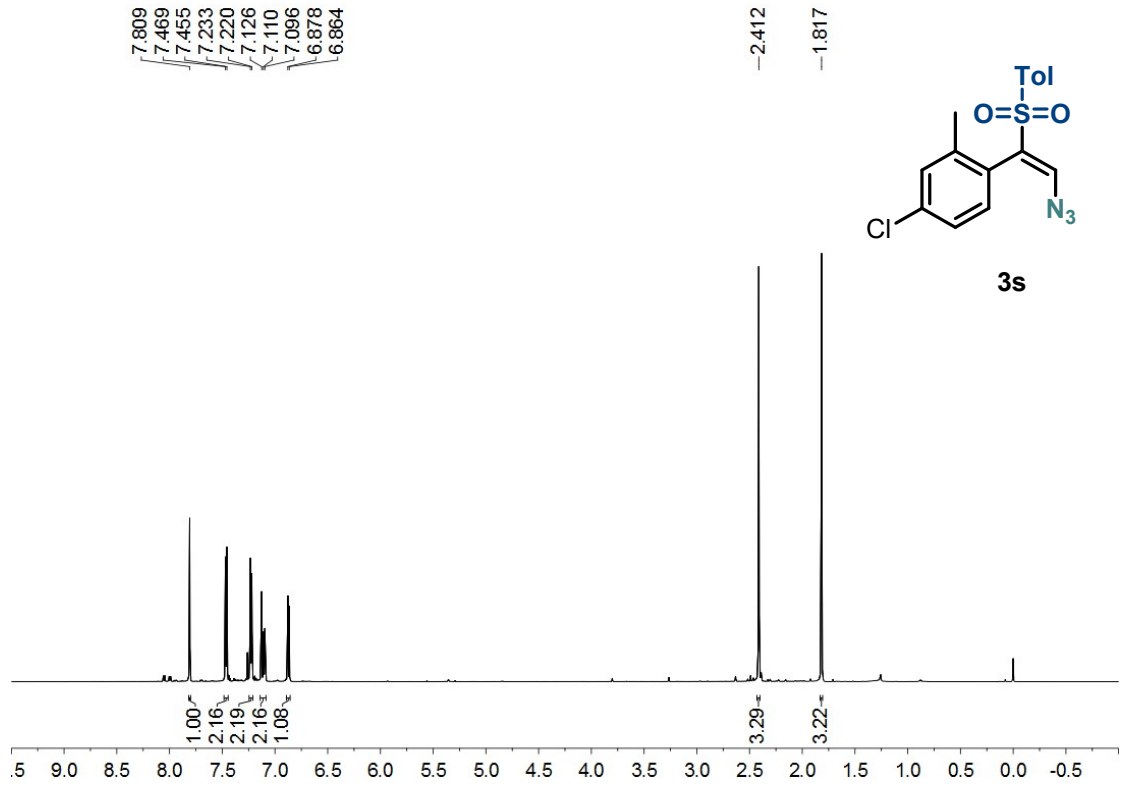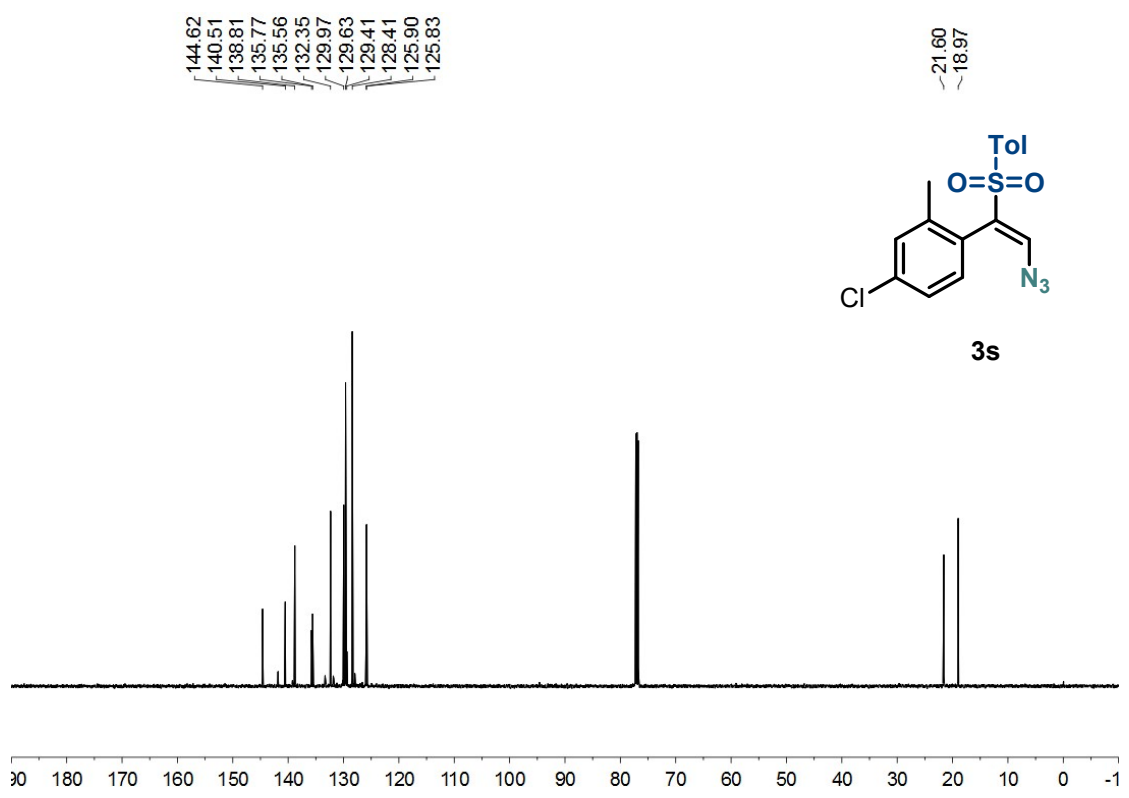

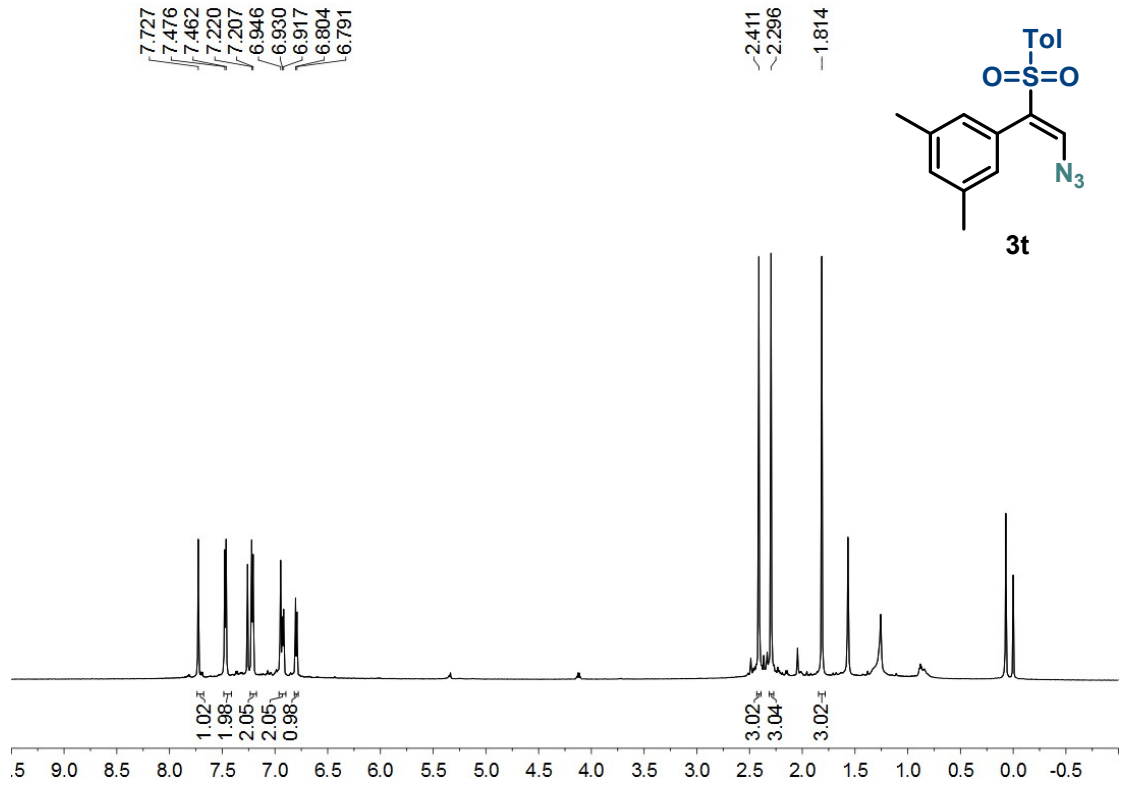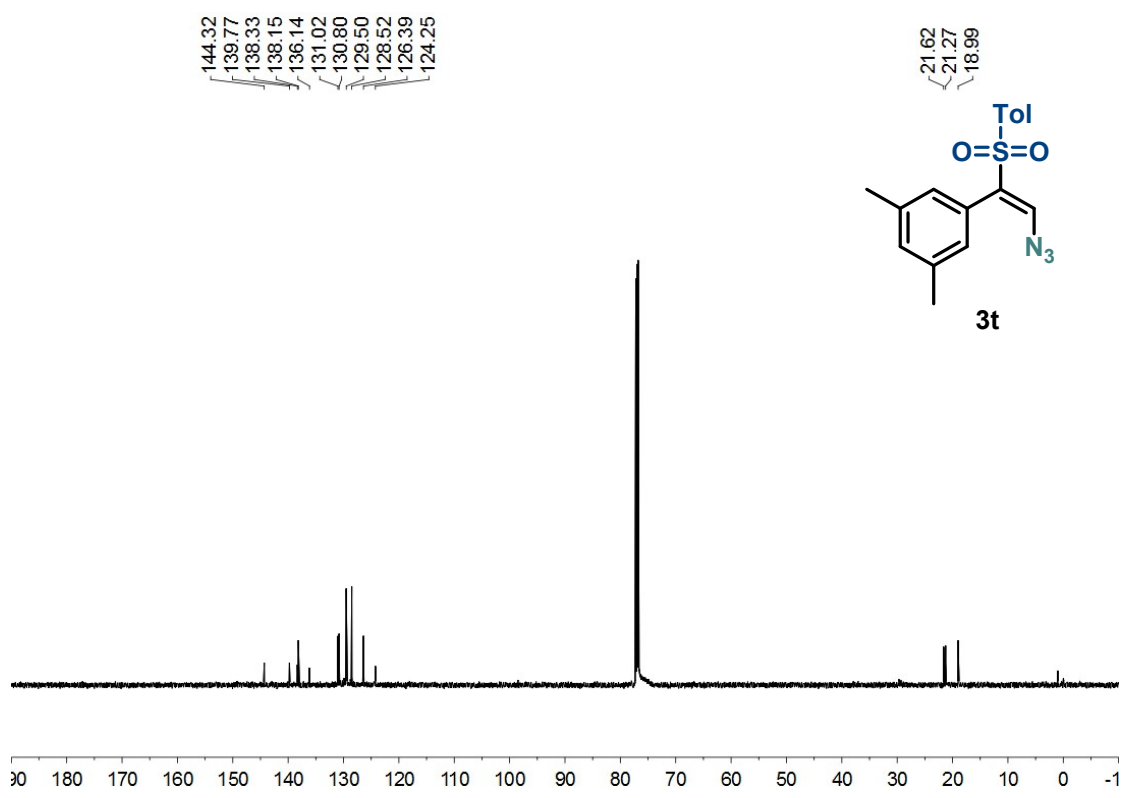

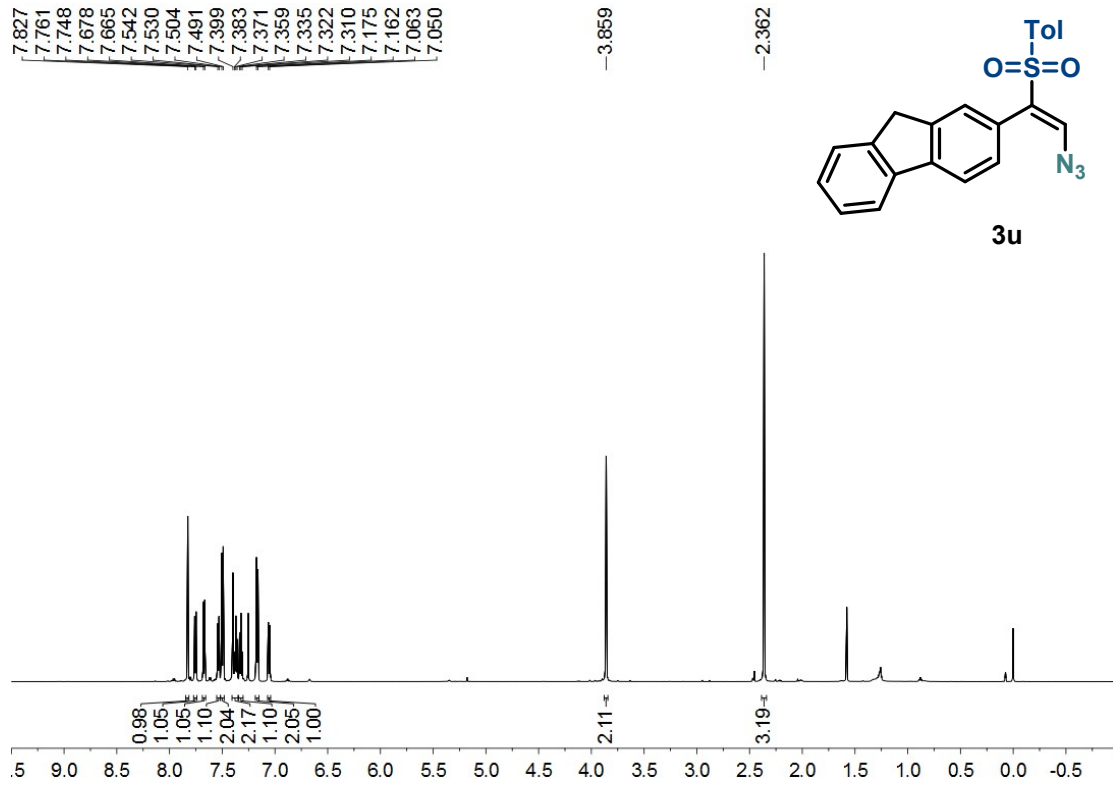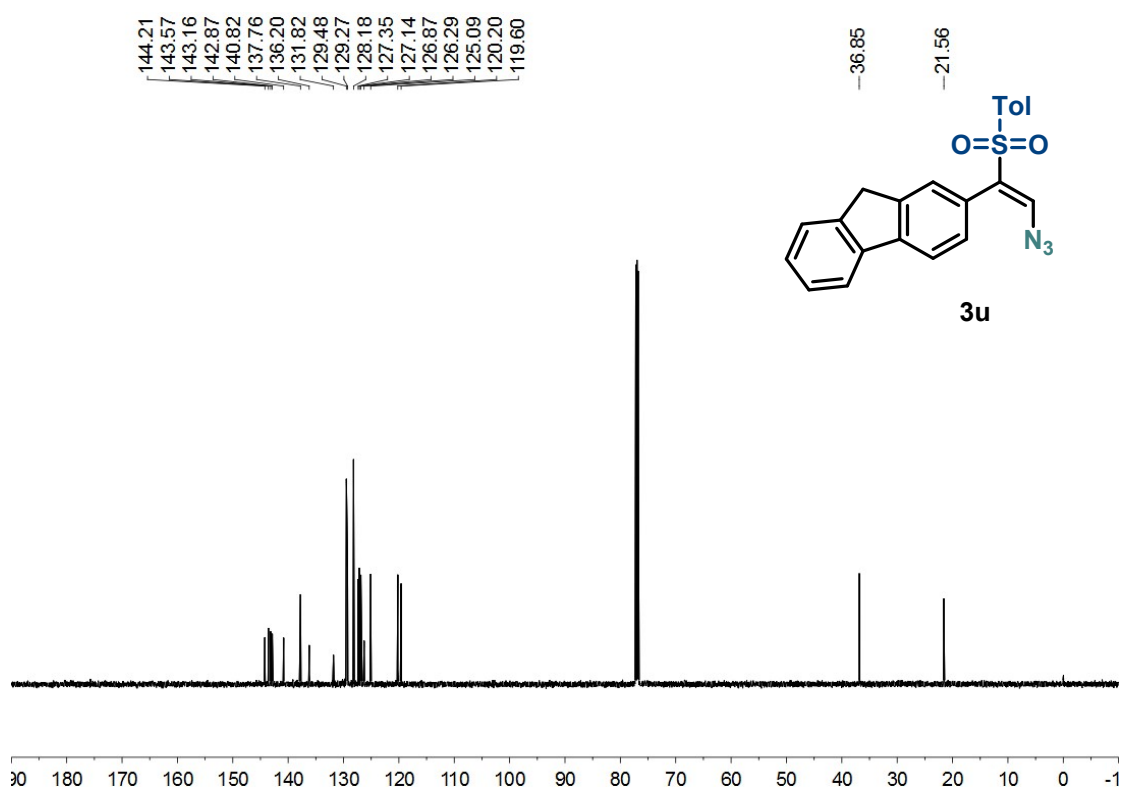

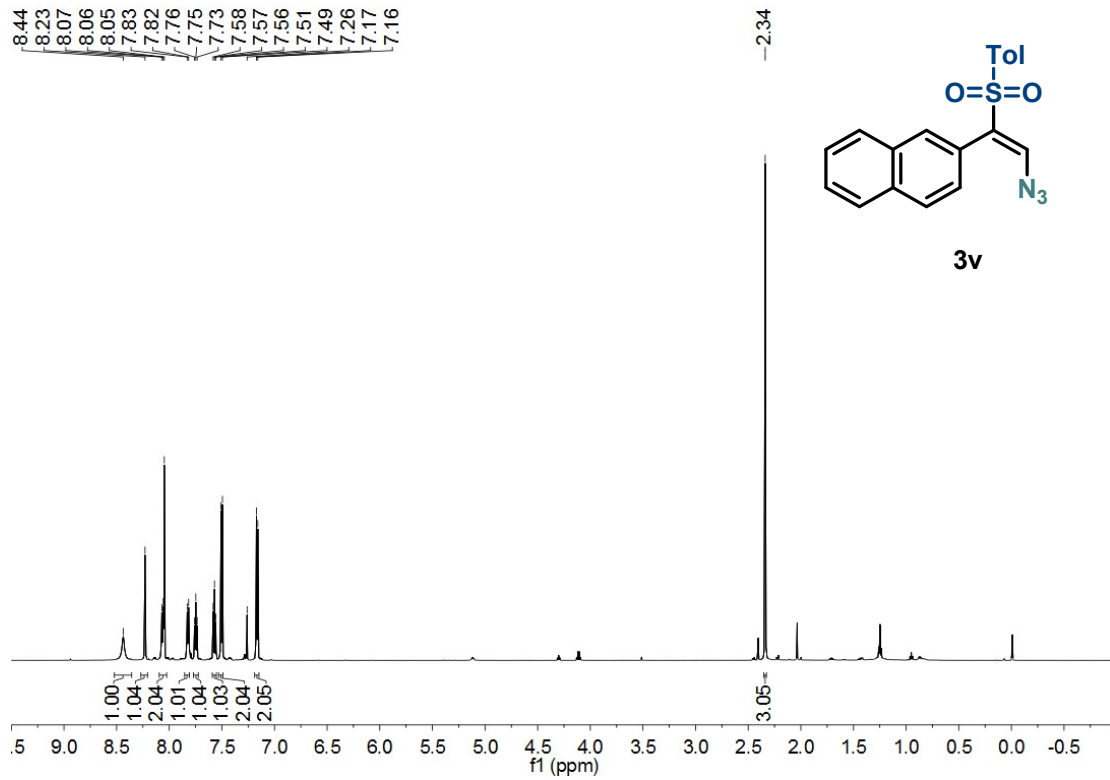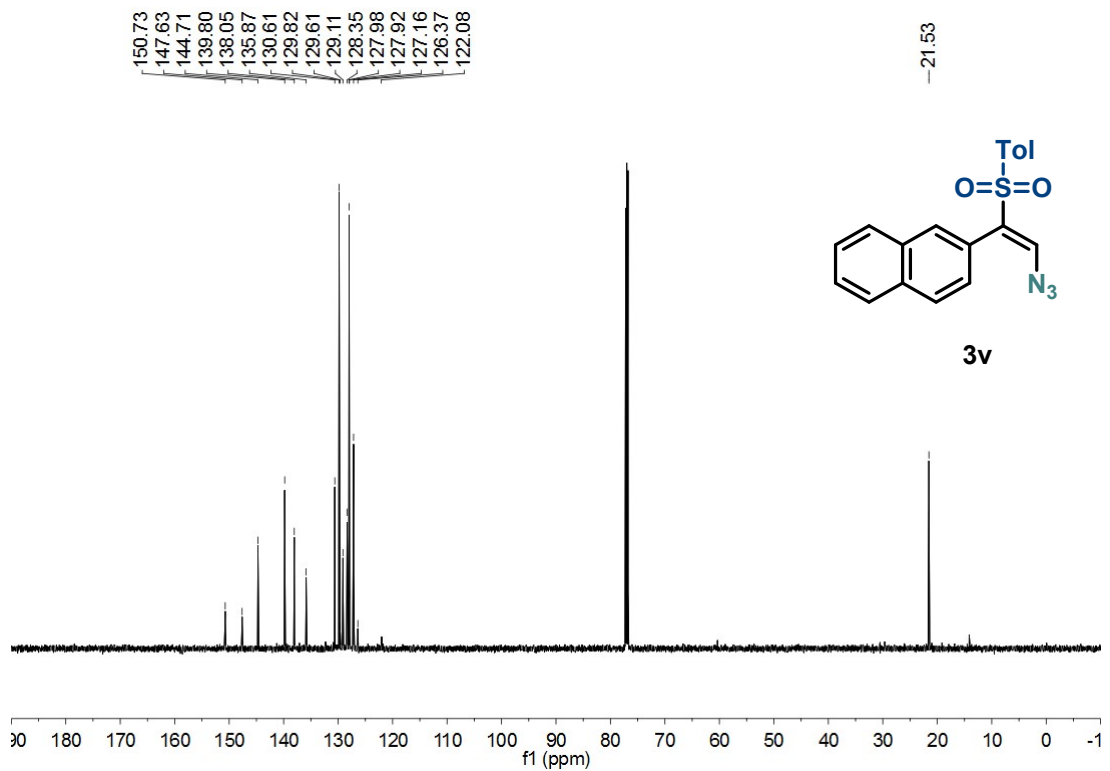

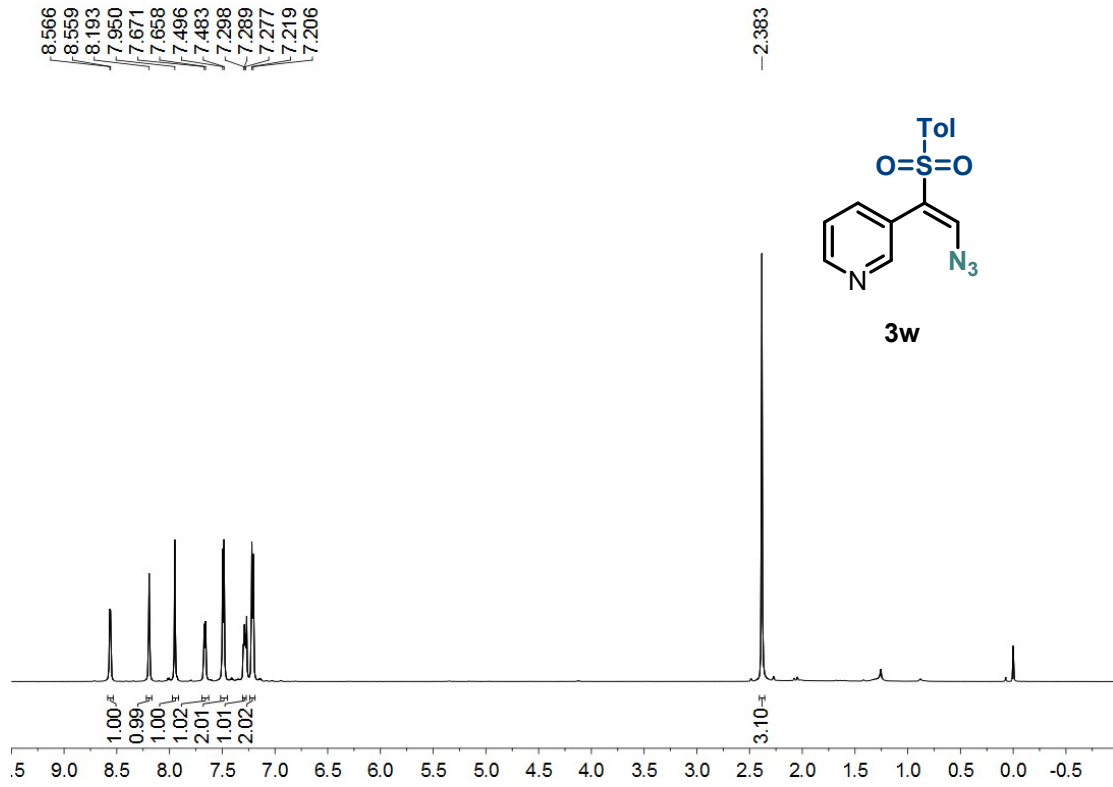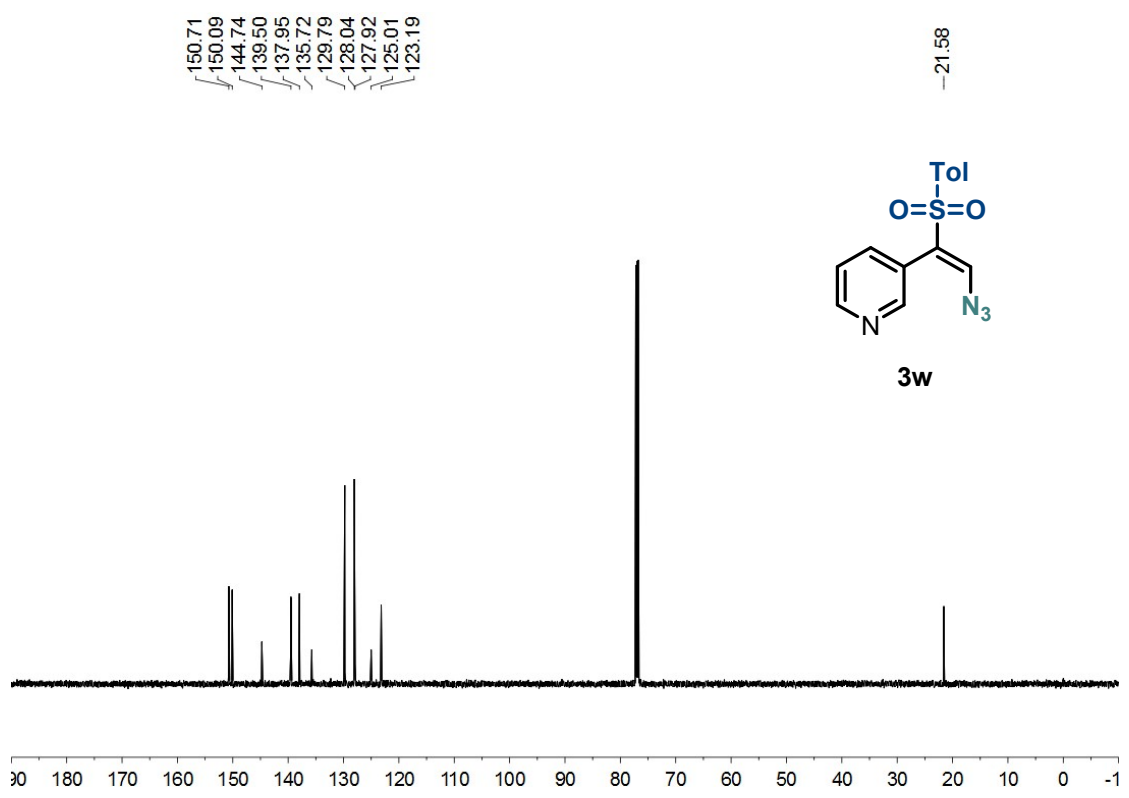

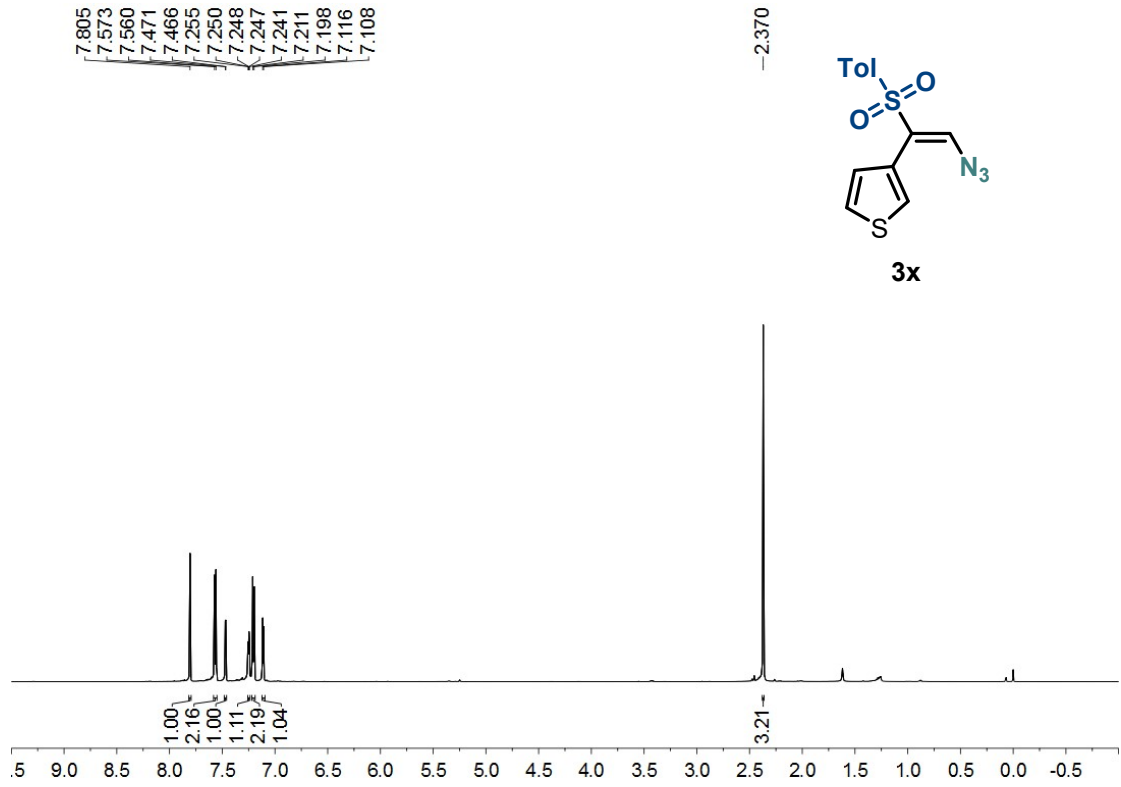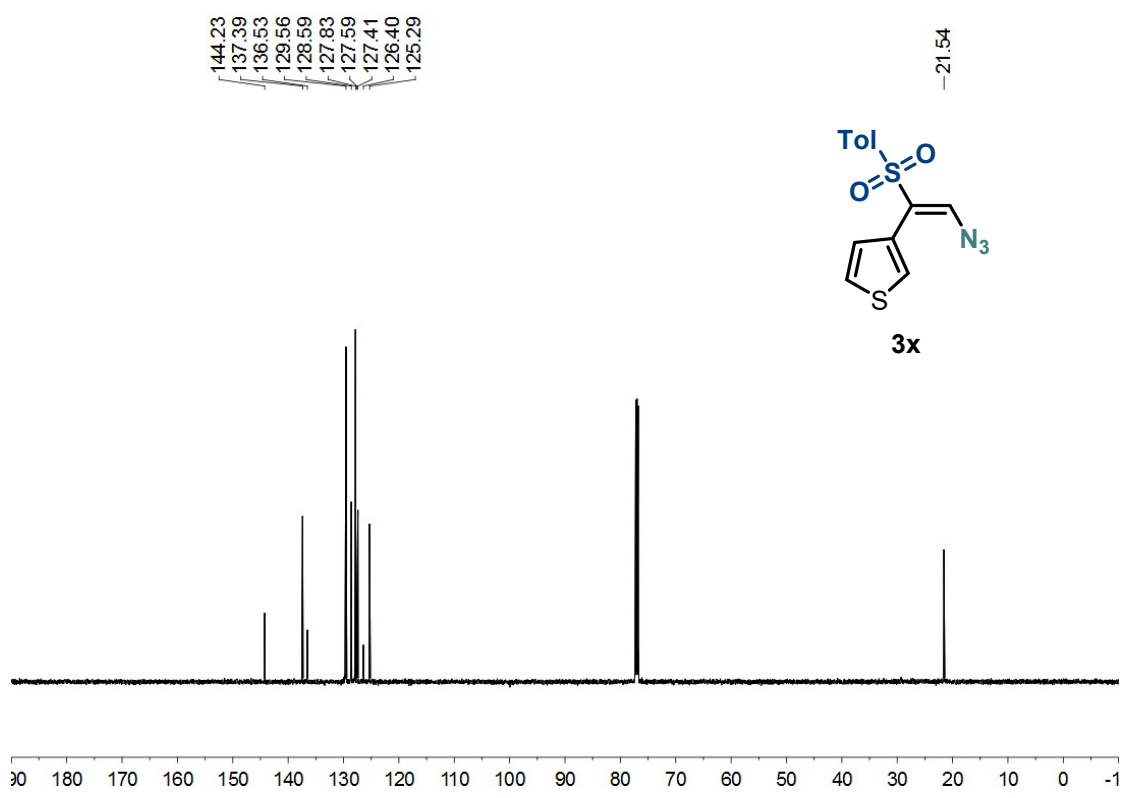



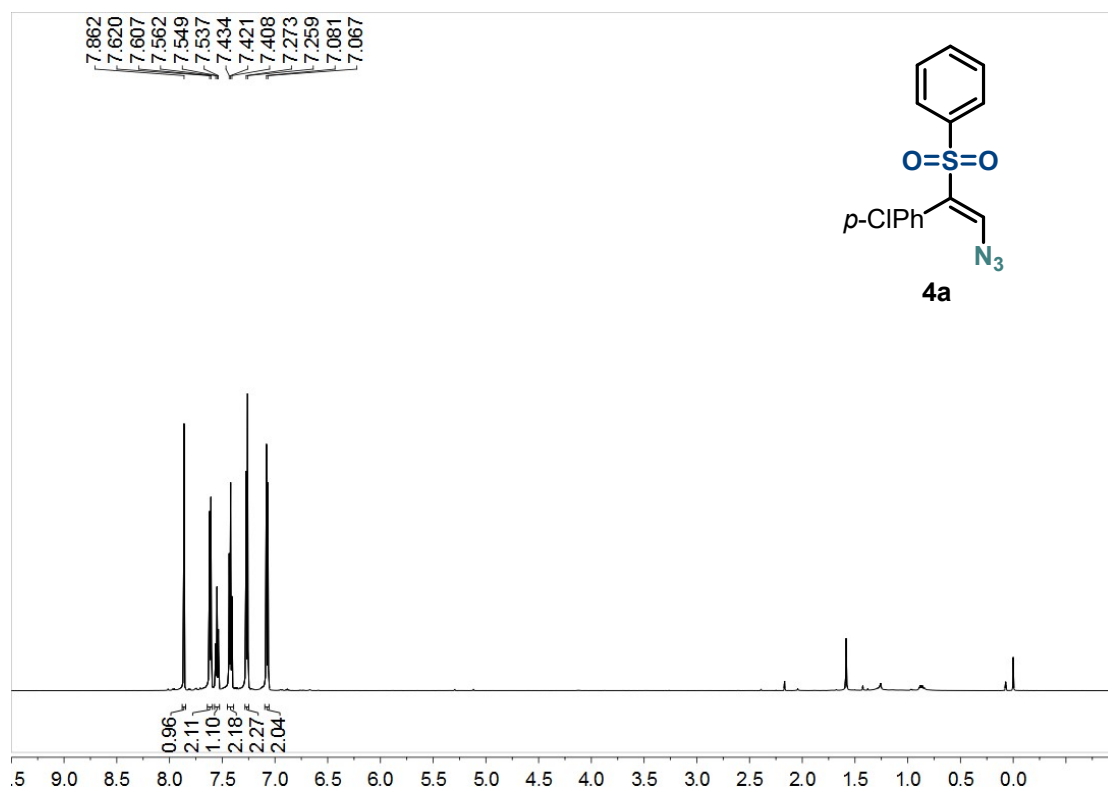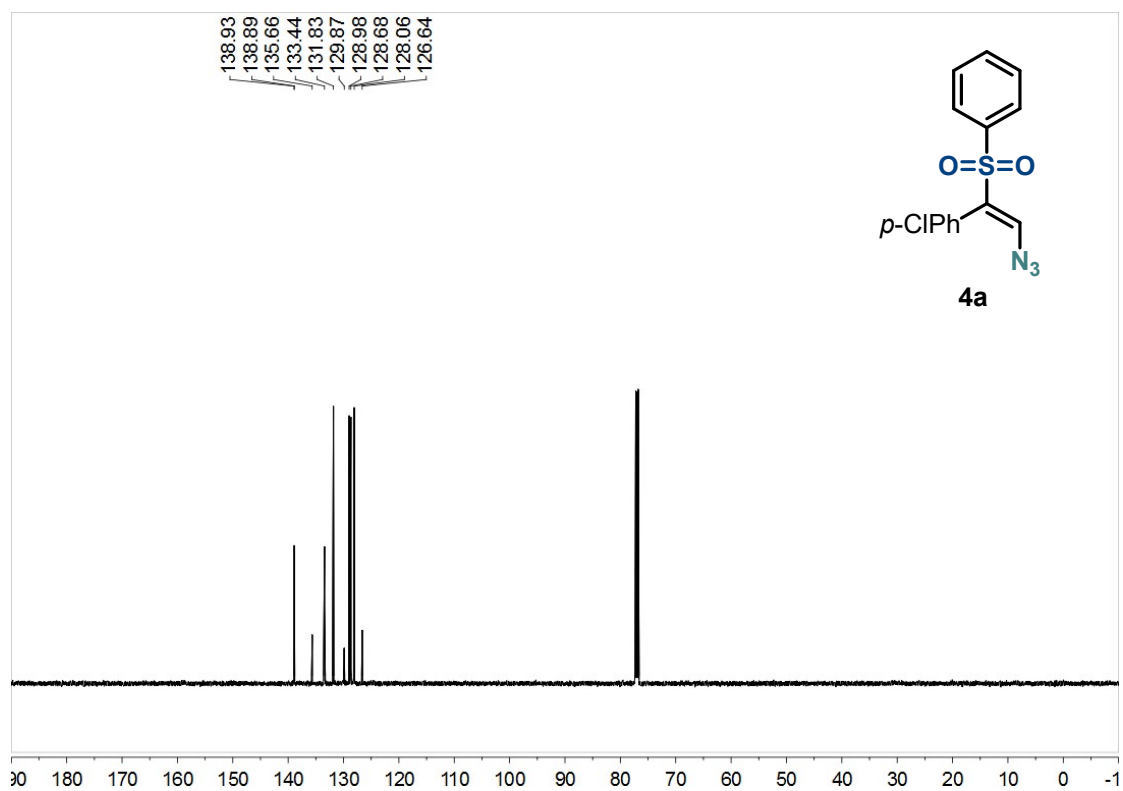

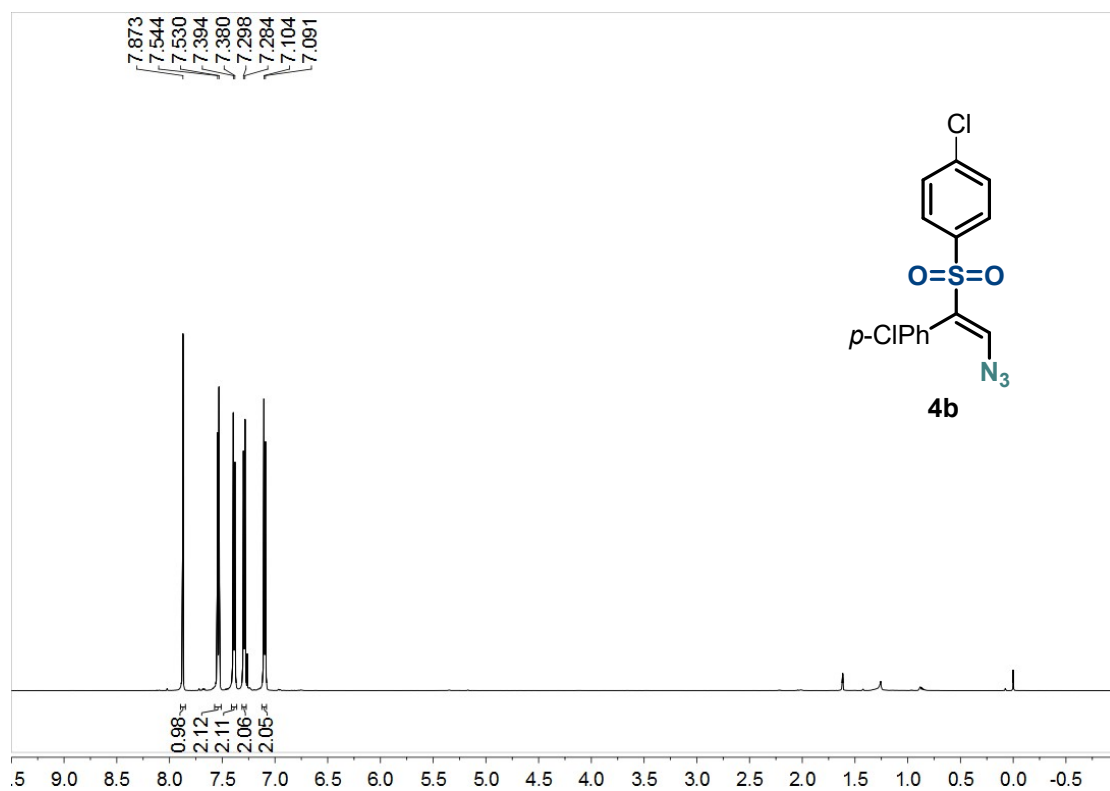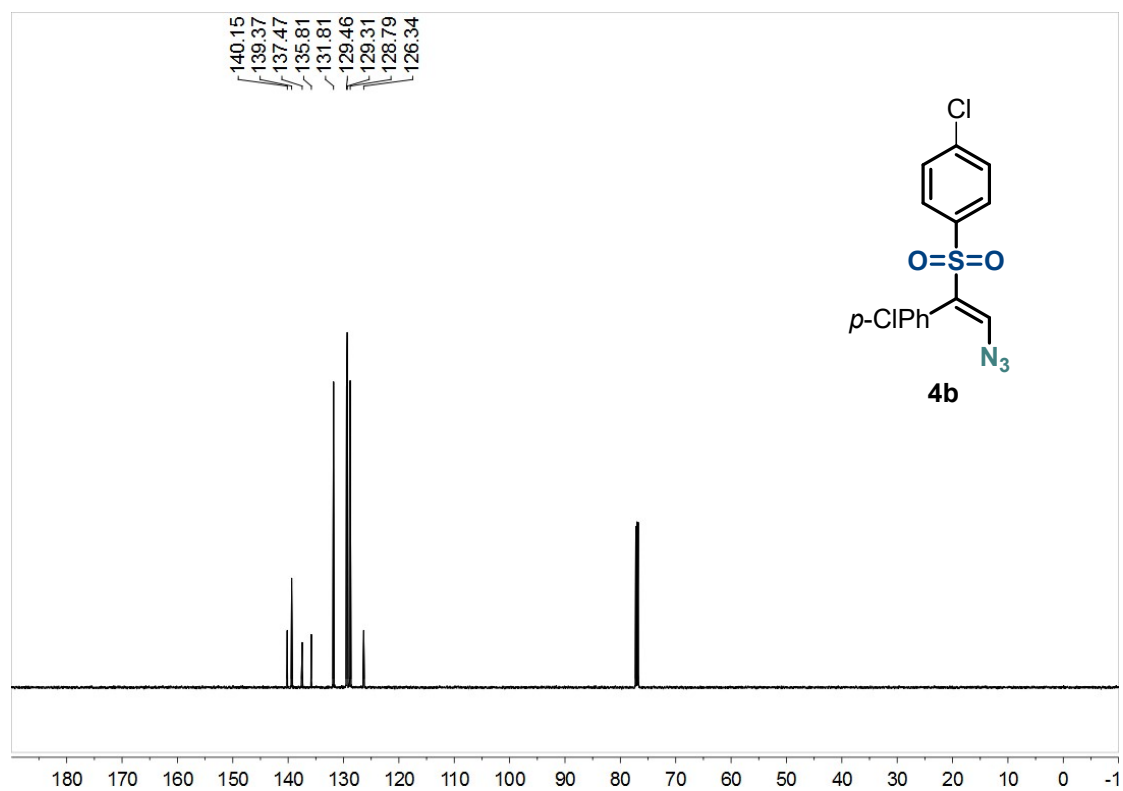

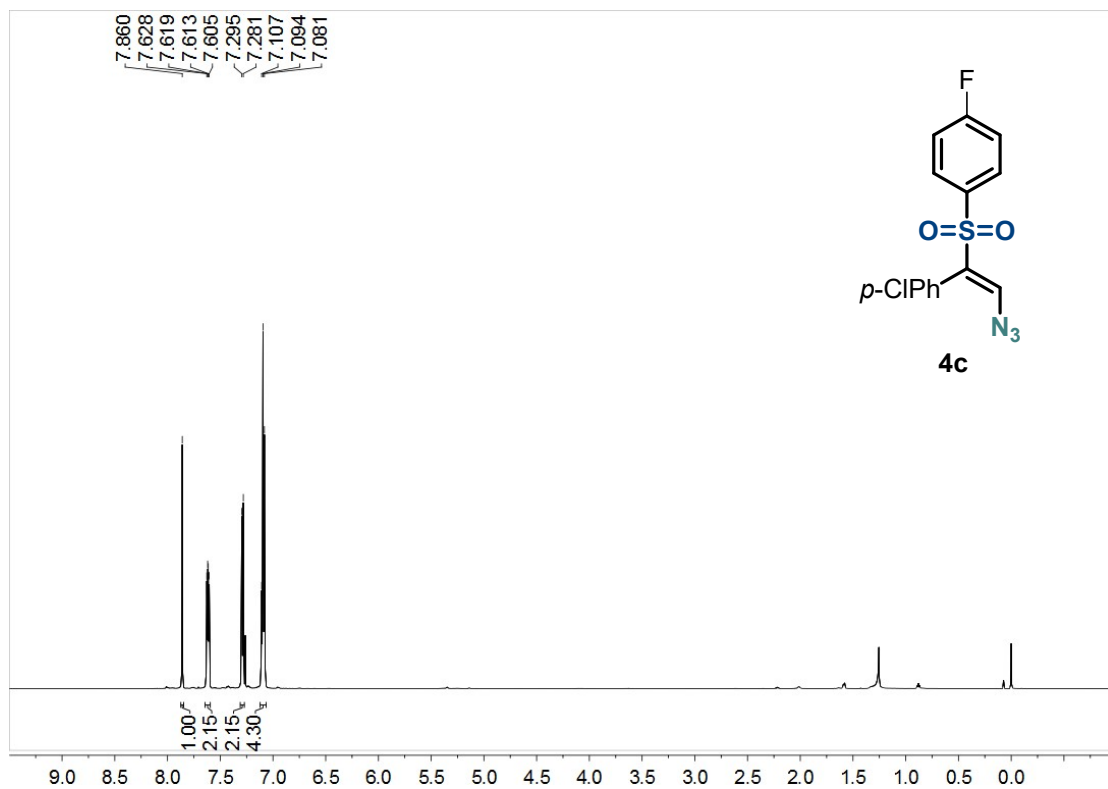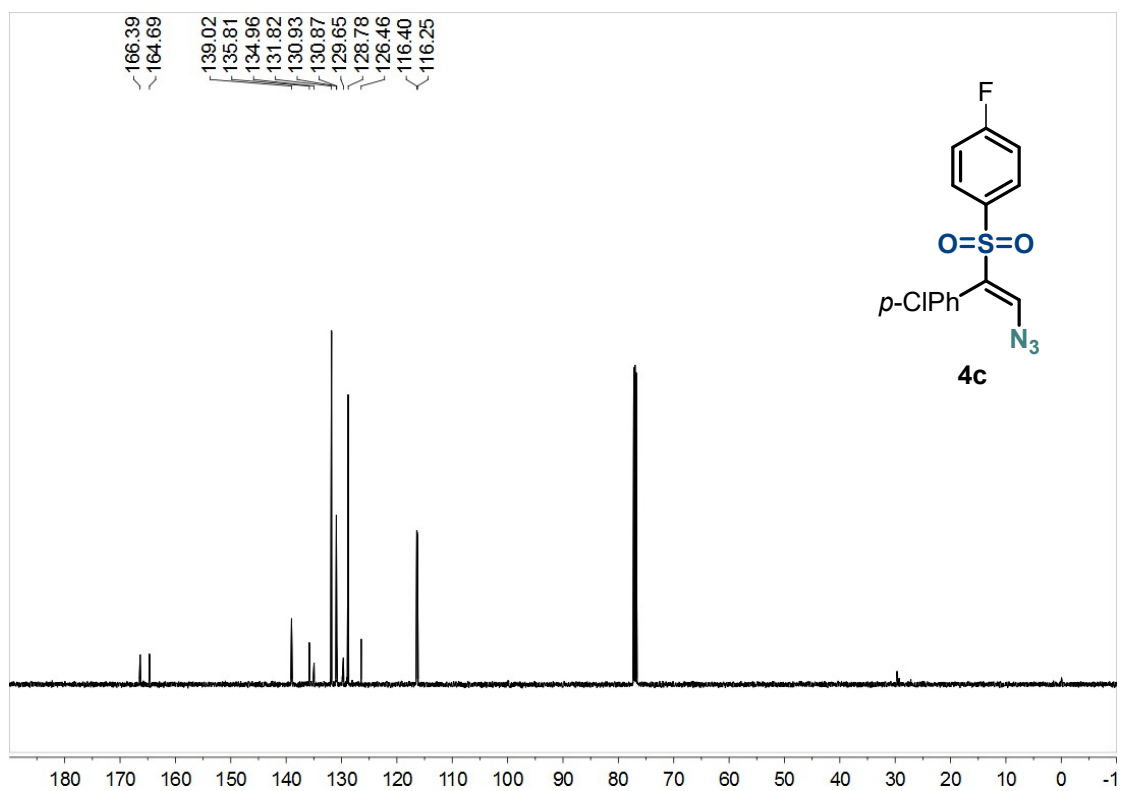

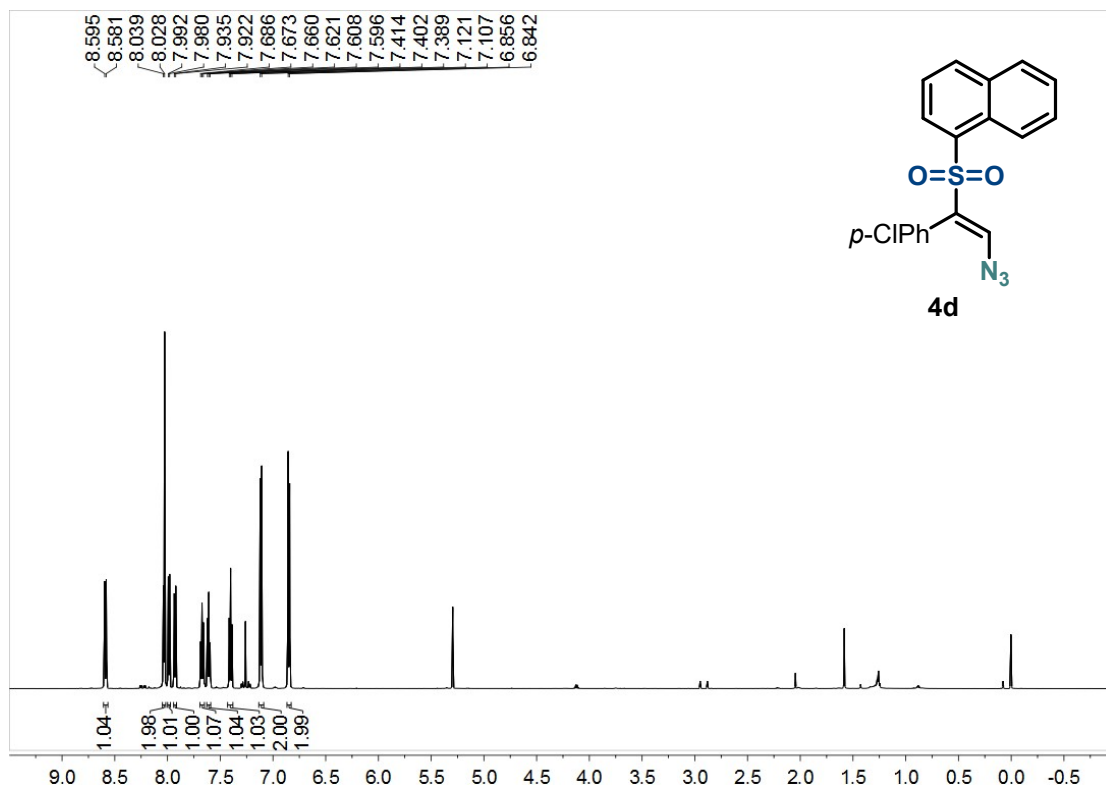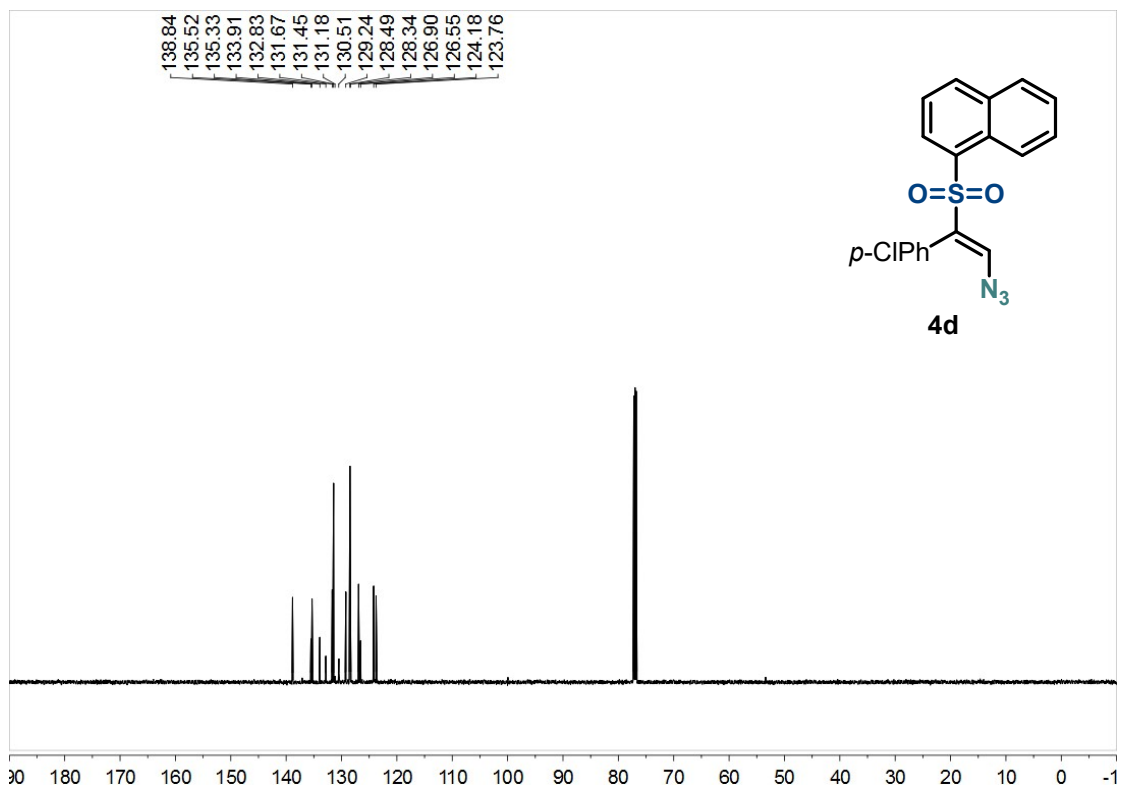

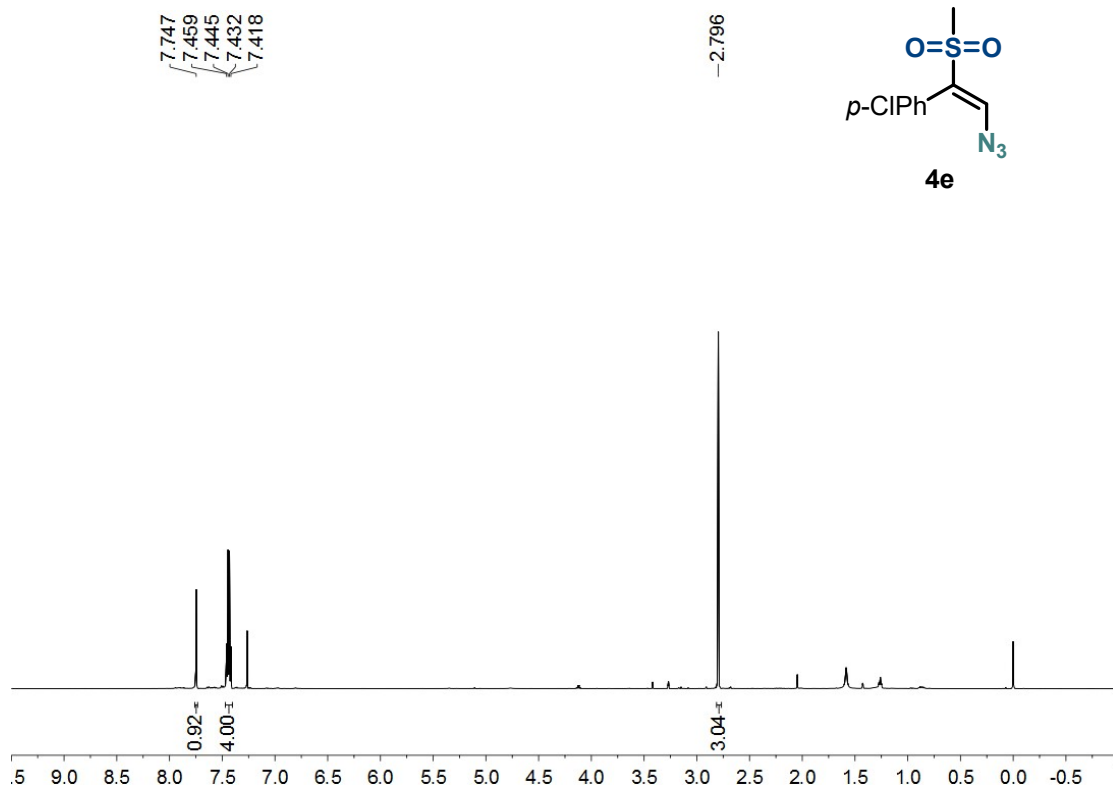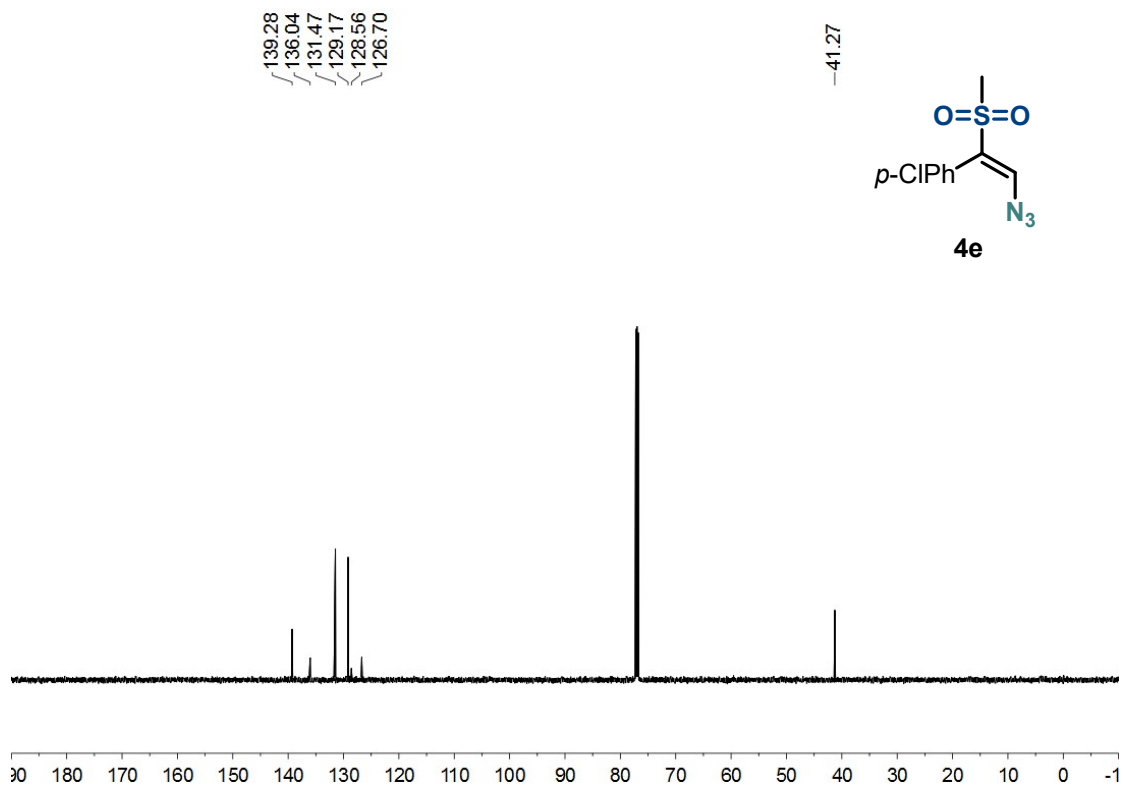

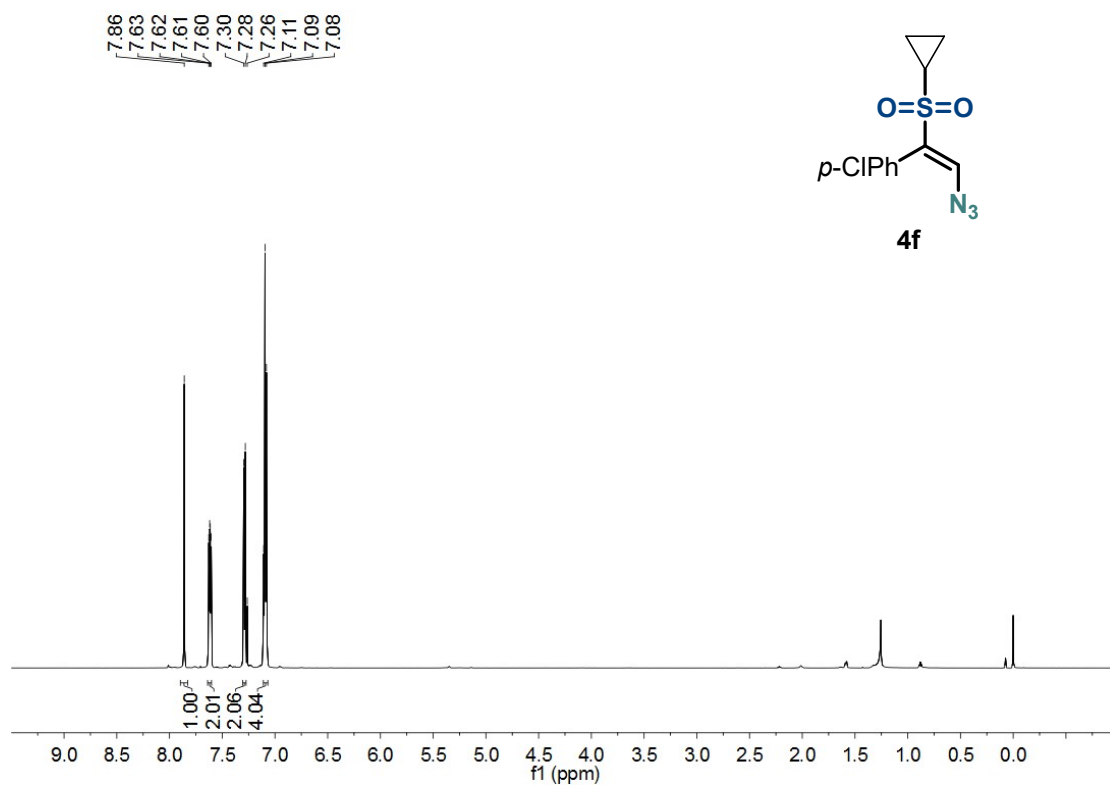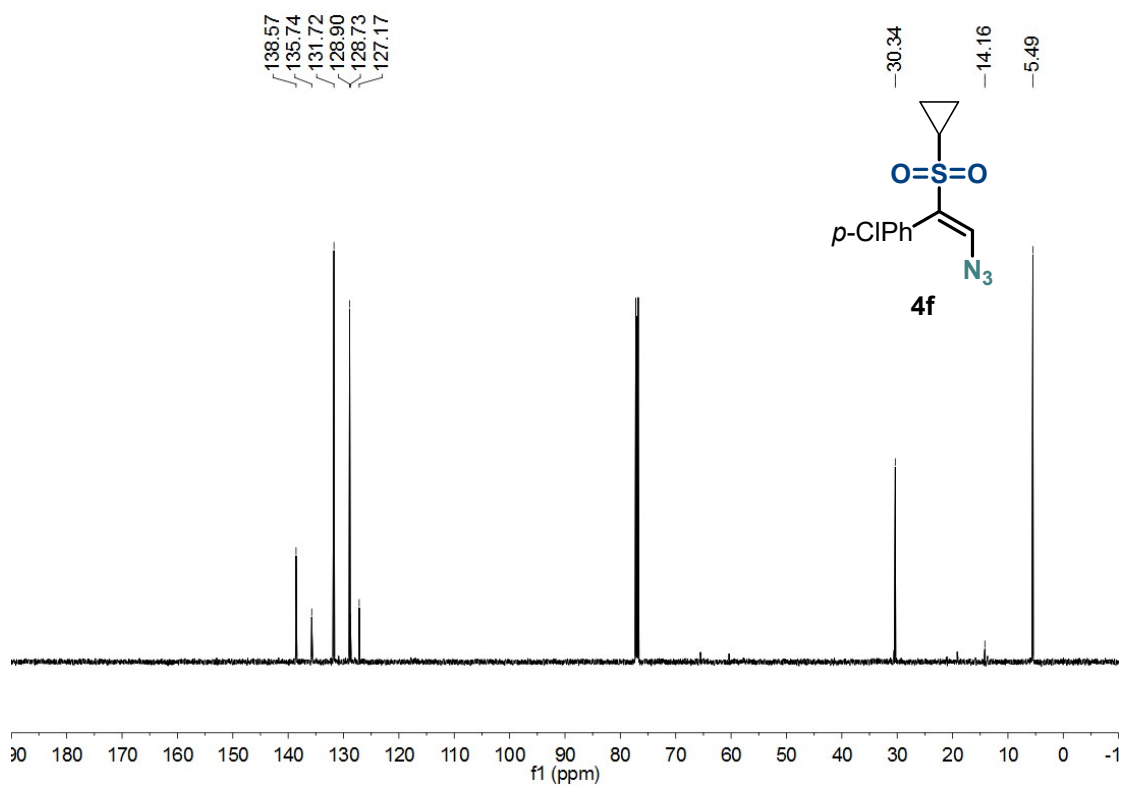

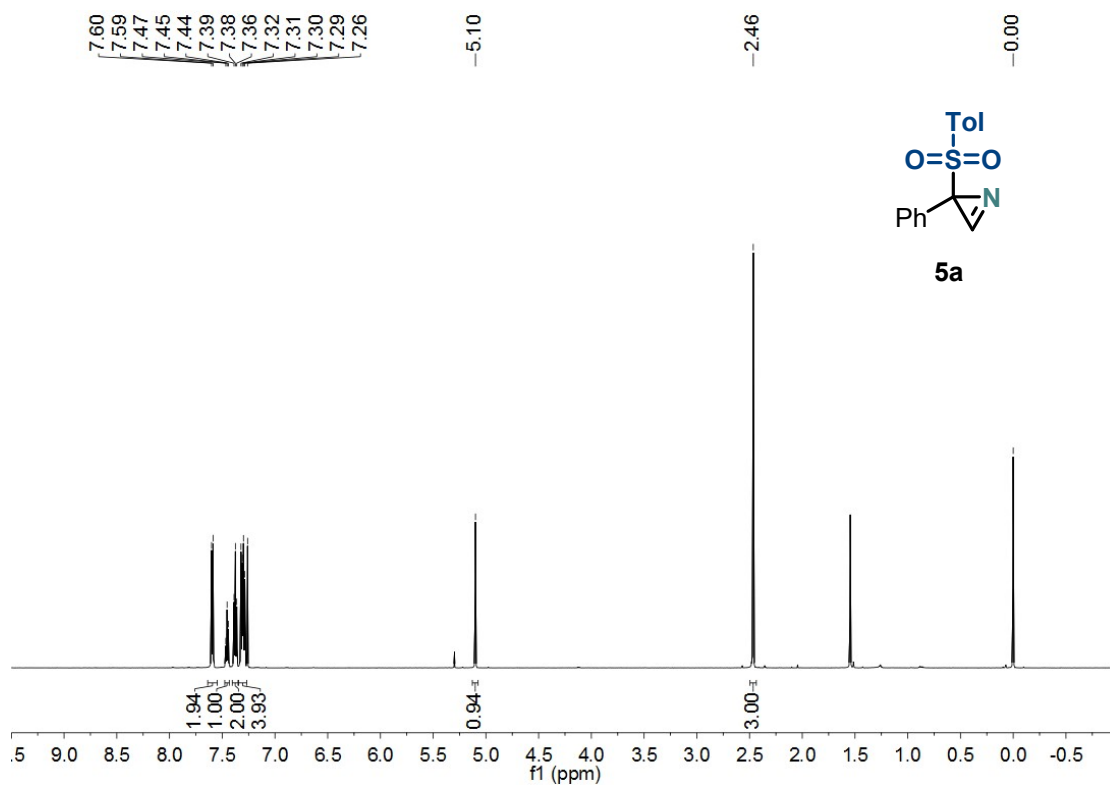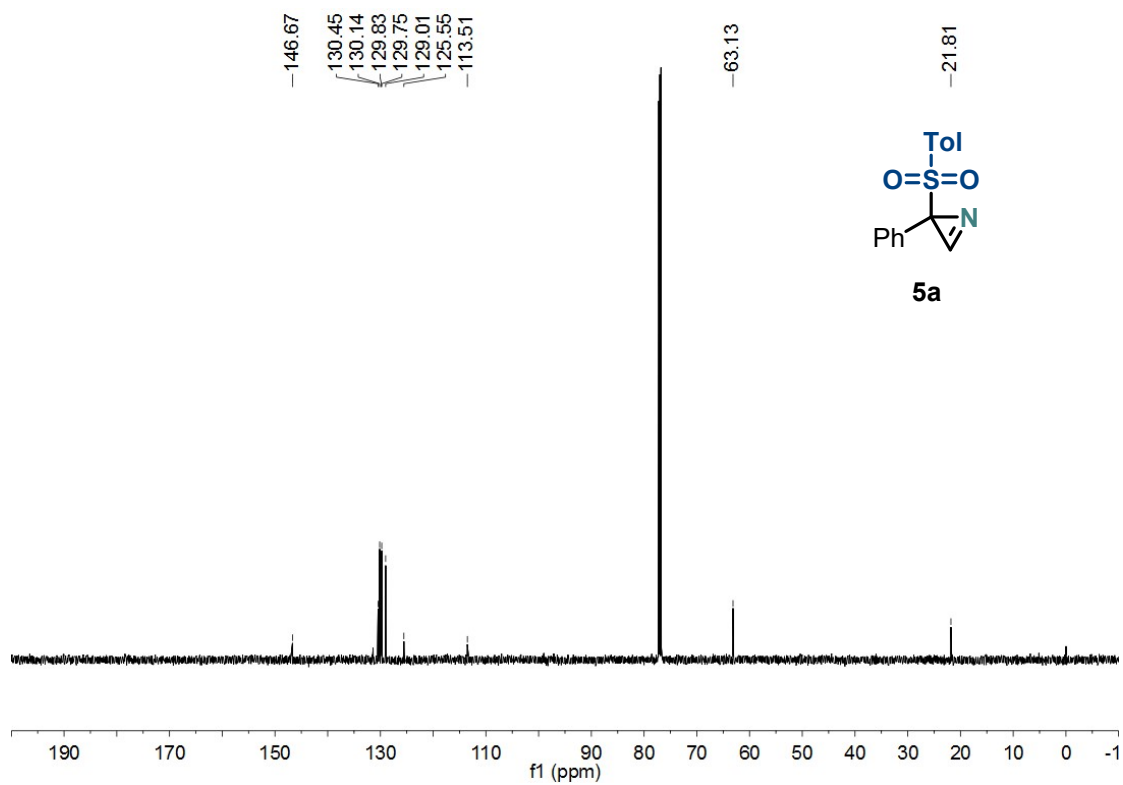

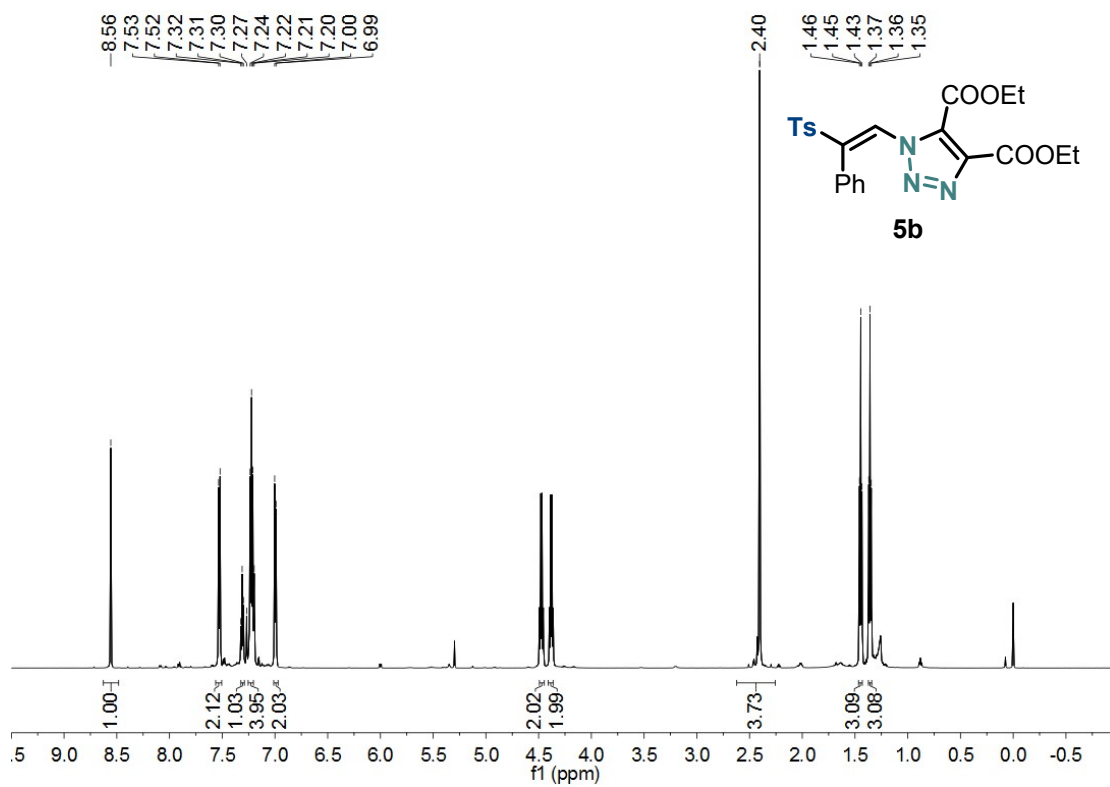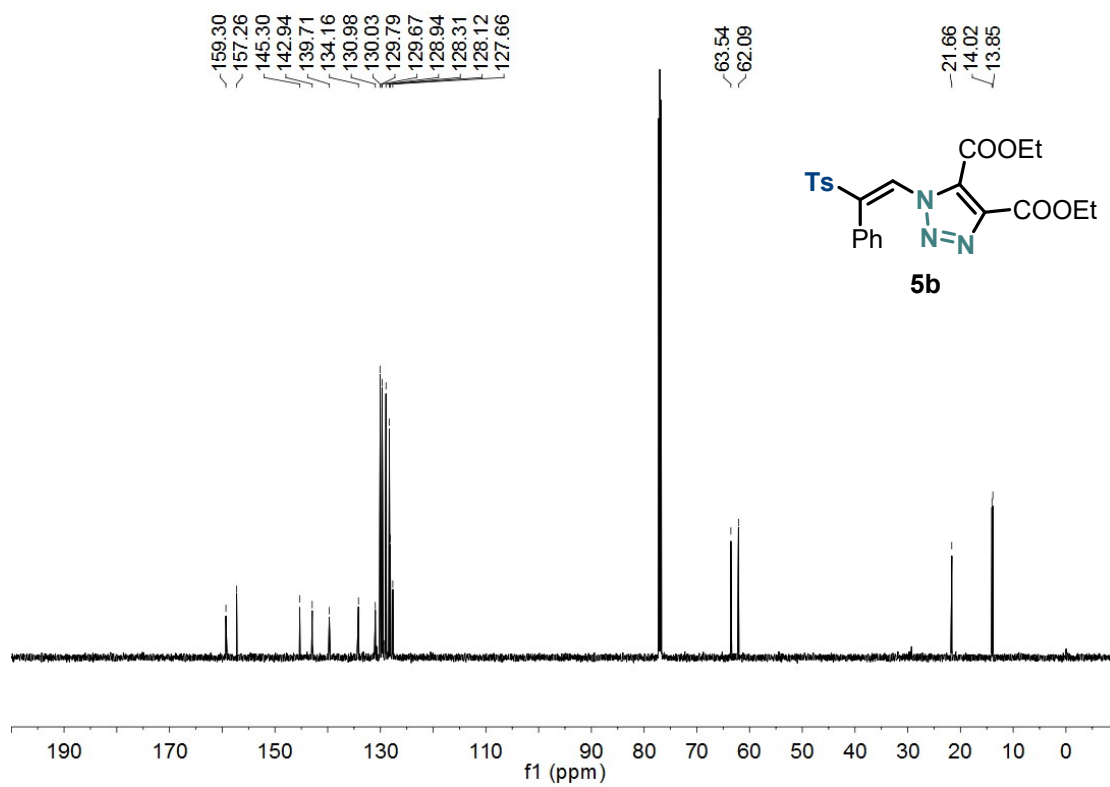



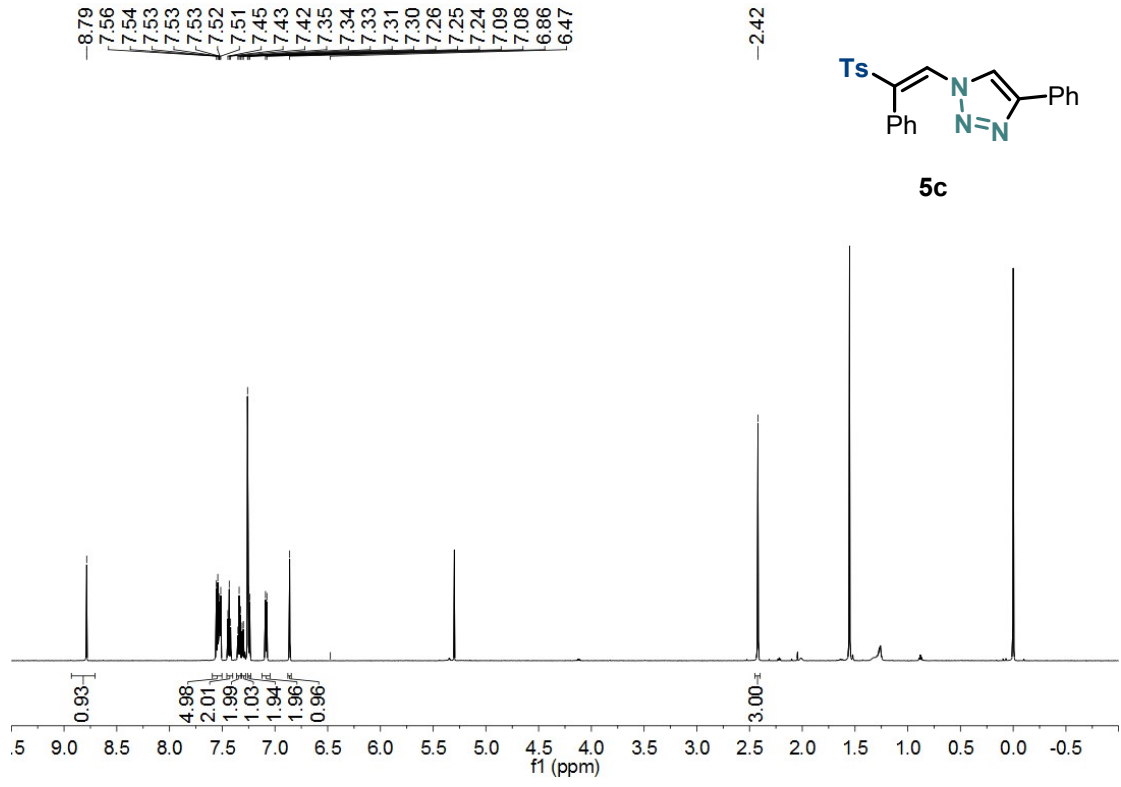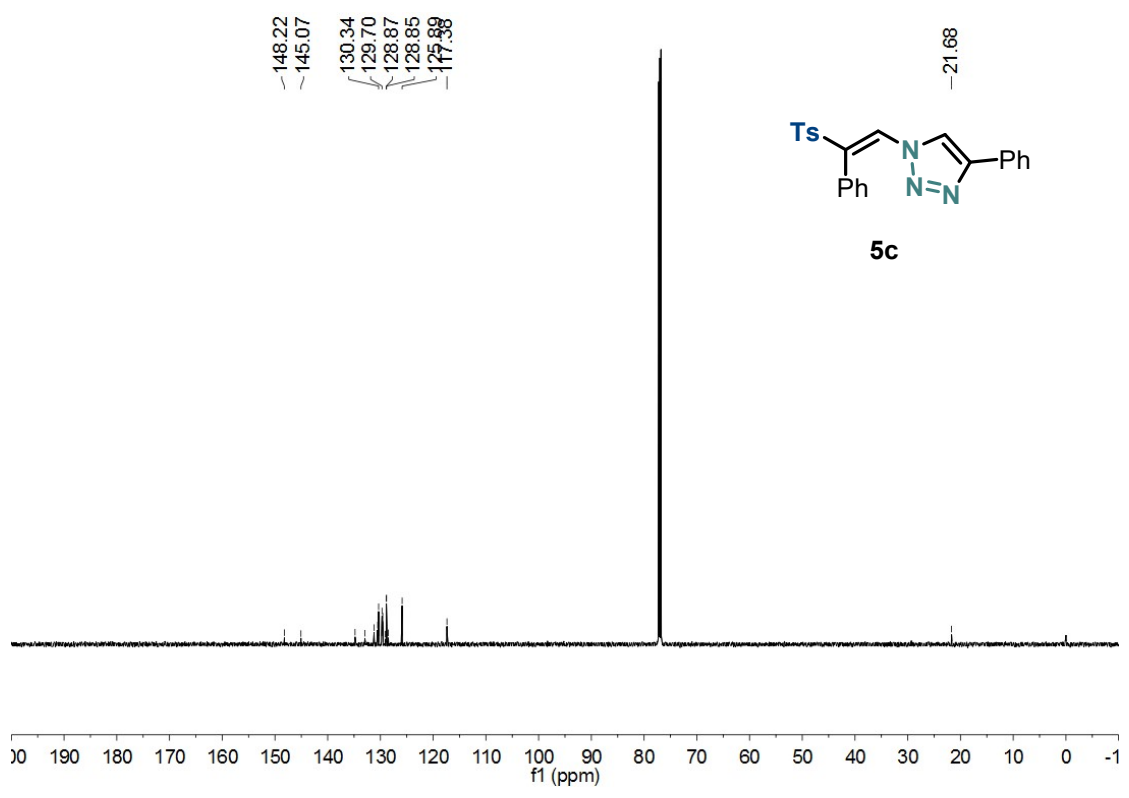

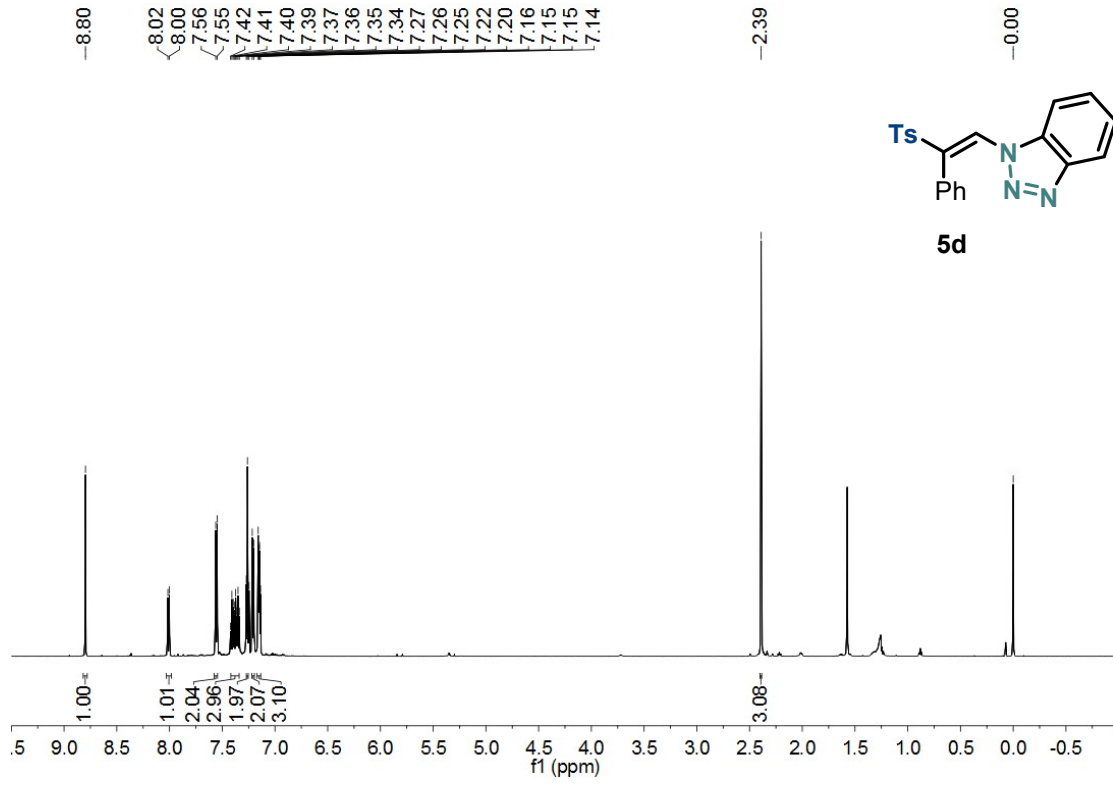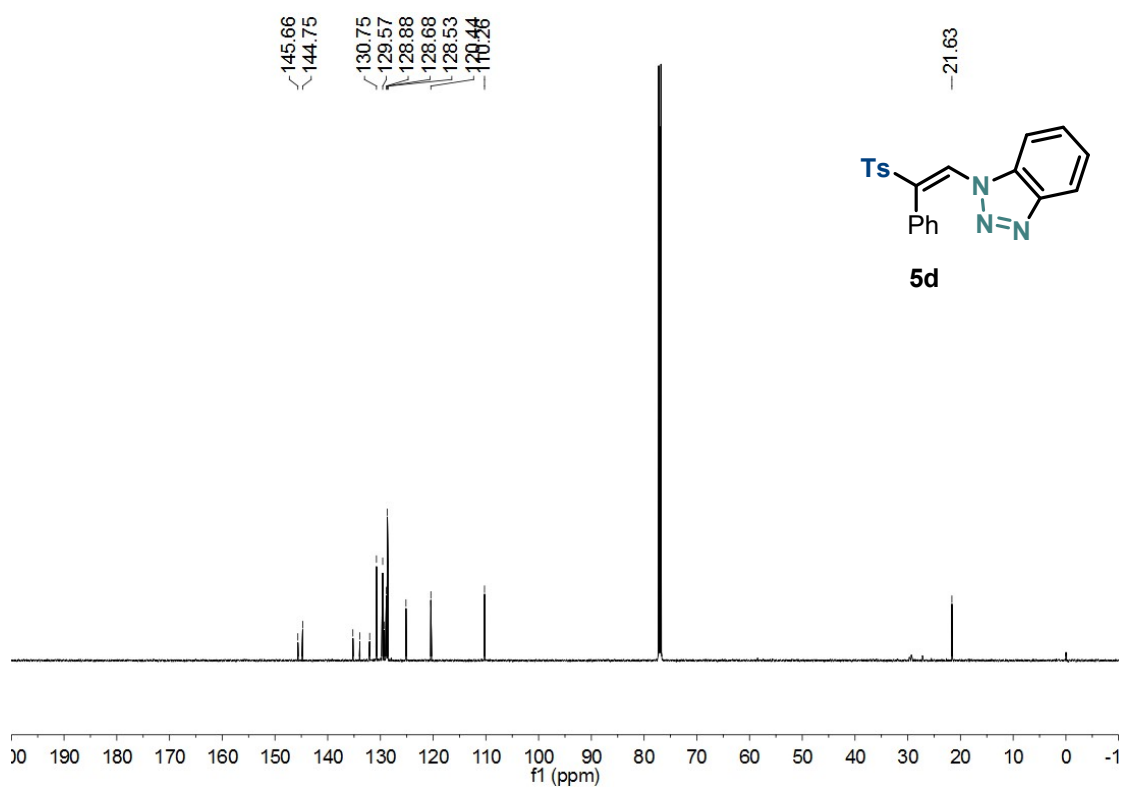

## VIII. Mechanistic study using DFT computations

### Computational details

All calculations were performed using Gaussian16 suite of programs<sup>[2]</sup> using the B3LYP functional.<sup>[3,4]</sup> The I atoms was represented with the Stuttgart-Dresden relativistic effective core potential associated with their adapted basis set.<sup>[5,6]</sup> All the other atoms C, H, O and S were described with 6-31G(d) basis set.<sup>[7,8]</sup> The nature of the extrema (minimum) was established with analytical frequencies calculations and geometry optimizations were computed without any symmetry constraints. Intrinsic Reaction Paths (IRPs)<sup>[9,10]</sup> were traced from the various transition structures to obtain the connected intermediates. The SMD solvation model was used to evaluate solvation energies by a self-consistent reaction field (SCRF) approach based on accurate numerical solutions of the Poisson–Boltzmann equation.<sup>[11]</sup> DMSO was chosen as solvent. Marcus electron transfer theory was employed to evaluate the single electron transfer (SET) process.<sup>[12-14]</sup> The radii of the oxidant/reductant was calculated by the Multiwfn program.<sup>[15-17]</sup> 3D diagrams of the computed species were generated using CYLview visualization software.<sup>[18]</sup>

### Activation Barrier of Single Electron Transfer Step

According to the Marcus equation, the reorganization energy  $\lambda$  ( $\lambda = \lambda_i + \lambda_o$ ) is normally decomposed into internal energy ( $\lambda_i$ ) and external energy ( $\lambda_o$ ).

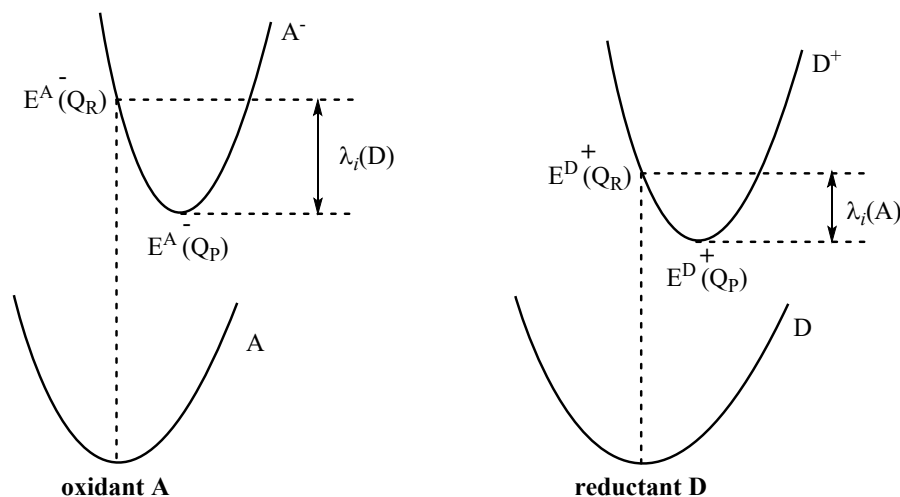

The internal reorganization energy  $\lambda_i$  can be estimated according to the equation:

$$\lambda_i = \lambda_i(D) + \lambda_i(A) = [E^{A^-}(Q_R) - E^A(Q_P)] + [E^{D^+}(Q_R) - E^D(Q_P)] \quad (S1)$$

where  $Q_R$  and  $Q_P$  are the equilibrium geometries of the reactants and products, respectively.

The single electron transfer (SET) reaction of our system:

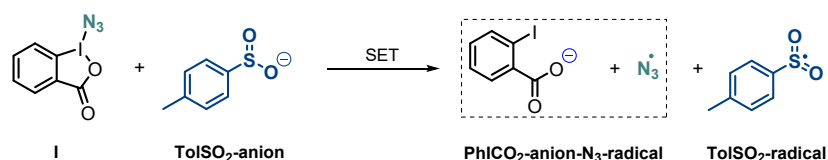

Here, the oxidant in the reactant is **3**, while the reductant in the corresponding product is azide radical. Azide radical and  $\text{o-IC}_6\text{H}_4\text{CO}_2^-$  are adduct in the SET process, so we treat the adduct **PhICO<sub>2</sub>-anion-N<sub>3</sub>-radical** as the reductant in the corresponding product. The reductant in the reactant is **TolSO<sub>2</sub>-anion**, while the oxidant in the corresponding product is **TolSO<sub>2</sub>-radical**. Put their single-point energies into the equation S1,  $\lambda_i$  can be estimated.

$$\lambda_i = \{[-595.2214927 - (-595.2801927)] + [-819.5178329 - (-819.5289605)]\} \times 627.51$$

$$= 43.82 \text{ kcal/mol}$$

In addition, the external reorganization energy  $\lambda_o$  and the activation barrier may be calculated from equation (S2–S3):

$$\lambda_o = (332 \text{ kcal/mol}) \left( \frac{1}{2a_1} + \frac{1}{2a_2} - \frac{1}{R} \right) \left( \frac{1}{\epsilon_{op}} - \frac{1}{\epsilon} \right) \quad (\text{S2})$$

$$\Delta G^\ddagger = \frac{(\Delta G_r + \lambda)^2}{4\lambda} \quad (\text{S3})$$

where  $a_1$  is the radii of the oxidant,  $a_2$  is the radii of the reductant,  $R = a_1 + a_2$ ,  $\epsilon_{op}$  is the optical dielectric constant ( $\epsilon_{op} = 2.25$ ),  $\epsilon$  is the static dielectric constant for the DMSO solvent ( $\epsilon = 48.9$ ), and  $\Delta G_r$  is the free energy change of the reaction.

**Table S1.** Estimation of the activation barrier for SET step.

| SET step | $a_1$ (Å) | $a_2$ (Å) | R (Å)  | $\lambda$ (kcal/mol) | $\Delta G_r$ (kcal/mol) | $\Delta G^\ddagger$ (kcal/mol) |
|----------|-----------|-----------|--------|----------------------|-------------------------|--------------------------------|
|          | 5.306     | 5.012     | 10.318 | 57.48                | -12.36                  | 8.85                           |

## Cartesian coordinates of all optimized structures

### TolSO<sub>2</sub>-anion

|                               |                             |
|-------------------------------|-----------------------------|
| Zero-point correction=        | 0.125192 (Hartree/Particle) |
| Thermal correction to Energy= | 0.133865                    |

|                                              |             |
|----------------------------------------------|-------------|
| Thermal correction to Enthalpy=              | 0.134810    |
| Thermal correction to Gibbs Free Energy=     | 0.090706    |
| Sum of electronic and zero-point Energies=   | -819.551988 |
| Sum of electronic and thermal Energies=      | -819.543315 |
| Sum of electronic and thermal Enthalpies=    | -819.542370 |
| Sum of electronic and thermal Free Energies= | -819.586474 |

|   |             |             |             |
|---|-------------|-------------|-------------|
| S | -2.22916000 | -0.01695600 | -0.34036900 |
| O | -2.63477300 | -1.26719300 | 0.44569100  |
| O | -2.62981700 | 1.30400200  | 0.32295900  |
| C | 3.95276000  | 0.00931800  | 0.08898300  |
| C | 0.33297400  | -1.20880100 | -0.10205800 |
| C | 1.72724400  | -1.20285200 | -0.02341800 |
| C | 2.44300500  | 0.00367300  | 0.03630500  |
| C | 1.71487900  | 1.20295300  | 0.02484700  |
| C | 0.31967300  | 1.19738900  | -0.05634400 |
| C | -0.38147700 | -0.00808800 | -0.11745400 |
| H | 4.33919900  | -0.85381500 | 0.64299300  |
| H | 4.33429300  | 0.91923600  | 0.56531700  |
| H | 4.38779300  | -0.03526100 | -0.91935500 |
| H | -0.21309400 | -2.14893600 | -0.13068500 |
| H | 2.27162600  | -2.14582900 | -0.00116800 |
| H | 2.24898600  | 2.15005400  | 0.08576700  |
| H | -0.23987200 | 2.12982200  | -0.05131700 |

### 3

|                                 |                             |
|---------------------------------|-----------------------------|
| Zero-point correction=          | 0.105450 (Hartree/Particle) |
| Thermal correction to Energy=   | 0.117157                    |
| Thermal correction to Enthalpy= | 0.118101                    |

|                                              |             |
|----------------------------------------------|-------------|
| Thermal correction to Gibbs Free Energy=     | 0.065235    |
| Sum of electronic and zero-point Energies=   | -595.015339 |
| Sum of electronic and thermal Energies=      | -595.003632 |
| Sum of electronic and thermal Enthalpies=    | -595.002688 |
| Sum of electronic and thermal Free Energies= | -595.055554 |

|   |             |             |             |
|---|-------------|-------------|-------------|
| C | -0.62755100 | -0.66242400 | -0.12045000 |
| C | -1.88751700 | -0.12775600 | 0.09429500  |
| C | -2.96433600 | -1.02129800 | 0.16235000  |
| C | -2.74432900 | -2.38977300 | 0.01780100  |
| C | -1.45201300 | -2.88037300 | -0.19781800 |
| C | -0.35796100 | -2.00883400 | -0.27259100 |
| C | -2.06785400 | 1.35318900  | 0.25200600  |
| H | -3.95942400 | -0.62115800 | 0.33019400  |
| H | -3.58078700 | -3.07990200 | 0.07323500  |
| H | -1.28383400 | -3.94758700 | -0.30947000 |
| H | 0.64818100  | -2.37392100 | -0.44326200 |
| O | -3.16523700 | 1.86418100  | 0.43364400  |
| O | -0.95368600 | 2.05747800  | 0.18225400  |
| I | 0.89923800  | 0.87304300  | -0.19269300 |
| N | 2.47359800  | -0.68585200 | -0.65228700 |
| N | 3.14394800  | -1.00024900 | 0.32510200  |
| N | 3.82202300  | -1.34223800 | 1.18737000  |

### TolSO<sub>2</sub>-radical

|                                          |                             |
|------------------------------------------|-----------------------------|
| Zero-point correction=                   | 0.126032 (Hartree/Particle) |
| Thermal correction to Energy=            | 0.135595                    |
| Thermal correction to Enthalpy=          | 0.136539                    |
| Thermal correction to Gibbs Free Energy= | 0.088820                    |

|                                              |             |
|----------------------------------------------|-------------|
| Sum of electronic and zero-point Energies=   | -819.402929 |
| Sum of electronic and thermal Energies=      | -819.393366 |
| Sum of electronic and thermal Enthalpies=    | -819.392422 |
| Sum of electronic and thermal Free Energies= | -819.440141 |

|   |             |             |             |
|---|-------------|-------------|-------------|
| S | -2.15906600 | -0.00033900 | -0.24282700 |
| O | -2.67110200 | -1.29686000 | 0.29253500  |
| O | -2.67192400 | 1.29620300  | 0.29164100  |
| C | 3.92892400  | -0.00026900 | 0.10882100  |
| C | 0.31826200  | -1.22028300 | -0.08261300 |
| C | 1.70911500  | -1.20667400 | -0.01945900 |
| C | 2.42525400  | 0.00106600  | 0.01570400  |
| C | 1.70866400  | 1.20787500  | -0.01891600 |
| C | 0.31726900  | 1.22070700  | -0.08216200 |
| C | -0.36128400 | 0.00021700  | -0.08853300 |
| H | 4.25039700  | -0.06550000 | 1.15728800  |
| H | 4.35652700  | 0.91706300  | -0.30804900 |
| H | 4.36098700  | -0.85838200 | -0.41652600 |
| H | -0.22491100 | -2.15870300 | -0.11112200 |
| H | 2.24816800  | -2.15017300 | 0.00132400  |
| H | 2.24712500  | 2.15161900  | 0.00227100  |
| H | -0.22626000 | 2.15892700  | -0.11040600 |

### PhCO<sub>2</sub>-anion-N<sub>3</sub>-radical

|                                            |                             |
|--------------------------------------------|-----------------------------|
| Zero-point correction=                     | 0.103280 (Hartree/Particle) |
| Thermal correction to Energy=              | 0.116107                    |
| Thermal correction to Enthalpy=            | 0.117051                    |
| Thermal correction to Gibbs Free Energy=   | 0.058608                    |
| Sum of electronic and zero-point Energies= | -595.176913                 |

|                                              |             |
|----------------------------------------------|-------------|
| Sum of electronic and thermal Energies=      | -595.164086 |
| Sum of electronic and thermal Enthalpies=    | -595.163141 |
| Sum of electronic and thermal Free Energies= | -595.221585 |

|   |             |             |             |
|---|-------------|-------------|-------------|
| C | 0.62158900  | 0.58183900  | -0.13089200 |
| C | 1.97000800  | 0.31716800  | 0.10284700  |
| C | 2.83756800  | 1.41990000  | 0.15737000  |
| C | 2.37168400  | 2.72092000  | -0.01417100 |
| C | 1.01206400  | 2.94643600  | -0.24643800 |
| C | 0.12287000  | 1.87018700  | -0.30675300 |
| C | 2.55344600  | -1.07642500 | 0.30204100  |
| H | 3.88802000  | 1.21556900  | 0.33961700  |
| H | 3.06367500  | 3.55733500  | 0.03308600  |
| H | 0.63595300  | 3.95703700  | -0.38128800 |
| H | -0.93566700 | 2.03093700  | -0.48587200 |
| O | 3.77767300  | -1.18317300 | 0.50224500  |
| O | 1.73930700  | -2.05935300 | 0.25122400  |
| I | -0.79403000 | -1.05258100 | -0.23208300 |
| N | -3.14090500 | 0.85670000  | -0.68836000 |
| N | -3.69672900 | 0.87033300  | 0.36766000  |
| N | -4.25373500 | 0.88525100  | 1.40399400  |

**adduct1**

|                                            |                             |
|--------------------------------------------|-----------------------------|
| Zero-point correction=                     | 0.120337 (Hartree/Particle) |
| Thermal correction to Energy=              | 0.131165                    |
| Thermal correction to Enthalpy=            | 0.132109                    |
| Thermal correction to Gibbs Free Energy=   | 0.080236                    |
| Sum of electronic and zero-point Energies= | -472.418772                 |
| Sum of electronic and thermal Energies=    | -472.407944                 |



Sum of electronic and thermal Enthalpies= -472.407000  
 Sum of electronic and thermal Free Energies= -472.458873

|   |             |             |             |
|---|-------------|-------------|-------------|
| C | -2.02296200 | 1.93985600  | 0.00159800  |
| C | -0.91424100 | 1.44128900  | 0.00122900  |
| C | 2.20982500  | -0.18917300 | -1.21357800 |
| C | 0.97610200  | 0.45200700  | -1.22069300 |
| C | 0.34479100  | 0.78271100  | 0.00066000  |
| C | 2.20923300  | -0.19233000 | 1.21328400  |
| C | 2.82879000  | -0.51074200 | -0.00041400 |
| C | 0.97550000  | 0.44880200  | 1.22149500  |
| H | 3.79335000  | -1.01054900 | -0.00080300 |
| H | 2.69191100  | -0.43982500 | -2.15404700 |
| H | 2.69091100  | -0.44546700 | 2.15329500  |
| H | 0.48977700  | 0.70690800  | -2.15710200 |
| H | 0.48869500  | 0.70131000  | 2.15830100  |
| H | -2.96734900 | 2.44274600  | 0.00203500  |
| N | -3.20492000 | -0.61420500 | -0.00134600 |
| N | -2.23073700 | -1.29053800 | -0.00107000 |
| N | -1.25427500 | -1.95092000 | -0.00089200 |

## adduct2

Zero-point correction= 0.236044 (Hartree/Particle)  
 Thermal correction to Energy= 0.254490  
 Thermal correction to Enthalpy= 0.255434  
 Thermal correction to Gibbs Free Energy= 0.180069  
 Sum of electronic and zero-point Energies= -1127.694164  
 Sum of electronic and thermal Energies= -1127.675719  
 Sum of electronic and thermal Enthalpies= -1127.674774

Sum of electronic and thermal Free Energies= -1127.750139

|   |             |             |             |
|---|-------------|-------------|-------------|
| S | -0.78595400 | 1.85420700  | -0.35218400 |
| O | -0.03919500 | 1.63363500  | -1.62644100 |
| O | -1.40751200 | 3.18170700  | -0.06221200 |
| C | 0.76965300  | -0.20190600 | 2.00197700  |
| C | 1.81499600  | -0.33394200 | 1.40193900  |
| C | 5.38256900  | 0.09369700  | 0.37383900  |
| C | 4.18590200  | 0.24789100  | 1.07053300  |
| C | 3.04592900  | -0.48671800 | 0.68897800  |
| C | 4.33297000  | -1.52180900 | -1.09109600 |
| C | 5.46000700  | -0.78949000 | -0.70692200 |
| C | 3.13152700  | -1.37505800 | -0.40113800 |
| C | -5.07579100 | -2.45198600 | 0.16620600  |
| C | -1.87255200 | -0.64029400 | -0.84741100 |
| C | -2.85024700 | -1.62233100 | -0.70744500 |
| C | -4.01440000 | -1.38969900 | 0.04248900  |
| C | -4.17650000 | -0.13880900 | 0.65897700  |
| C | -3.21282600 | 0.85931300  | 0.53349800  |
| C | -2.07985600 | 0.60035300  | -0.24050800 |
| H | 6.39518700  | -0.90688700 | -1.24755500 |
| H | 6.25663100  | 0.66456600  | 0.67500000  |
| H | 4.38939700  | -2.20903100 | -1.93082500 |
| H | 4.12293800  | 0.93346600  | 1.91030400  |
| H | 2.25434900  | -1.94264400 | -0.69723700 |
| H | -0.14147000 | -0.10514800 | 2.55411300  |
| H | -5.81429000 | -2.35610200 | -0.64149100 |
| H | -5.61744500 | -2.36746500 | 1.11391100  |
| H | -4.64614800 | -3.45656200 | 0.09700100  |
| H | -0.97612600 | -0.83214100 | -1.42728300 |
| H | -2.70553500 | -2.58679100 | -1.18719600 |

|   |             |            |            |
|---|-------------|------------|------------|
| H | -5.06939100 | 0.05761900 | 1.24681200 |
| H | -3.34745600 | 1.82179500 | 1.01510600 |

## TS1

|                                              |                             |  |  |
|----------------------------------------------|-----------------------------|--|--|
| Zero-point correction=                       | 0.120790 (Hartree/Particle) |  |  |
| Thermal correction to Energy=                | 0.130617                    |  |  |
| Thermal correction to Enthalpy=              | 0.131562                    |  |  |
| Thermal correction to Gibbs Free Energy=     | 0.082481                    |  |  |
| Sum of electronic and zero-point Energies=   | -472.416202                 |  |  |
| Sum of electronic and thermal Energies=      | -472.406374                 |  |  |
| Sum of electronic and thermal Enthalpies=    | -472.405430                 |  |  |
| Sum of electronic and thermal Free Energies= | -472.454511                 |  |  |

|   |             |             |             |
|---|-------------|-------------|-------------|
| C | -1.95481000 | -1.64947100 | 0.00108500  |
| C | -0.78043200 | -1.27317800 | 0.00082600  |
| C | 2.38995500  | 0.23535400  | 1.21537600  |
| C | 1.13561400  | -0.35960200 | 1.22488800  |
| C | 0.48863000  | -0.66404900 | 0.00042800  |
| C | 2.39017100  | 0.23335600  | -1.21565900 |
| C | 3.01921100  | 0.53271200  | -0.00033100 |
| C | 1.13582900  | -0.36161200 | -1.22441900 |
| H | 4.00098600  | 0.99756700  | -0.00062600 |
| H | 2.88285900  | 0.46997000  | 2.15422700  |
| H | 2.88323800  | 0.46645300  | -2.15480400 |
| H | 0.63875200  | -0.59496500 | 2.16071200  |
| H | 0.63912000  | -0.59848000 | -2.15994400 |
| H | -2.76478900 | -2.35067700 | 0.00152300  |
| N | -3.30070600 | 0.03852000  | -0.00040000 |
| N | -2.62819200 | 1.03448300  | -0.00068100 |

|   |             |            |             |
|---|-------------|------------|-------------|
| N | -1.96041100 | 1.99115000 | -0.00095500 |
|---|-------------|------------|-------------|

**TS2**

|                                              |  |  |                             |
|----------------------------------------------|--|--|-----------------------------|
| Zero-point correction=                       |  |  | 0.236299 (Hartree/Particle) |
| Thermal correction to Energy=                |  |  | 0.253452                    |
| Thermal correction to Enthalpy=              |  |  | 0.254396                    |
| Thermal correction to Gibbs Free Energy=     |  |  | 0.185684                    |
| Sum of electronic and zero-point Energies=   |  |  | -1127.687917                |
| Sum of electronic and thermal Energies=      |  |  | -1127.670764                |
| Sum of electronic and thermal Enthalpies=    |  |  | -1127.669820                |
| Sum of electronic and thermal Free Energies= |  |  | -1127.738532                |

|   |             |             |             |
|---|-------------|-------------|-------------|
| S | 0.58611800  | -1.63816600 | -0.38191000 |
| O | -0.15569500 | -1.30168900 | -1.62789600 |
| O | 1.11813500  | -3.01964600 | -0.19409300 |
| C | -0.79743700 | -1.09134400 | 1.52150700  |
| C | -1.83315400 | -0.50527300 | 1.18707100  |
| C | -5.20919200 | 0.05730300  | -0.27031400 |
| C | -4.10236800 | -0.59405100 | 0.26191100  |
| C | -2.95733300 | 0.14814900  | 0.63810800  |
| C | -4.07197100 | 2.18997100  | -0.06378600 |
| C | -5.19883700 | 1.44726500  | -0.43516100 |
| C | -2.95745400 | 1.55366300  | 0.47059600  |
| C | 5.20815300  | 2.30483800  | 0.23397900  |
| C | 1.88079200  | 0.76809700  | -0.83211000 |
| C | 2.93112100  | 1.66782900  | -0.66705700 |
| C | 4.06934100  | 1.32856200  | 0.08255400  |
| C | 4.12817200  | 0.05554700  | 0.66947800  |
| C | 3.08760700  | -0.85966000 | 0.51633200  |

|   |             |             |             |
|---|-------------|-------------|-------------|
| C | 1.97722500  | -0.49801400 | -0.24887700 |
| H | -6.06682900 | 1.95038100  | -0.85188900 |
| H | -6.08421500 | -0.51830700 | -0.55863100 |
| H | -4.06467500 | 3.26857200  | -0.19278000 |
| H | -4.10419100 | -1.67172000 | 0.39258600  |
| H | -2.08048000 | 2.12410100  | 0.76060600  |
| H | -0.15240000 | -1.51443000 | 2.27016400  |
| H | 4.84213300  | 3.33258200  | 0.33296600  |
| H | 5.86308500  | 2.27868200  | -0.64755300 |
| H | 5.82368300  | 2.06917700  | 1.10789800  |
| H | 1.00647500  | 1.04014100  | -1.41421700 |
| H | 2.86637500  | 2.65079000  | -1.12704200 |
| H | 5.00011000  | -0.22396100 | 1.25537700  |
| H | 3.14552400  | -1.84196000 | 0.97358800  |

### Int1

|                                              |                             |
|----------------------------------------------|-----------------------------|
| Zero-point correction=                       | 0.123397 (Hartree/Particle) |
| Thermal correction to Energy=                | 0.132920                    |
| Thermal correction to Enthalpy=              | 0.133864                    |
| Thermal correction to Gibbs Free Energy=     | 0.085991                    |
| Sum of electronic and zero-point Energies=   | -472.443432                 |
| Sum of electronic and thermal Energies=      | -472.433908                 |
| Sum of electronic and thermal Enthalpies=    | -472.432964                 |
| Sum of electronic and thermal Free Energies= | -472.480837                 |

|   |             |             |             |
|---|-------------|-------------|-------------|
| C | -1.98717800 | -1.33765000 | -0.00136900 |
| C | -0.72125700 | -1.01469000 | -0.00106300 |
| C | 2.54813800  | 0.24280300  | 1.21442800  |
| C | 1.25290900  | -0.24919500 | 1.22751200  |

|   |             |             |             |
|---|-------------|-------------|-------------|
| C | 0.56130300  | -0.50587800 | -0.00053400 |
| C | 2.54804500  | 0.24557500  | -1.21394100 |
| C | 3.20634700  | 0.49451100  | 0.00050600  |
| C | 1.25282600  | -0.24640500 | -1.22804700 |
| H | 4.22191300  | 0.87961300  | 0.00089700  |
| H | 3.05671800  | 0.43516000  | 2.15549300  |
| H | 3.05657200  | 0.44005900  | -2.15459600 |
| H | 0.74380200  | -0.44436700 | 2.16645500  |
| H | 0.74365400  | -0.43945800 | -2.16738900 |
| H | -2.34395200 | -2.36525700 | -0.00250800 |
| N | -3.11912600 | -0.43875700 | -0.00044500 |
| N | -2.88241600 | 0.77436500  | 0.00086500  |
| N | -2.77638600 | 1.91008200  | 0.00196500  |

## Int2

|                                              |                             |
|----------------------------------------------|-----------------------------|
| Zero-point correction=                       | 0.238469 (Hartree/Particle) |
| Thermal correction to Energy=                | 0.255246                    |
| Thermal correction to Enthalpy=              | 0.256190                    |
| Thermal correction to Gibbs Free Energy=     | 0.189438                    |
| Sum of electronic and zero-point Energies=   | -1127.701691                |
| Sum of electronic and thermal Energies=      | -1127.684914                |
| Sum of electronic and thermal Enthalpies=    | -1127.683970                |
| Sum of electronic and thermal Free Energies= | -1127.750722                |

|   |           |           |           |
|---|-----------|-----------|-----------|
| S | -0.493282 | -1.494455 | 0.346873  |
| O | 0.199798  | -1.145131 | 1.601695  |
| O | -0.902887 | -2.893790 | 0.100695  |
| C | 0.562174  | -0.998898 | -1.062416 |
| C | 1.713507  | -0.436602 | -0.875507 |

|   |           |           |           |
|---|-----------|-----------|-----------|
| C | 5.259990  | -0.035591 | 0.099547  |
| C | 4.066276  | -0.642728 | -0.255220 |
| C | 2.902305  | 0.151929  | -0.501755 |
| C | 4.214525  | 2.153323  | -0.024360 |
| C | 5.346695  | 1.360171  | 0.217888  |
| C | 3.007521  | 1.573603  | -0.380075 |
| C | -5.406651 | 2.069492  | -0.231567 |
| C | -1.977530 | 0.781803  | 0.840603  |
| C | -3.098899 | 1.594113  | 0.691449  |
| C | -4.186740 | 1.193622  | -0.101041 |
| C | -4.121946 | -0.049990 | -0.747489 |
| C | -3.009282 | -0.877990 | -0.609170 |
| C | -1.944028 | -0.454650 | 0.189507  |
| H | 6.287862  | 1.825577  | 0.495558  |
| H | 6.136029  | -0.650269 | 0.287922  |
| H | 4.280890  | 3.234007  | 0.067777  |
| H | 3.997137  | -1.721993 | -0.347974 |
| H | 2.130997  | 2.185417  | -0.568689 |
| H | 0.112575  | -1.265010 | -2.020161 |
| H | -5.141371 | 3.131521  | -0.198791 |
| H | -6.107410 | 1.884242  | 0.593912  |
| H | -5.942419 | 1.872441  | -1.165667 |
| H | -1.144450 | 1.099402  | 1.459140  |
| H | -3.131425 | 2.554692  | 1.199243  |
| H | -4.954186 | -0.375841 | -1.366121 |
| H | -2.974511 | -1.841186 | -1.107602 |

### adduct3

Zero-point correction= 0.249641 (Hartree/Particle)  
Thermal correction to Energy= 0.271278

|                                              |              |
|----------------------------------------------|--------------|
| Thermal correction to Enthalpy=              | 0.272223     |
| Thermal correction to Gibbs Free Energy=     | 0.187711     |
| Sum of electronic and zero-point Energies=   | -1291.847631 |
| Sum of electronic and thermal Energies=      | -1291.825994 |
| Sum of electronic and thermal Enthalpies=    | -1291.825049 |
| Sum of electronic and thermal Free Energies= | -1291.909561 |

|   |             |             |             |
|---|-------------|-------------|-------------|
| C | -5.75500800 | -1.17411700 | -0.24965700 |
| C | -4.48907700 | -1.28180100 | -0.80280700 |
| C | -3.34241000 | -0.81155300 | -0.08545100 |
| C | -3.54718300 | -0.24003700 | 1.21201800  |
| C | -4.82343100 | -0.14378400 | 1.74266800  |
| C | -5.93502300 | -0.60740700 | 1.02177400  |
| H | -6.61528100 | -1.53275400 | -0.80864500 |
| H | -4.34919200 | -1.72081600 | -1.78591600 |
| H | -2.68603000 | 0.12054400  | 1.76610400  |
| H | -4.96184500 | 0.29661900  | 2.72656600  |
| H | -6.93154200 | -0.52795200 | 1.44645300  |
| C | -2.07180600 | -0.93156000 | -0.61070400 |
| C | -0.88909800 | -0.86264600 | -1.16122300 |
| H | -0.14484300 | -1.65254400 | -1.09118200 |
| N | -1.70631200 | 2.11941400  | -2.43040200 |
| N | -1.09857500 | 1.19315700  | -2.16072200 |
| N | -0.34681800 | 0.23816400  | -1.92993200 |
| C | 4.44655400  | -1.58760700 | 0.00597400  |
| C | 3.28467300  | -1.82592200 | 0.75742500  |
| C | 2.34715500  | -0.81934800 | 0.97775800  |
| C | 2.59389300  | 0.44992100  | 0.44960300  |
| C | 3.72556400  | 0.71728000  | -0.32370700 |
| C | 4.64830100  | -0.30540100 | -0.52958600 |
| H | 3.11055500  | -2.81353400 | 1.17639200  |



|   |            |             |             |
|---|------------|-------------|-------------|
| H | 1.45297500 | -1.01426500 | 1.55973200  |
| H | 3.89090400 | 1.70350400  | -0.74394400 |
| H | 5.53985400 | -0.10416800 | -1.11773900 |
| C | 5.46516200 | -2.67778200 | -0.20371400 |
| H | 6.21960800 | -2.65970600 | 0.59470000  |
| H | 4.99942300 | -3.66842900 | -0.18956600 |
| H | 5.99415600 | -2.55286900 | -1.15410700 |
| S | 1.35676900 | 1.74507300  | 0.66744600  |
| O | 2.04045300 | 3.06562600  | 0.52551100  |
| O | 0.57020800 | 1.42945400  | 1.89788800  |

#### adduct4

|                                              |                             |
|----------------------------------------------|-----------------------------|
| Zero-point correction=                       | 0.250091 (Hartree/Particle) |
| Thermal correction to Energy=                | 0.271503                    |
| Thermal correction to Enthalpy=              | 0.272447                    |
| Thermal correction to Gibbs Free Energy=     | 0.190054                    |
| Sum of electronic and zero-point Energies=   | -1291.847899                |
| Sum of electronic and thermal Energies=      | -1291.826487                |
| Sum of electronic and thermal Enthalpies=    | -1291.825543                |
| Sum of electronic and thermal Free Energies= | -1291.907936                |

|   |            |             |             |
|---|------------|-------------|-------------|
| C | 4.78968900 | -1.68559300 | 0.24634200  |
| C | 3.86407500 | -0.76872300 | 0.71812900  |
| C | 3.90230300 | 0.59342000  | 0.27677900  |
| C | 4.92445600 | 0.97093500  | -0.65263100 |
| C | 5.83863700 | 0.03490100  | -1.10896800 |
| C | 5.78203500 | -1.29596400 | -0.66662700 |
| H | 4.74308000 | -2.71634400 | 0.58768000  |
| H | 3.09230700 | -1.07028900 | 1.41944200  |
| H | 4.96882800 | 2.00074800  | -0.99364700 |

|   |             |             |             |
|---|-------------|-------------|-------------|
| H | 6.60608200  | 0.33765300  | -1.81643200 |
| H | 6.50349200  | -2.02198600 | -1.03011600 |
| C | 3.00031000  | 1.52082300  | 0.75843500  |
| C | 2.02879300  | 2.33722100  | 1.06951400  |
| H | 2.05995000  | 3.01195100  | 1.92201300  |
| N | 0.26664500  | 1.16821500  | -1.52209800 |
| N | 0.56395500  | 1.78172500  | -0.60706900 |
| N | 0.77303800  | 2.50344900  | 0.37266100  |
| C | -5.13975500 | 0.52468100  | -0.22465400 |
| C | -4.05072900 | 1.20673200  | 0.34419300  |
| C | -2.80947100 | 0.59400000  | 0.48879600  |
| C | -2.66937000 | -0.73447000 | 0.07735600  |
| C | -3.72255100 | -1.43744600 | -0.50964300 |
| C | -4.95549800 | -0.80165200 | -0.64349400 |
| H | -4.17717500 | 2.23268900  | 0.68033000  |
| H | -1.97768100 | 1.13074200  | 0.93242200  |
| H | -3.59186500 | -2.46336700 | -0.83673900 |
| H | -5.78805900 | -1.34643500 | -1.08041200 |
| C | -6.46752700 | 1.21568600  | -0.39787900 |
| H | -6.42876600 | 1.92665400  | -1.23398800 |
| H | -7.26771800 | 0.49929400  | -0.60670900 |
| H | -6.73700700 | 1.78749700  | 0.49723400  |
| S | -1.05168400 | -1.52493200 | 0.19519300  |
| O | -1.25854900 | -3.00348100 | 0.23707200  |
| O | -0.27849800 | -0.83788400 | 1.27261500  |

**TS3-trans**

|                                 |                             |
|---------------------------------|-----------------------------|
| Zero-point correction=          | 0.250685 (Hartree/Particle) |
| Thermal correction to Energy=   | 0.270558                    |
| Thermal correction to Enthalpy= | 0.271503                    |

|                                              |              |
|----------------------------------------------|--------------|
| Thermal correction to Gibbs Free Energy=     | 0.196795     |
| Sum of electronic and zero-point Energies=   | -1291.837208 |
| Sum of electronic and thermal Energies=      | -1291.817335 |
| Sum of electronic and thermal Enthalpies=    | -1291.816390 |
| Sum of electronic and thermal Free Energies= | -1291.891098 |

|   |             |             |             |
|---|-------------|-------------|-------------|
| C | -4.11489400 | -1.70946300 | -1.34335700 |
| C | -3.10320400 | -0.76733600 | -1.44536700 |
| C | -2.08809300 | -0.67207200 | -0.44152300 |
| C | -2.14857200 | -1.57885200 | 0.65527800  |
| C | -3.17204900 | -2.51177100 | 0.74133300  |
| C | -4.15882300 | -2.58695900 | -0.25102500 |
| H | -4.87816100 | -1.76143800 | -2.11507900 |
| H | -3.06826300 | -0.08837100 | -2.29207600 |
| H | -1.39399500 | -1.53214400 | 1.43180700  |
| H | -3.20500400 | -3.19105700 | 1.58883100  |
| H | -4.95378400 | -3.32336800 | -0.17548900 |
| C | -1.04388800 | 0.25533200  | -0.63637800 |
| C | -0.83461400 | 1.44120100  | -1.26711200 |
| H | 0.05571200  | 1.62854400  | -1.86055200 |
| N | -3.55506500 | 2.74644300  | 0.19472800  |
| N | -2.60831000 | 2.60612300  | -0.42013400 |
| N | -1.57941800 | 2.61908000  | -1.12229000 |
| C | 4.41172000  | -0.63873300 | -0.76013800 |
| C | 3.67063200  | -1.58702200 | -0.03849600 |
| C | 2.49142500  | -1.23548500 | 0.61702100  |
| C | 2.05292600  | 0.08858100  | 0.55883900  |
| C | 2.76253100  | 1.05323800  | -0.15991000 |
| C | 3.93864800  | 0.68210000  | -0.80938900 |
| H | 4.01923500  | -2.61555000 | 0.00990900  |
| H | 1.92842600  | -1.97854600 | 1.17242600  |

|   |            |             |             |
|---|------------|-------------|-------------|
| H | 2.41149400 | 2.07907300  | -0.19777500 |
| H | 4.49869700 | 1.43165600  | -1.36317900 |
| C | 5.69686000 | -1.02096900 | -1.45012500 |
| H | 6.56471100 | -0.77667900 | -0.82259400 |
| H | 5.73505500 | -2.09489300 | -1.65865600 |
| H | 5.81891700 | -0.47941900 | -2.39439400 |
| S | 0.48686100 | 0.53668700  | 1.34255500  |
| O | 0.52318000 | 2.00924000  | 1.58429100  |
| O | 0.31595900 | -0.37887300 | 2.51719700  |

### TS3-cis

|                                              |                             |
|----------------------------------------------|-----------------------------|
| Zero-point correction=                       | 0.250743 (Hartree/Particle) |
| Thermal correction to Energy=                | 0.270507                    |
| Thermal correction to Enthalpy=              | 0.271451                    |
| Thermal correction to Gibbs Free Energy=     | 0.197867                    |
| Sum of electronic and zero-point Energies=   | -1291.837799                |
| Sum of electronic and thermal Energies=      | -1291.818035                |
| Sum of electronic and thermal Enthalpies=    | -1291.817091                |
| Sum of electronic and thermal Free Energies= | -1291.890675                |

|   |             |             |             |
|---|-------------|-------------|-------------|
| C | -1.81161100 | 3.17658200  | 0.39783300  |
| C | -1.45214200 | 1.84781200  | 0.57331000  |
| C | -2.16507300 | 0.80885900  | -0.08772800 |
| C | -3.25399200 | 1.18331400  | -0.93356100 |
| C | -3.59384800 | 2.51652900  | -1.10687800 |
| C | -2.87648000 | 3.52222600  | -0.44460800 |
| H | -0.64230900 | 1.59980600  | 1.24853700  |
| C | -1.81800300 | -0.55829600 | -0.00087400 |
| C | -2.53634300 | -1.71768000 | 0.05711200  |
| N | -0.41698000 | -3.18755700 | -2.07178200 |

|   |             |             |             |
|---|-------------|-------------|-------------|
| N | -1.25407500 | -2.97548600 | -1.33337100 |
| N | -2.21670700 | -2.92717100 | -0.54169800 |
| C | 3.79154800  | 0.93290000  | -0.73885500 |
| C | 3.17633600  | -0.21417900 | -1.26407500 |
| C | 2.10032600  | -0.81799800 | -0.61595000 |
| C | 1.63443500  | -0.26959900 | 0.58119300  |
| C | 2.21664800  | 0.87929800  | 1.12073200  |
| C | 3.29471700  | 1.46659200  | 0.46027700  |
| C | 4.97333700  | 1.56175600  | -1.43268700 |
| S | 0.20036100  | -1.01853000 | 1.39789500  |
| O | 0.18133200  | -0.49690100 | 2.80060700  |
| O | 0.31266700  | -2.49271500 | 1.18435000  |

### Int3

|                                              |                             |
|----------------------------------------------|-----------------------------|
| Zero-point correction=                       | 0.255857 (Hartree/Particle) |
| Thermal correction to Energy=                | 0.275106                    |
| Thermal correction to Enthalpy=              | 0.276050                    |
| Thermal correction to Gibbs Free Energy=     | 0.203858                    |
| Sum of electronic and zero-point Energies=   | -1291.931012                |
| Sum of electronic and thermal Energies=      | -1291.911762                |
| Sum of electronic and thermal Enthalpies=    | -1291.910818                |
| Sum of electronic and thermal Free Energies= | -1291.983011                |

|   |             |             |             |
|---|-------------|-------------|-------------|
| C | -1.57625200 | -2.74046400 | -0.59920000 |
| C | -1.19855800 | -1.40743900 | -0.76466600 |
| C | -1.48301400 | -0.45991500 | 0.23389700  |
| C | -2.13555700 | -0.87460400 | 1.40732300  |
| C | -2.50750000 | -2.20882200 | 1.56936000  |
| C | -2.23128800 | -3.14295800 | 0.56687700  |
| H | -1.35752700 | -3.46290500 | -1.38071300 |

|   |             |             |             |
|---|-------------|-------------|-------------|
| H | -0.68732600 | -1.09295000 | -1.67020300 |
| H | -2.35474700 | -0.14841000 | 2.18322300  |
| H | -3.01883600 | -2.51816000 | 2.47685700  |
| H | -2.52542800 | -4.18122600 | 0.69491900  |
| C | -1.09939300 | 0.95918800  | 0.03385700  |
| C | -1.68461200 | 1.85601900  | -0.78518300 |
| H | -1.27755600 | 2.85585000  | -0.87868200 |
| N | -4.25826600 | -0.16361700 | -1.70611700 |
| N | -3.50545000 | 0.67717900  | -1.57495600 |
| N | -2.81647400 | 1.71466100  | -1.58799300 |
| C | 3.89794500  | -0.80703000 | -0.64023200 |
| C | 3.20183600  | -1.23794600 | 0.50086900  |
| C | 2.11508300  | -0.52180000 | 0.99608900  |
| C | 1.71849200  | 0.64880900  | 0.34232600  |
| C | 2.39270100  | 1.10261200  | -0.79365100 |
| C | 3.47780500  | 0.37140300  | -1.27449100 |
| H | 3.51705400  | -2.14533800 | 1.01009100  |
| H | 1.59105300  | -0.85845500 | 1.88407100  |
| H | 2.08378200  | 2.01704200  | -1.28967700 |
| H | 4.00930800  | 0.72437600  | -2.15431000 |
| C | 5.06709300  | -1.60040000 | -1.16609500 |
| H | 5.81929000  | -1.76021900 | -0.38410500 |
| H | 4.74544200  | -2.59265100 | -1.50751100 |
| H | 5.54960600  | -1.09347500 | -2.00705200 |
| S | 0.31834300  | 1.58125400  | 0.96337900  |
| O | 0.52092900  | 3.00257300  | 0.60985300  |
| O | 0.12220100  | 1.21480100  | 2.38139600  |

#### Int4

Zero-point correction=

0.255944 (Hartree/Particle)

|                                              |              |
|----------------------------------------------|--------------|
| Thermal correction to Energy=                | 0.275047     |
| Thermal correction to Enthalpy=              | 0.275991     |
| Thermal correction to Gibbs Free Energy=     | 0.205497     |
| Sum of electronic and zero-point Energies=   | -1291.922138 |
| Sum of electronic and thermal Energies=      | -1291.903035 |
| Sum of electronic and thermal Enthalpies=    | -1291.902091 |
| Sum of electronic and thermal Free Energies= | -1291.972585 |

|   |             |             |             |
|---|-------------|-------------|-------------|
| C | -3.71497300 | 1.89512700  | 0.60680000  |
| C | -2.92740800 | 0.75793500  | 0.78360300  |
| C | -2.07475200 | 0.31791700  | -0.24436100 |
| C | -2.03228300 | 1.04416000  | -1.44732100 |
| C | -2.82606500 | 2.17896300  | -1.62194000 |
| C | -3.66725800 | 2.60896200  | -0.59414200 |
| H | -4.37449800 | 2.21952400  | 1.40733500  |
| H | -2.97614200 | 0.20397300  | 1.71381800  |
| H | -1.36885800 | 0.71733800  | -2.24310600 |
| H | -2.78097200 | 2.72804500  | -2.55860400 |
| H | -4.28343300 | 3.49419900  | -0.72718400 |
| C | -1.24087900 | -0.91111900 | -0.11102600 |
| C | -1.44385300 | -1.92940000 | -0.98476800 |
| H | -2.30590900 | -1.81904800 | -1.63652700 |
| N | 1.33080500  | -3.97600500 | -0.86699500 |
| N | 0.31243700  | -3.48603700 | -0.97840000 |
| N | -0.84908900 | -3.15527500 | -1.26172200 |
| C | 3.32708600  | 1.86595100  | -0.30461000 |
| C | 3.37531300  | 0.48591700  | -0.56063500 |
| C | 2.37080800  | -0.36693000 | -0.11116800 |
| C | 1.30111200  | 0.16624200  | 0.61454400  |
| C | 1.22886100  | 1.53462800  | 0.88877100  |
| C | 2.24329800  | 2.37209600  | 0.42778400  |

|   |             |             |             |
|---|-------------|-------------|-------------|
| H | 4.21374700  | 0.07292400  | -1.11568800 |
| H | 2.42862000  | -1.43140300 | -0.31233900 |
| H | 0.40406900  | 1.93727300  | 1.46658200  |
| H | 2.19438900  | 3.43562200  | 0.64635500  |
| C | 4.40806600  | 2.78053300  | -0.82131000 |
| H | 4.43057400  | 3.72521400  | -0.26919000 |
| H | 5.39527000  | 2.31120800  | -0.74918400 |
| H | 4.24072200  | 3.01982100  | -1.88019700 |
| S | -0.00628800 | -0.91241700 | 1.19948000  |
| O | -0.60878900 | -0.27845200 | 2.38790100  |
| O | 0.52897800  | -2.28413200 | 1.32394400  |

#### TS4

|                                              |                             |
|----------------------------------------------|-----------------------------|
| Zero-point correction=                       | 0.255386 (Hartree/Particle) |
| Thermal correction to Energy=                | 0.273926                    |
| Thermal correction to Enthalpy=              | 0.274870                    |
| Thermal correction to Gibbs Free Energy=     | 0.205130                    |
| Sum of electronic and zero-point Energies=   | -1291.923079                |
| Sum of electronic and thermal Energies=      | -1291.904539                |
| Sum of electronic and thermal Enthalpies=    | -1291.903595                |
| Sum of electronic and thermal Free Energies= | -1291.973335                |

|   |            |            |             |
|---|------------|------------|-------------|
| C | 1.27419500 | 2.94392500 | -0.97910900 |
| C | 1.12150500 | 1.55898100 | -1.03641700 |
| C | 1.32197600 | 0.77535600 | 0.11284600  |
| C | 1.67071300 | 1.40271600 | 1.32006600  |
| C | 1.82174600 | 2.78900500 | 1.37079900  |
| C | 1.62388600 | 3.56198000 | 0.22423300  |
| H | 1.11594000 | 3.53952400 | -1.87401800 |
| H | 0.84321800 | 1.07893300 | -1.96998400 |



|   |             |             |             |
|---|-------------|-------------|-------------|
| H | 1.82668800  | 0.80488900  | 2.21138100  |
| H | 2.09743300  | 3.26431100  | 2.30824600  |
| H | 1.74200800  | 4.64132700  | 0.26791700  |
| C | 1.16376000  | -0.69655400 | 0.02477500  |
| C | 1.88297700  | -1.53401600 | -0.73302900 |
| H | 1.65772000  | -2.59539800 | -0.78711000 |
| N | 5.17566800  | -0.87213800 | -0.90949600 |
| N | 4.07380400  | -1.00043100 | -1.16912600 |
| N | 2.92255300  | -1.08854200 | -1.60276400 |
| C | -4.02211900 | 0.35702700  | -0.65069000 |
| C | -3.40823900 | 0.88788000  | 0.49201600  |
| C | -2.23197000 | 0.33811900  | 1.00202700  |
| C | -1.66562700 | -0.76273000 | 0.35777300  |
| C | -2.25498000 | -1.31482600 | -0.78507300 |
| C | -3.42688200 | -0.75080000 | -1.27874300 |
| H | -3.85576200 | 1.74242400  | 0.99241500  |
| H | -1.76915700 | 0.75275000  | 1.89096700  |
| H | -1.80969400 | -2.17478700 | -1.27489600 |
| H | -3.89101900 | -1.17816400 | -2.16404200 |
| C | -5.29805700 | 0.94703900  | -1.19489400 |
| H | -5.57825700 | 1.85878900  | -0.65892600 |
| H | -5.19795600 | 1.19012900  | -2.25956700 |
| H | -6.12747200 | 0.23357500  | -1.10655600 |
| S | -0.15517400 | -1.48014000 | 0.99871100  |
| O | -0.15709900 | -2.92478900 | 0.69054400  |
| O | 0.00554900  | -1.04607300 | 2.40133300  |

#### 4a

Zero-point correction= 0.255911 (Hartree/Particle)  
Thermal correction to Energy= 0.275139

|                                              |              |
|----------------------------------------------|--------------|
| Thermal correction to Enthalpy=              | 0.276084     |
| Thermal correction to Gibbs Free Energy=     | 0.204451     |
| Sum of electronic and zero-point Energies=   | -1291.934206 |
| Sum of electronic and thermal Energies=      | -1291.914978 |
| Sum of electronic and thermal Enthalpies=    | -1291.914034 |
| Sum of electronic and thermal Free Energies= | -1291.985667 |

|   |             |             |             |
|---|-------------|-------------|-------------|
| C | 2.14332200  | -1.23121700 | -0.11729300 |
| C | 1.25337400  | -0.35277400 | 0.38526700  |
| C | -1.56188600 | -0.74688800 | 0.49805800  |
| C | -1.95905900 | -1.62082700 | -0.52000300 |
| C | -3.13176600 | -1.35488300 | -1.21946300 |
| C | -3.91724600 | -0.22796300 | -0.92133300 |
| C | -3.49459800 | 0.62900000  | 0.10385200  |
| C | -2.32111000 | 0.37987900  | 0.81649000  |
| C | -5.18837000 | 0.03893200  | -1.68658500 |
| C | 1.23996900  | 1.10978000  | 0.14447100  |
| C | 1.32050400  | 2.03095400  | 1.20299000  |
| C | 1.31707600  | 3.40199500  | 0.94434700  |
| C | 1.23322200  | 3.87214000  | -0.36851800 |
| C | 1.15115800  | 2.96347800  | -1.42657700 |
| C | 1.15102100  | 1.59205700  | -1.17359600 |
| N | 4.00517400  | -1.65918200 | -1.31190100 |
| N | 3.22794400  | -0.79020900 | -0.88042600 |
| N | 4.79724200  | -2.32970200 | -1.77525300 |
| O | -0.10685000 | -0.34332900 | 2.67777600  |
| O | 0.15737900  | -2.54456400 | 1.42783900  |
| S | -0.04803700 | -1.08074200 | 1.39831600  |
| H | 2.05050600  | -2.29684200 | 0.07066500  |
| H | 1.38995500  | 1.67022700  | 2.22324200  |
| H | 1.38503000  | 4.10353100  | 1.77150600  |

|   |             |             |             |
|---|-------------|-------------|-------------|
| H | 1.23136500  | 4.94073600  | -0.56614800 |
| H | 1.08170300  | 3.32117400  | -2.45033100 |
| H | 1.07644100  | 0.88758000  | -1.99668700 |
| H | -2.00802500 | 1.04608800  | 1.61306400  |
| H | -1.36562100 | -2.49854900 | -0.75488800 |
| H | -3.44645600 | -2.03329900 | -2.00855800 |
| H | -4.09085400 | 1.50333800  | 0.35116100  |
| H | -5.92586500 | -0.75464200 | -1.51071200 |
| H | -5.63967200 | 0.99137000  | -1.39310900 |
| H | -5.00031600 | 0.06596000  | -2.76676100 |
